# Supplementary material
Source: publisher site journal article supplement (http://oneecosystem.pensoft.net/article/download/suppl/3503023/)
Supplement: Supplementary file 1

TY  - JOUR
TI  - Soil management in relation to sustainable agriculture and ecosystem services
AU  - Powlson, D. S.
AU  - Gregory, P. J.
AU  - Whalley, W. R.
AU  - Quinton, J. N.
AU  - Hopkins, D. W.
AU  - Whitmore, A. P.
AU  - Hirsch, P. R.
AU  - Goulding, K. W. T.
T2  - Food Policy
T3  - The challenge of global food sustainability
AB  - Requirements for research, practices and policies affecting soil management in relation to global food security are reviewed. Managing soil organic carbon (C) is central because soil organic matter influences numerous soil properties relevant to ecosystem functioning and crop growth. Even small changes in total C content can have disproportionately large impacts on key soil physical properties. Practices to encourage maintenance of soil C are important for ensuring sustainability of all soil functions. Soil is a major store of C within the biosphere – increases or decreases in this large stock can either mitigate or worsen climate change. Deforestation, conversion of grasslands to arable cropping and drainage of wetlands all cause emission of C; policies and international action to minimise these changes are urgently required. Sequestration of C in soil can contribute to climate change mitigation but the real impact of different options is often misunderstood. Some changes in management that are beneficial for soil C, increase emissions of nitrous oxide (a powerful greenhouse gas) thus cancelling the benefit. Research on soil physical processes and their interactions with roots can lead to improved and novel practices to improve crop access to water and nutrients. Increased understanding of root function has implications for selection and breeding of crops to maximise capture of water and nutrients. Roots are also a means of delivering natural plant-produced chemicals into soil with potentially beneficial impacts. These include biocontrol of soil-borne pests and diseases and inhibition of the nitrification process in soil (conversion of ammonium to nitrate) with possible benefits for improved nitrogen use efficiency and decreased nitrous oxide emission. The application of molecular methods to studies of soil organisms, and their interactions with roots, is providing new understanding of soil ecology and the basis for novel practical applications. Policy makers and those concerned with development of management approaches need to keep a watching brief on emerging possibilities from this fast-moving area of science. Nutrient management is a key challenge for global food production: there is an urgent need to increase nutrient availability to crops grown by smallholder farmers in developing countries. Many changes in practices including inter-cropping, inclusion of nitrogen-fixing crops, agroforestry and improved recycling have been clearly demonstrated to be beneficial: facilitating policies and practical strategies are needed to make these widely available, taking account of local economic and social conditions. In the longer term fertilizers will be essential for food security: policies and actions are needed to make these available and affordable to small farmers. In developed regions, and those developing rapidly such as China, strategies and policies to manage more precisely the necessarily large flows of nutrients in ways that minimise environmental damage are essential. A specific issue is to minimise emissions of nitrous oxide whilst ensuring sufficient nitrogen is available for adequate food production. Application of known strategies (through either regulation or education), technological developments, and continued research to improve understanding of basic processes will all play a part. Decreasing soil erosion is essential, both to maintain the soil resource and to minimise downstream damage such as sedimentation of rivers with adverse impacts on fisheries. Practical strategies are well known but often have financial implications for farmers. Examples of systems for paying one group of land users for ecosystem services affecting others exist in several parts of the world and serve as a model.
DA  - 2011/01//
PY  - 2011
DO  - 10.1016/j.foodpol.2010.11.025
DP  - ScienceDirect
VL  - 36, Supplement 1
SP  - S72
EP  - S87
J2  - Food Policy
SN  - 0306-9192
UR  - http://www.sciencedirect.com/science/article/pii/S0306919210001399
Y2  - 2015/11/03/12:39:02
L1  - http://www.sciencedirect.com/science/article/pii/S0306919210001399/pdfft?md5=bb9f61b0955f1718f5ebf62f64875c3b&pid=1-s2.0-S0306919210001399-main.pdf
L2  - http://www.sciencedirect.com/science/article/pii/S0306919210001399
N1  - <p>Cited By :90</p>
N1  - <p>Cited By :90</p>
N1  - <p>Cited By :90</p>
N1  - <p>Cited By :91</p>
N1  - <p>Cited By :95</p>
N1  - <p>Cited By :95</p>
N1  - <p>Export Date: 2 December 2015</p>
N1  - <p>Export Date: 2 December 2015</p>
N1  - <p>Export Date: 3 December 2015</p>
N1  - <p>Export Date: 9 December 2015</p>
N1  - <p>Export Date: 21 December 2015</p>
N1  - <p>Export Date: 21 December 2015</p>
KW  - :Soil
KW  - aggregate
KW  - Aggregates
KW  - Aggregates
KW  - Agroforestry
KW  - alternative agriculture
KW  - Biochar
KW  - Biochar
KW  - Biodiversity
KW  - biodiversity
KW  - carbon
KW  - carbon
KW  - carbon sequestration
KW  - Climate change
KW  - Deforestation
KW  - ecosystem function
KW  - Ecosystem service
KW  - emission control
KW  - Erosion
KW  - Erosion
KW  - food production
KW  - food security
KW  - Intercropping
KW  - Minimum tillage
KW  - Minimum tillage
KW  - nitrification
KW  - Nitrogen
KW  - nitrogen
KW  - Nitrous oxide
KW  - Nitrous oxide
KW  - nutrient enrichment
KW  - Nutrients
KW  - Nutrients
KW  - organic carbon
KW  - Organic matter
KW  - Organic matter
KW  - Phosphorous
KW  - Phosphorous
KW  - phosphorus
KW  - recycling
KW  - Rhizosphere
KW  - Rhizosphere
KW  - root
KW  - roots
KW  - Roots
KW  - sedimentation
KW  - Sequestration
KW  - Sequestration
KW  - soil
KW  - Soil erosion
KW  - soil management
KW  - soil organic matter
KW  - Soil organisms
KW  - Soil organisms
KW  - soil property
KW  - soil structure
KW  - Soil structure
KW  - Sustainability
KW  - Tillage
ER  - 

TY  - JOUR
TI  - Valuing Supporting Soil Ecosystem Services in Agriculture: A Natural Capital Approach
AU  - Brady, Mark V.
AU  - Hedlund, Katarina
AU  - Cong, Rong-Gang
AU  - Hemerik, Lia
AU  - Hotes, Stefan
AU  - Machado, Stephen
AU  - Mattsson, Lennart
AU  - Schulz, Elke
AU  - Thomsen, Ingrid K.
T2  - Agronomy Journal
DA  - 2015///
PY  - 2015
DO  - 10.2134/agronj14.0597
DP  - CrossRef
VL  - 107
IS  - 5
SP  - 1809
LA  - en
SN  - 0002-1962
ST  - Valuing Supporting Soil Ecosystem Services in Agriculture
UR  - https://dl.sciencesocieties.org/publications/aj/abstracts/107/5/1809
Y2  - 2015/11/10/12:10:30
N1  - <p>Export Date: 2 December 2015</p>
N1  - <p>Export Date: 2 December 2015</p>
N1  - <p>Export Date: 2 December 2015</p>
N1  - <p>Export Date: 2 December 2015</p>
N1  - <p>Export Date: 3 December 2015</p>
N1  - <p>Export Date: 21 December 2015</p>
N1  - <p>Export Date: 21 December 2015</p>
ER  - 

TY  - JOUR
TI  - Indicators and trade-offs of ecosystem services in agricultural soils along a landscape heterogeneity gradient
AU  - Williams, Alwyn
AU  - Hedlund, Katarina
T2  - Applied Soil Ecology
AB  - Soil functions can be classified as supporting (nutrient cycling) and provisioning (crop production) ecosystem services (ES). These services consist of multiple and dynamic functions and are typically assessed using indicators, e.g. microbial biomass as an indicator of supporting services. Agricultural intensification negatively affects indicators of soil functions and is therefore considered to deplete soil ES. It has been suggested that incorporating leys into crop rotations can enhance soil ES. We examined this by comparing indicators of supporting soil services – organic carbon, nitrogen, water holding capacity and available phosphorous (carbon storage and nutrient retention); net nitrogen mineralisation rate and microbial biomass (nutrient cycling and retention) – in barley fields, leys and permanent pastures along a landscape heterogeneity gradient (100, 500 and 1000 m radii). In addition, barley yields (provisioning service) were analysed against these indicators to identify trade-offs among soil services. Levels of most indicators did not differ between barley and ley fields and were consistently lower than in permanent pastures. Leys supported greater microbial biomass than barley fields. Landscape heterogeneity had no effect on the indicators or microbial community composition. However, landscape heterogeneity correlated negatively with yield and soil pH, suggesting that soils in heterogeneous landscapes are less fertile and therefore have lower yields. No trade-offs were found between increasing barley yield and the soil indicators. The results suggest that soil ES are determined at the field level, with little influence from the surrounding landscape, and that greater crop yields do not necessarily come at the expense of supporting soil services.
DA  - 2014/05//
PY  - 2014
DO  - 10.1016/j.apsoil.2014.01.001
DP  - ScienceDirect
VL  - 77
SP  - 1
EP  - 8
J2  - Applied Soil Ecology
SN  - 0929-1393
UR  - http://www.sciencedirect.com/science/article/pii/S0929139314000183
Y2  - 2015/11/10/12:11:16
L1  - http://www.sciencedirect.com/science/article/pii/S0929139314000183/pdfft?md5=c59a2853b2ab05e549e0e5cb7755ff81&pid=1-s2.0-S0929139314000183-main.pdf
L2  - http://www.sciencedirect.com/science/article/pii/S0929139314000183
N1  - <p>Cited By :4</p>
N1  - <p>Cited By :4</p>
N1  - <p>Cited By :4</p>
N1  - <p>Cited By :4</p>
N1  - <p>Cited By :4</p>
N1  - <p>Cited By :4</p>
N1  - <p>Cited By :4</p>
N1  - <p>Export Date: 2 December 2015</p>
N1  - <p>Export Date: 2 December 2015</p>
N1  - <p>Export Date: 2 December 2015</p>
N1  - <p>Export Date: 2 December 2015</p>
N1  - <p>Export Date: 3 December 2015</p>
N1  - <p>Export Date: 21 December 2015</p>
N1  - <p>Export Date: 21 December 2015</p>
KW  - Ecosystem services
KW  - Ecosystem services
KW  - Landscape complexity
KW  - Landscape complexity
KW  - Microbial community
KW  - Microbial community
KW  - Mycorrhiza
KW  - Mycorrhiza
KW  - Soil carbon
KW  - Soil carbon
KW  - Trade-offs
KW  - Trade-offs
ER  - 

TY  - JOUR
TI  - A soil change-based methodology for the quantification and valuation of ecosystem services from agro-ecosystems: A case study of pastoral agriculture in New Zealand
AU  - Dominati, E.
AU  - Mackay, A.
AU  - Green, S.
AU  - Patterson, M.
T2  - Ecological Economics
AB  - This paper tests the steps required to transform a theoretical natural capital/ecosystem service framework for soils into an operational model. Each of the services provided by a volcanic soil under a pastoral dairy use are quantified and valued. The six guiding principles underpinning the method developed include differentiating soil services from supporting processes; identifying key soil properties and processes behind each service; distinguishing natural capital from added/built capital; identifying how external drivers affect natural capital stocks; analysing the impact of degradation processes on soil properties and basing the economic valuation on measured proxies. Proxies to quantify ecosystem services focus on the part played by soil in generating each service. This new approach highlights the importance of soil change in quantifying services, and goes beyond simply determining the status of soil natural capital. The total value of the ecosystem services provided by a volcanic soil under dairy in the Waikato region in New Zealand was estimated at $16,390/ha/year on average over 35 consecutive years. The services with the highest value were the filtering of nutrients and contaminants (58–63% of total value), followed by the provision of food and then flood mitigation. Regulating services had an economic value 2.5 times more important than provisioning services.
DA  - 2014/04//
PY  - 2014
DO  - 10.1016/j.ecolecon.2014.02.008
DP  - ScienceDirect
VL  - 100
SP  - 119
EP  - 129
J2  - Ecological Economics
SN  - 0921-8009
ST  - A soil change-based methodology for the quantification and valuation of ecosystem services from agro-ecosystems
UR  - http://www.sciencedirect.com/science/article/pii/S0921800914000445
Y2  - 2015/11/10/12:11:47
L1  - http://www.sciencedirect.com/science/article/pii/S0921800914000445/pdfft?md5=36e4326d7f5dbe23af188f17cb770b07&pid=1-s2.0-S0921800914000445-main.pdf
L2  - http://www.sciencedirect.com/science/article/pii/S0921800914000445
N1  - <p>Cited By :10</p>
N1  - <p>Cited By :10</p>
N1  - <p>Cited By :10</p>
N1  - <p>Cited By :10</p>
N1  - <p>Cited By :10</p>
N1  - <p>Cited By :12</p>
N1  - <p>Cited By :12</p>
N1  - <p>Export Date: 2 December 2015</p>
N1  - <p>Export Date: 2 December 2015</p>
N1  - <p>Export Date: 2 December 2015</p>
N1  - <p>Export Date: 2 December 2015</p>
N1  - <p>Export Date: 3 December 2015</p>
N1  - <p>Export Date: 21 December 2015</p>
N1  - <p>Export Date: 21 December 2015</p>
KW  - Agro-ecosystem
KW  - Agro-ecosystem
KW  - Economic valuation
KW  - Economic valuation
KW  - Ecosystem services
KW  - Ecosystem services
KW  - Natural capital
KW  - Natural capital
KW  - Quantification
KW  - Quantification
KW  - Soil change
KW  - Soil change
ER  - 

TY  - JOUR
TI  - Functional land management: A framework for managing soil-based ecosystem services for the sustainable intensification of agriculture
AU  - Schulte, Rogier P. O.
AU  - Creamer, Rachel E.
AU  - Donnellan, Trevor
AU  - Farrelly, Niall
AU  - Fealy, Reamonn
AU  - O’Donoghue, Cathal
AU  - O’hUallachain, Daire
T2  - Environmental Science & Policy
AB  - Sustainable food production has re-emerged at the top of the global policy agenda, driven by two challenges: (1) the challenge to produce enough food to feed a growing world population and (2) the challenge to make more efficient and prudent use of the world's natural resources. These challenges have led to a societal expectation that the agricultural sector increase productivity, and at the same time provide environmental ‘ecosystem services’ such as the provision of clean water, air, habitats for biodiversity, recycling of nutrients and mitigation against climate change. Whilst the degree to which agriculture can provide individual ecosystem services has been well researched, it is unclear how and to what extent agriculture can meet all expectations relating to environmental sustainability simultaneously, whilst increasing the quantity of food outputs. In this paper, we present a conceptual framework for the quantification of the ‘supply of’ and ‘demand for’ agricultural, soil-based ecosystem services or ‘soil functions’. We use Irish agriculture as a case-study for this framework, using proxy-indicators to determine the demand for individual soil functions, as set by agri-environmental policies, as well as the supply of soil functions, as defined by land use and soil type. We subsequently discuss how this functionality of soils can be managed or incentivised through policy measures, with a view to minimising the divergence between agronomic policies designed to promote increased agricultural production and environmental policy objectives. Finally, we discuss the applicability of this conceptual framework to agriculture and agri-environmental policies at EU level, and the implications for policy makers.
DA  - 2014/04//
PY  - 2014
DO  - 10.1016/j.envsci.2013.10.002
DP  - ScienceDirect
VL  - 38
SP  - 45
EP  - 58
J2  - Environmental Science & Policy
SN  - 1462-9011
ST  - Functional land management
UR  - http://www.sciencedirect.com/science/article/pii/S1462901113002104
Y2  - 2015/11/10/12:12:10
L1  - http://www.sciencedirect.com/science/article/pii/S1462901113002104/pdfft?md5=615cc018092ff31adbd156083a665672&pid=1-s2.0-S1462901113002104-main.pdf
L2  - http://www.sciencedirect.com/science/article/pii/S1462901113002104
N1  - <p>Cited By :11</p>
N1  - <p>Cited By :11</p>
N1  - <p>Cited By :11</p>
N1  - <p>Cited By :11</p>
N1  - <p>Cited By :11</p>
N1  - <p>Cited By :11</p>
N1  - <p>Cited By :11</p>
N1  - <p>Export Date: 2 December 2015</p>
N1  - <p>Export Date: 2 December 2015</p>
N1  - <p>Export Date: 2 December 2015</p>
N1  - <p>Export Date: 2 December 2015</p>
N1  - <p>Export Date: 3 December 2015</p>
N1  - <p>Export Date: 21 December 2015</p>
N1  - <p>Export Date: 21 December 2015</p>
KW  - Food security
KW  - food security
KW  - Soil framework directive
KW  - Soil framework directive
KW  - Soil functions
KW  - Soil functions
KW  - Soil quality
KW  - soil quality
KW  - Thematic strategy on soils
KW  - Thematic strategy on soils
ER  - 

TY  - JOUR
TI  - Urban and agricultural soils: conflicts and trade-offs in the optimization of ecosystem services
AU  - Setälä, H.
AU  - Bardgett, R. D.
AU  - Birkhofer, K.
AU  - Brady, M.
AU  - Byrne, L.
AU  - Ruiter, P. C. de
AU  - Vries, F. T. de
AU  - Gardi, C.
AU  - Hedlund, K.
AU  - Hemerik, L.
AU  - Hotes, S.
AU  - Liiri, M.
AU  - Mortimer, S. R.
AU  - Pavao-Zuckerman, M.
AU  - Pouyat, R.
AU  - Tsiafouli, M.
AU  - Putten, W. H. van der
T2  - Urban Ecosystems
AB  - On-going human population growth and changing patterns of resource consumption are increasing global demand for ecosystem services, many of which are provided by soils. Some of these ecosystem services are linearly related to the surface area of pervious soil, whereas others show non-linear relationships, making ecosystem service optimization a complex task. As limited land availability creates conflicting demands among various types of land use, a central challenge is how to weigh these conflicting interests and how to achieve the best solutions possible from a perspective of sustainable societal development. These conflicting interests become most apparent in soils that are the most heavily used by humans for specific purposes: urban soils used for green spaces, housing, and other infrastructure and agricultural soils for producing food, fibres and biofuels. We argue that, despite their seemingly divergent uses of land, agricultural and urban soils share common features with regards to interactions between ecosystem services, and that the trade-offs associated with decision-making, while scale- and context-dependent, can be surprisingly similar between the two systems. We propose that the trade-offs within land use types and their soil-related ecosystems services are often disproportional, and quantifying these will enable ecologists and soil scientists to help policy makers optimizing management decisions when confronted with demands for multiple services under limited land availability.
DA  - 2013/04/26/
PY  - 2013
DO  - 10.1007/s11252-013-0311-6
DP  - link.springer.com
VL  - 17
IS  - 1
SP  - 239
EP  - 253
J2  - Urban Ecosyst
LA  - en
SN  - 1083-8155, 1573-1642
ST  - Urban and agricultural soils
UR  - http://link.springer.com/article/10.1007/s11252-013-0311-6
Y2  - 2015/11/10/12:12:33
L1  - http://link.springer.com/content/pdf/10.1007%2Fs11252-013-0311-6.pdf
L2  - http://link.springer.com/article/10.1007%2Fs11252-013-0311-6
N1  - <p>Cited By :2</p>
N1  - <p>Cited By :2</p>
N1  - <p>Cited By :2</p>
N1  - <p>Cited By :2</p>
N1  - <p>Cited By :2</p>
N1  - <p>Cited By :2</p>
N1  - <p>Cited By :2</p>
N1  - <p>Export Date: 2 December 2015</p>
N1  - <p>Export Date: 2 December 2015</p>
N1  - <p>Export Date: 2 December 2015</p>
N1  - <p>Export Date: 2 December 2015</p>
N1  - <p>Export Date: 3 December 2015</p>
N1  - <p>Export Date: 21 December 2015</p>
N1  - <p>Export Date: 21 December 2015</p>
KW  - Agriculture
KW  - Agriculture
KW  - Ecology
KW  - Ecosystem services
KW  - Ecosystem services
KW  - Environmental Management
KW  - Land use
KW  - land use
KW  - Management optimization
KW  - Management optimization
KW  - Nature Conservation
KW  - Soil
KW  - soil
KW  - Trade-off
KW  - trade-off
KW  - Urban
KW  - Urban
KW  - Urban Ecology
ER  - 

TY  - JOUR
TI  - How does agricultural management modify ecosystem services in the argentine Pampas? The effects on soil C dynamics
AU  - Caride, Constanza
AU  - Piñeiro, Gervasio
AU  - Paruelo, José María
T2  - Agriculture, Ecosystems & Environment
T3  - Ecosystem Services and Land-Use Policy
AB  - Crop management modifies the structure and functioning of the ecosystems. C dynamics has been identified as a key intermediate or support ecosystem service that is profoundly altered by agricultural practices. The temperate grasslands of Argentina, the Pampas, are one of the main crop production regions of the world. Crop sequence, tillage and fertilization change inputs and outputs and, consequently the whole C dynamics. Our objectives in this article were (i) to provide a spatially explicit characterization, based on remotely sensed data, of crop sequences and tillage systems in the Rolling Pampas, (ii) to evaluate changes in C gains by computing the absorbed photosynthetic active radiation (APAR) from NDVI data of different crop, (iii) to evaluate the soil organic carbon (SOC) balance of different management schemes (crop sequence, conventional tillage vs. no till and three levels of nitrogen fertilization) using the CENTURY model, and (iv) to estimate the changes in SOC at a regional level. The results showed that 54% of the area was under continuous agriculture, with only two crop rotations occupying 61% of the area, and the main tillage system was no-tillage (73% of the area analyzed). Annual APAR was lower in crops than in rangelands, except for wheat-soybean double crop. Based on CENTURY simulations the crop management which had a most negative SOC balance (SOC reference value (100%) = 79 t ha−1) was crop sequence “maize/soybean” under conventional tillage and with no fertilizer application (37% losses of SOC in 60 years). The management that presented the most positive SOC balance was “soybean/wheat-soybean double crop (6 years) pasture (4 years)” under no till and with high fertilization (10% increase of SOC in 60 years). A positive and linear relationship was found between APAR estimates derived from satellite data and simulated SOC providing basis for a quantitative hypothesis on the importance of C inputs on SOC's dynamics. At regional scale, if crop sequences proportions remain constant, the lost of SOC would average a 15% in 60 years.
DA  - 2012/07/01/
PY  - 2012
DO  - 10.1016/j.agee.2011.05.031
DP  - ScienceDirect
VL  - 154
SP  - 23
EP  - 33
J2  - Agriculture, Ecosystems & Environment
SN  - 0167-8809
ST  - How does agricultural management modify ecosystem services in the argentine Pampas?
UR  - http://www.sciencedirect.com/science/article/pii/S0167880911001903
Y2  - 2015/11/10/12:13:32
L1  - http://www.sciencedirect.com/science/article/pii/S0167880911001903/pdfft?md5=b1aa8274888a7c11ae61aa67b4254dbb&pid=1-s2.0-S0167880911001903-main.pdf
L2  - http://www.sciencedirect.com/science/article/pii/S0167880911001903
N1  - <p>Cited By :10</p>
N1  - <p>Cited By :10</p>
N1  - <p>Cited By :10</p>
N1  - <p>Cited By :10</p>
N1  - <p>Cited By :10</p>
N1  - <p>Export Date: 2 December 2015</p>
N1  - <p>Export Date: 2 December 2015</p>
N1  - <p>Export Date: 3 December 2015</p>
N1  - <p>Export Date: 21 December 2015</p>
N1  - <p>Export Date: 21 December 2015</p>
KW  - Agricultural management
KW  - agricultural practice
KW  - APAR
KW  - APAR
KW  - Argentina
KW  - carbon
KW  - carbon
KW  - carbon flux
KW  - Conservation tillage
KW  - crop production
KW  - ecosystem function
KW  - Ecosystem service
KW  - Glycine max
KW  - grassland
KW  - Grasslands
KW  - Grasslands
KW  - MODIS
KW  - MODIS
KW  - Monteith model
KW  - Monteith model
KW  - organic soil
KW  - Pampas
KW  - photosynthetically active radiation
KW  - rangeland
KW  - Remote sensing
KW  - satellite data
KW  - SOC
KW  - SOC
KW  - Soil carbon
KW  - Soybean
KW  - temperate environment
KW  - Triticum aestivum
KW  - wheat
KW  - zero tillage
ER  - 

TY  - JOUR
TI  - Provision of contrasting ecosystem services by soil communities from different agricultural fields
AU  - Verbruggen, Erik
AU  - Kiers, E. Toby
AU  - Bakelaar, Patrick N. C.
AU  - Röling, Wilfred F. M.
AU  - Heijden, Marcel G. A. van der
T2  - Plant and Soil
AB  - Several studies have shown that soil biotic communities from organically managed fields are more diverse and exhibit higher activity levels compared to conventionally managed fields. The impact of these different soil communities on plant productivity and the provision of soil ecosystem services are, however, still unclear. Here, we test the effects of soil inoculation from each of three organic and three conventional maize fields on maize productivity and nutrient loss during leaching events induced by simulated rain. In particular, we examine whether differences in productivity and nutrient loss are related to the abundance and species composition of arbuscular mycorrhizal (AM) fungi. We hypothesized that soil biota from organically managed fields would improve maize growth and reduce nutrient leaching significantly more than those from conventionally managed fields. In contrast to our hypothesis, we found that plant productivity was negatively affected by soil inoculation, and this effect was stronger with inoculum from organic fields. Plant productivity was inversely correlated with AMF abundance, suggesting that enhanced carbon allocation to AMF is at least in part responsible for plant growth reduction under our experimental conditions. However, soil inoculation did alter the ecological functioning of the system by reducing phosphorus leaching losses after simulated rain. Moreover, these leaching losses were lower with increased hyphal density and were related with abundance of particular AMF types, suggesting that abundance of AMF and their community composition may be useful indicators of phosphorus leaching losses. The results demonstrate that soil communities from different agricultural fields vary in their impact on plant productivity and nutrient leaching losses. The results further indicate that there is a potential tradeoff between positive effects of soil communities on sustainability and negative effects on crop productivity.
DA  - 2011/06/14/
PY  - 2011
DO  - 10.1007/s11104-011-0828-5
DP  - link.springer.com
VL  - 350
IS  - 1-2
SP  - 43
EP  - 55
J2  - Plant Soil
LA  - en
SN  - 0032-079X, 1573-5036
UR  - http://link.springer.com/article/10.1007/s11104-011-0828-5
Y2  - 2015/11/10/12:14:04
L1  - http://link.springer.com/content/pdf/10.1007%2Fs11104-011-0828-5.pdf
L2  - http://link.springer.com/article/10.1007%2Fs11104-011-0828-5
N1  - <p>Cited By :27</p>
N1  - <p>Cited By :27</p>
N1  - <p>Cited By :27</p>
N1  - <p>Cited By :27</p>
N1  - <p>Cited By :27</p>
N1  - <p>Export Date: 2 December 2015</p>
N1  - <p>Export Date: 2 December 2015</p>
N1  - <p>Export Date: 3 December 2015</p>
N1  - <p>Export Date: 21 December 2015</p>
N1  - <p>Export Date: 21 December 2015</p>
KW  - abundance
KW  - agricultural land
KW  - Arbuscular
KW  - Arbuscular mycorrhiza
KW  - Arbuscular mycorrhizal fungi
KW  - Arbuscular mycorrhizal fungi
KW  - biomass
KW  - Biomass production
KW  - Biomass production
KW  - community composition
KW  - crop production
KW  - Ecology
KW  - ecosystem function
KW  - Ecosystem service
KW  - Fungi
KW  - growth response
KW  - inoculation
KW  - leaching
KW  - maize
KW  - management practice
KW  - numerical model
KW  - nutrient cycling
KW  - phosphorus
KW  - Phosphorus leaching
KW  - Phosphorus leaching
KW  - Plant Physiology
KW  - Plant Sciences
KW  - Plant–soil feedback
KW  - Plant-soil feedback
KW  - resource allocation
KW  - soil biota
KW  - Soil functioning
KW  - Soil functioning
KW  - Soil Science & Conservation
KW  - Sustainability
KW  - Sustainability
KW  - trade-off
KW  - Zea mays
ER  - 

TY  - JOUR
TI  - Spatial patterns of agricultural expansion determine impacts on biodiversity and carbon storage
AU  - Chaplin-Kramer, Rebecca
AU  - Sharp, Richard P.
AU  - Mandle, Lisa
AU  - Sim, Sarah
AU  - Johnson, Justin
AU  - Butnar, Isabela
AU  - Canals, Llorenç Milà i
AU  - Eichelberger, Bradley A.
AU  - Ramler, Ivan
AU  - Mueller, Carina
AU  - McLachlan, Nikolaus
AU  - Yousefi, Anahita
AU  - King, Henry
AU  - Kareiva, Peter M.
T2  - Proceedings of the National Academy of Sciences
AB  - The agricultural expansion and intensification required to meet growing food and agri-based product demand present important challenges to future levels and management of biodiversity and ecosystem services. Influential actors such as corporations, governments, and multilateral organizations have made commitments to meeting future agricultural demand sustainably and preserving critical ecosystems. Current approaches to predicting the impacts of agricultural expansion involve calculation of total land conversion and assessment of the impacts on biodiversity or ecosystem services on a per-area basis, generally assuming a linear relationship between impact and land area. However, the impacts of continuing land development are often not linear and can vary considerably with spatial configuration. We demonstrate what could be gained by spatially explicit analysis of agricultural expansion at a large scale compared with the simple measure of total area converted, with a focus on the impacts on biodiversity and carbon storage. Using simple modeling approaches for two regions of Brazil, we find that for the same amount of land conversion, the declines in biodiversity and carbon storage can vary two- to fourfold depending on the spatial pattern of conversion. Impacts increase most rapidly in the earliest stages of agricultural expansion and are more pronounced in scenarios where conversion occurs in forest interiors compared with expansion into forests from their edges. This study reveals the importance of spatially explicit information in the assessment of land-use change impacts and for future land management and conservation.
DA  - 2015/06/16/
PY  - 2015
DO  - 10.1073/pnas.1406485112
DP  - www.pnas.org
VL  - 112
IS  - 24
SP  - 7402
EP  - 7407
J2  - PNAS
LA  - en
SN  - 0027-8424, 1091-6490
UR  - http://www.pnas.org/content/112/24/7402
Y2  - 2015/11/12/15:14:16
L1  - http://www.pnas.org/content/112/24/7402.full.pdf
L2  - http://www.ncbi.nlm.nih.gov/pubmed/26082547
L2  - http://www.pnas.org/content/112/24/7402
N1  - <p>Chemicals/CAS: carbon, 7440-44-0</p>
N1  - <p>Chemicals/CAS: carbon, 7440-44-0</p>
N1  - <p>Cited By :2</p>
N1  - <p>Cited By :2</p>
N1  - <p>Cited By :2</p>
N1  - <p>Cited By :2</p>
N1  - <p>Cited By :2</p>
N1  - <p>Cited By :2</p>
N1  - <p>Cited By :2</p>
N1  - <p>Cited By :2</p>
N1  - <p>CODEN: PNASA</p>
N1  - <p>CODEN: PNASA</p>
N1  - <p>Correspondence Address: Chaplin-Kramer, R.; Natural Capital Project, Woods Institute for the Environment, Stanford UniversityUnited States</p>
N1  - <p>Correspondence Address: Chaplin-Kramer, R.; Natural Capital Project, Woods Institute for the Environment, Stanford UniversityUnited States</p>
N1  - <p>Export Date: 2 December 2015</p>
N1  - <p>Export Date: 2 December 2015</p>
N1  - <p>Export Date: 2 December 2015</p>
N1  - <p>Export Date: 2 December 2015</p>
N1  - <p>Export Date: 2 December 2015</p>
N1  - <p>Export Date: 3 December 2015</p>
N1  - <p>Export Date: 21 December 2015</p>
N1  - <p>Export Date: 21 December 2015</p>
N1  - <p>References: Schmitz, C., Land-use change trajectories up to 2050: Insights from a global agro-economic model comparison (2014) Agric Econ, 45 (1), pp. 69-84; <br/>(2002) FSC Principles and Criteria for Forest Stewardship, , (Forest Stewardship Council, Bonn), Version 4;<br/>(2012) Performance Standards, , www.ifc.org/wps/wcm/connect/c8f524004a73daeca09afdf998895a12/IFC_Performance_Standards.pdf?MOD=AJPERES, World Bank Group. Available at Accessed April 3, 2015;<br/>(2013) Adoption of Principles and Criteria for the Production of Sustainable Palm Oil, , www.rspo.org/file/revisedPandC2013.pdf, Available at Accessed April 3, 2015;<br/>Ray, D.K., Mueller, N.D., West, P.C., Foley, J.A., Yield trends are insufficient to double global crop production by 2050 (2013) PLoS One, 8. , Available at journals.plos.org/plosone/article?id=10.1371/journal.pone.0066428. Accessed July 18, 2014;<br/>Green, R.E., Cornell, S.J., Scharlemann, J.P.W., Balmford, A., Farming and the fate of wild nature (2005) Science, 307 (5709), pp. 550-555;<br/>Phalan, B., Onial, M., Balmford, A., Green, R.E., Reconciling food production and biodiversity conservation: Land sharing and land sparing compared (2011) Science, 333 (6047), pp. 1289-1291;<br/>Fischer, J., Should agricultural policies encourage land-sparing or wildlife-friendly farming? (2008) Front Ecol Environ, 6, pp. 380-385;<br/>Tscharntke, T., Global food security, biodiversity conservation and the future of agricultural intensification (2012) Biol Conserv, 151, pp. 53-59;<br/>Kremen, C., Managing ecosystem services: What do we need to know about their ecology? (2005) Ecol Lett, 8 (5), pp. 468-479;<br/>Ricketts, T.H., Lonsdorf, E., Mapping the margin: Comparing marginal values of tropical forest remnants for pollination services (2013) Ecol Appl, 23 (5), pp. 1113-1123;<br/>Polasky, S., Where to put things? Spatial land management to sustain biodiversity and economic returns (2008) Biol Conserv, 141, pp. 1505-1524;<br/>De Groot, R.S., Alkemade, R., Braat, L., Hein, L., Willemen, L., Challenges in integrating the concept of ecosystem services and values in landscape planning, management and decision making (2010) Ecol Complex, 7 (3), pp. 260-272;<br/>Kareiva, P., Tallis, H., Ricketts, T.H., Daily, G.C., (2011) Natural Capital: Theory and Practice of Mapping Ecosystem Services, , ed Polasky S (Oxford University Press, Oxford);<br/>Sharp, R., (2014) InVEST 3.0 User's Guide, , The Natural Capital Project, Stanford, CA;<br/>Alkemade, R., GLOBIO3: A framework to investigate options for reducing global terrestrial biodiversity loss (2009) Ecosystems, 12 (3), pp. 374-390;<br/>Villa, F., A methodology for adaptable and robust ecosystem services assessment (2014) PLoS ONE, 9 (3);<br/>Ruckelshaus, M., Notes from the field: Lessons learned from using ecosystem service approaches to inform real-world decisions (2013) Ecol Econ;<br/>Reyers, B., Ecosystem services, land-cover change, and stakeholders: Finding a sustainable foothold for a semiarid biodiversity hotspot (2009) Ecol Soc, 14 (1), p. 38;<br/>Zheng, H., Benefits, costs, and livelihood implications of a regional payment for ecosystem service program (2013) Proc Natl Acad Sci USA, 110 (41), pp. 16681-16686;<br/>Bateman, I.J., Bringing ecosystem services into economic decision-making: Land use in the United Kingdom (2013) Science, 341 (6141), pp. 45-50;<br/>Blomqvist, L., Does the shoe fit? Real versus imagined ecological footprints (2013) PLoS Biol, 11 (11). , Available at journals.plos.org/plosbiology/article?id=10.1371/journal.pbio.1001700. Accessed April 3, 2015;<br/>FAOSTAT, (2013) FAO Statistical Database, , Available at faostat3.fao.org/home/E. Accessed April 4, 2015;<br/>(2010) ISU World Agricultural Outlook 2010-2025, , www.fapri.iastate.edu/outlook/2012/, Available at Accessed April 4, 2015;<br/>Leopold, A., (2010) TEEBcase: Agroecological Zoning, Brazil, , www.eea.europa.eu/atlas/teeb/agroecological-zoning-brazil, Available at Accessed April 4, 2015;<br/>Bailes, R., (2014) Brazilian Soy Moratorium: So Far, Soy Good?, , www.ethicalcorp.com/supply-chains/brazilian-soy-moratorium-%E2%80%93-so-far-soygood, Available at March 8, 2014;<br/>(2013) IBGD Data Recovery System, , www.sidra.ibge.gov.br/bda/acervo/acervo2.asp?e=v&p=PA&z=t&o=11, Available at Accessed October 2013;<br/>Phalan, B., Balmford, A., Green, R.E., Scharlemann, J.P.W., Minimising the harm to biodiversity of producing more food globally (2011) Food Policy, 36, pp. S62-S71;<br/>Fischer, J., Bawa, K., Brussaard, L., Conservation: Limits of land sparing (2011) Science, 334 (6056), p. 593;<br/>Balmford, A., Green, R., Phalan, B., What conservationists need to know about farming (2012) Proc Biol Sci, 279 (1739), pp. 2714-2724;<br/>Strassburg, B.B.N., Global congruence of carbon storage and biodiversity in terrestrial ecosystems (2010) Conserv Lett, 3 (2), pp. 98-105;<br/>Naidoo, R., Global mapping of ecosystem services and conservation priorities (2008) Proc Natl Acad Sci USA, 105 (28), pp. 9495-9500;<br/>Nelson, E., Modeling multiple ecosystem services, biodiversity conservation, commodity production, and tradeoffs at landscape scales (2009) Front Ecol, 7 (1), pp. 4-11;<br/>Milà I Canals, L., Rigarlsford, G., Sim, S., Land use impact assessment of margarine (2012) Int J Life Cycle Assess, 18 (6), pp. 1265-1277;<br/>Hellweg, S., Milà I Canals, L., Emerging approaches, challenges and opportunities in life cycle assessment (2014) Science, 344 (6188), pp. 1109-1113;<br/>Costanza, R., The dynamics of the ecological footprint concept (2000) Ecol Econ, 32, pp. 341-345;<br/>Herold, M., Options for monitoring and estimating historical carbon emissions from forest degradation in the context of REDD+ (2011) Carbon Balance Manag, 6 (1), p. 13;<br/>Fahrig, L., Effects of habitat fragmentation on biodiversity (2003) Annu Rev Ecol Evol Syst, 34, pp. 487-515;<br/>Fahrig, L., Effect of habitat fragmentation on the extinction threshold: A synthesis (2002) Ecol Appl, 12 (2), pp. 346-353;<br/>Carpenter, S.R., Science for managing ecosystem services: Beyond the Millennium Ecosystem Assessment (2009) Proc Natl Acad Sci USA, 106 (5), pp. 1305-1312;<br/>Ramankutty, N., Foley, J.A., Estimating historical changes in global land cover: Croplands from 1700 to 1992 (1999) Global Biogeochem Cycles, 13 (4), pp. 997-1027;<br/>Monfreda, C., Ramankutty, N., Foley, J.A., Farming the planet: 2. Geographic distribution of crop areas, yields, physiological types, and net primary production in the year 2000 (2008) Global Biogeochem Cycles, 22 (1);<br/>Gaston, K.J., Blackburn, T.M., Klein Goldewijk, K., Habitat conversion and global avian biodiversity loss (2003) Proc Biol Sci, 270 (1521), pp. 1293-1300;<br/>Pereira, H.M., Scenarios for global biodiversity in the 21st century (2010) Science, 330 (6010), pp. 1496-1501;<br/>Ruesch, A., Gibbs, H., (2008) New IPCC Tier-1 Global Biomass Carbon Map for the Year 2000, , (Carbon Dioxide Information Analysis Center, Oak Ridge National Laboratory, Oak Ridge, TN). Available at cdiac.ornl.gov;<br/>Intergovernmental Panel on Climate Change (IPCC), (2006) IPCC Guidelines for National Greenhouse Gas Inventories: Agriculture, Forestry and Other Land Use, 4. , Institute for Global Environmental Strategies, Hayama, Japan;<br/>Penman, J., (2003) Good Practice Guidance for Land Use, Land-Use Change and Forestry, , IPCC National Greenhouse Gas Inventories Programme and Institute for Global Environmental Strategies, Kanagawa, Japan;<br/>Broadbent, E., Forest fragmentation and edge effects from deforestation and selective logging in the Brazilian Amazon (2008) Biol Conserv, 141, pp. 1745-1757;<br/>De Paula, M.D., Alves-Costa, C., Tabarelli, M., Carbon storage in a fragmented landscape of Atlantic forest: The role played by edge-affected habitats and emergent trees (2011) Trop Conserv Sci, 4 (3), pp. 349-358;<br/>Baccini, A., Estimated carbon dioxide emissions from tropical deforestation improved by carbon-density maps (2012) Nat Clim Chang, 2, pp. 182-185</p>
N1  - <p>References: Schmitz, C., Land-use change trajectories up to 2050: Insights from a global agro-economic model comparison (2014) Agric Econ, 45 (1), pp. 69-84; <br/>(2002) FSC Principles and Criteria for Forest Stewardship, , (Forest Stewardship Council, Bonn), Version 4;<br/>(2012) Performance Standards, , www.ifc.org/wps/wcm/connect/c8f524004a73daeca09afdf998895a12/IFC_Performance_Standards.pdf?MOD=AJPERES, World Bank Group. Available at Accessed April 3, 2015;<br/>(2013) Adoption of Principles and Criteria for the Production of Sustainable Palm Oil, , www.rspo.org/file/revisedPandC2013.pdf, Available at Accessed April 3, 2015;<br/>Ray, D.K., Mueller, N.D., West, P.C., Foley, J.A., Yield trends are insufficient to double global crop production by 2050 (2013) PLoS One, 8. , Available at journals.plos.org/plosone/article?id=10.1371/journal.pone.0066428. Accessed July 18, 2014;<br/>Green, R.E., Cornell, S.J., Scharlemann, J.P.W., Balmford, A., Farming and the fate of wild nature (2005) Science, 307 (5709), pp. 550-555;<br/>Phalan, B., Onial, M., Balmford, A., Green, R.E., Reconciling food production and biodiversity conservation: Land sharing and land sparing compared (2011) Science, 333 (6047), pp. 1289-1291;<br/>Fischer, J., Should agricultural policies encourage land-sparing or wildlife-friendly farming? (2008) Front Ecol Environ, 6, pp. 380-385;<br/>Tscharntke, T., Global food security, biodiversity conservation and the future of agricultural intensification (2012) Biol Conserv, 151, pp. 53-59;<br/>Kremen, C., Managing ecosystem services: What do we need to know about their ecology? (2005) Ecol Lett, 8 (5), pp. 468-479;<br/>Ricketts, T.H., Lonsdorf, E., Mapping the margin: Comparing marginal values of tropical forest remnants for pollination services (2013) Ecol Appl, 23 (5), pp. 1113-1123;<br/>Polasky, S., Where to put things? Spatial land management to sustain biodiversity and economic returns (2008) Biol Conserv, 141, pp. 1505-1524;<br/>De Groot, R.S., Alkemade, R., Braat, L., Hein, L., Willemen, L., Challenges in integrating the concept of ecosystem services and values in landscape planning, management and decision making (2010) Ecol Complex, 7 (3), pp. 260-272;<br/>Kareiva, P., Tallis, H., Ricketts, T.H., Daily, G.C., (2011) Natural Capital: Theory and Practice of Mapping Ecosystem Services, , ed Polasky S (Oxford University Press, Oxford);<br/>Sharp, R., (2014) InVEST 3.0 User's Guide, , The Natural Capital Project, Stanford, CA;<br/>Alkemade, R., GLOBIO3: A framework to investigate options for reducing global terrestrial biodiversity loss (2009) Ecosystems, 12 (3), pp. 374-390;<br/>Villa, F., A methodology for adaptable and robust ecosystem services assessment (2014) PLoS ONE, 9 (3);<br/>Ruckelshaus, M., Notes from the field: Lessons learned from using ecosystem service approaches to inform real-world decisions (2013) Ecol Econ;<br/>Reyers, B., Ecosystem services, land-cover change, and stakeholders: Finding a sustainable foothold for a semiarid biodiversity hotspot (2009) Ecol Soc, 14 (1), p. 38;<br/>Zheng, H., Benefits, costs, and livelihood implications of a regional payment for ecosystem service program (2013) Proc Natl Acad Sci USA, 110 (41), pp. 16681-16686;<br/>Bateman, I.J., Bringing ecosystem services into economic decision-making: Land use in the United Kingdom (2013) Science, 341 (6141), pp. 45-50;<br/>Blomqvist, L., Does the shoe fit? Real versus imagined ecological footprints (2013) PLoS Biol, 11 (11). , Available at journals.plos.org/plosbiology/article?id=10.1371/journal.pbio.1001700. Accessed April 3, 2015;<br/>FAOSTAT, (2013) FAO Statistical Database, , Available at faostat3.fao.org/home/E. Accessed April 4, 2015;<br/>(2010) ISU World Agricultural Outlook 2010-2025, , www.fapri.iastate.edu/outlook/2012/, Available at Accessed April 4, 2015;<br/>Leopold, A., (2010) TEEBcase: Agroecological Zoning, Brazil, , www.eea.europa.eu/atlas/teeb/agroecological-zoning-brazil, Available at Accessed April 4, 2015;<br/>Bailes, R., (2014) Brazilian Soy Moratorium: So Far, Soy Good?, , www.ethicalcorp.com/supply-chains/brazilian-soy-moratorium-%E2%80%93-so-far-soygood, Available at March 8, 2014;<br/>(2013) IBGD Data Recovery System, , www.sidra.ibge.gov.br/bda/acervo/acervo2.asp?e=v&p=PA&z=t&o=11, Available at Accessed October 2013;<br/>Phalan, B., Balmford, A., Green, R.E., Scharlemann, J.P.W., Minimising the harm to biodiversity of producing more food globally (2011) Food Policy, 36, pp. S62-S71;<br/>Fischer, J., Bawa, K., Brussaard, L., Conservation: Limits of land sparing (2011) Science, 334 (6056), p. 593;<br/>Balmford, A., Green, R., Phalan, B., What conservationists need to know about farming (2012) Proc Biol Sci, 279 (1739), pp. 2714-2724;<br/>Strassburg, B.B.N., Global congruence of carbon storage and biodiversity in terrestrial ecosystems (2010) Conserv Lett, 3 (2), pp. 98-105;<br/>Naidoo, R., Global mapping of ecosystem services and conservation priorities (2008) Proc Natl Acad Sci USA, 105 (28), pp. 9495-9500;<br/>Nelson, E., Modeling multiple ecosystem services, biodiversity conservation, commodity production, and tradeoffs at landscape scales (2009) Front Ecol, 7 (1), pp. 4-11;<br/>Milà I Canals, L., Rigarlsford, G., Sim, S., Land use impact assessment of margarine (2012) Int J Life Cycle Assess, 18 (6), pp. 1265-1277;<br/>Hellweg, S., Milà I Canals, L., Emerging approaches, challenges and opportunities in life cycle assessment (2014) Science, 344 (6188), pp. 1109-1113;<br/>Costanza, R., The dynamics of the ecological footprint concept (2000) Ecol Econ, 32, pp. 341-345;<br/>Herold, M., Options for monitoring and estimating historical carbon emissions from forest degradation in the context of REDD+ (2011) Carbon Balance Manag, 6 (1), p. 13;<br/>Fahrig, L., Effects of habitat fragmentation on biodiversity (2003) Annu Rev Ecol Evol Syst, 34, pp. 487-515;<br/>Fahrig, L., Effect of habitat fragmentation on the extinction threshold: A synthesis (2002) Ecol Appl, 12 (2), pp. 346-353;<br/>Carpenter, S.R., Science for managing ecosystem services: Beyond the Millennium Ecosystem Assessment (2009) Proc Natl Acad Sci USA, 106 (5), pp. 1305-1312;<br/>Ramankutty, N., Foley, J.A., Estimating historical changes in global land cover: Croplands from 1700 to 1992 (1999) Global Biogeochem Cycles, 13 (4), pp. 997-1027;<br/>Monfreda, C., Ramankutty, N., Foley, J.A., Farming the planet: 2. Geographic distribution of crop areas, yields, physiological types, and net primary production in the year 2000 (2008) Global Biogeochem Cycles, 22 (1);<br/>Gaston, K.J., Blackburn, T.M., Klein Goldewijk, K., Habitat conversion and global avian biodiversity loss (2003) Proc Biol Sci, 270 (1521), pp. 1293-1300;<br/>Pereira, H.M., Scenarios for global biodiversity in the 21st century (2010) Science, 330 (6010), pp. 1496-1501;<br/>Ruesch, A., Gibbs, H., (2008) New IPCC Tier-1 Global Biomass Carbon Map for the Year 2000, , (Carbon Dioxide Information Analysis Center, Oak Ridge National Laboratory, Oak Ridge, TN). Available at cdiac.ornl.gov;<br/>Intergovernmental Panel on Climate Change (IPCC), (2006) IPCC Guidelines for National Greenhouse Gas Inventories: Agriculture, Forestry and Other Land Use, 4. , Institute for Global Environmental Strategies, Hayama, Japan;<br/>Penman, J., (2003) Good Practice Guidance for Land Use, Land-Use Change and Forestry, , IPCC National Greenhouse Gas Inventories Programme and Institute for Global Environmental Strategies, Kanagawa, Japan;<br/>Broadbent, E., Forest fragmentation and edge effects from deforestation and selective logging in the Brazilian Amazon (2008) Biol Conserv, 141, pp. 1745-1757;<br/>De Paula, M.D., Alves-Costa, C., Tabarelli, M., Carbon storage in a fragmented landscape of Atlantic forest: The role played by edge-affected habitats and emergent trees (2011) Trop Conserv Sci, 4 (3), pp. 349-358;<br/>Baccini, A., Estimated carbon dioxide emissions from tropical deforestation improved by carbon-density maps (2012) Nat Clim Chang, 2, pp. 182-185</p>
KW  - agricultural expansion
KW  - Agricultural expansion
KW  - agricultural land
KW  - Agriculture
KW  - Article
KW  - biodiversity
KW  - Brazil
KW  - carbon
KW  - carbon storage
KW  - cropland
KW  - Deforestation
KW  - Deforestation
KW  - Ecosystem services
KW  - Ecosystem services
KW  - edge effects
KW  - Edge effects
KW  - forest
KW  - fragmentation
KW  - Fragmentation
KW  - habitat
KW  - human
KW  - landscape
KW  - land use
KW  - population abundance
KW  - priority journal
KW  - vegetation
ER  - 

TY  - JOUR
TI  - Cost of reactive nitrogen release from human activities to the environment in the United States
AU  - Sobota, D.J.
AU  - Compton, J.E.
AU  - McCrackin, M.L.
AU  - Singh, S.
T2  - Environmental Research Letters
DA  - 2015///
PY  - 2015
DO  - 10.1088/1748-9326/10/2/025006
VL  - 10
IS  - 2
UR  - http://www.scopus.com/inward/record.url?eid=2-s2.0-84923786173&partnerID=40&md5=5b641b85f8665fe3631f39ecd07d7f49
DB  - Scopus
N1  - <p>Cited By :3</p>
N1  - <p>Cited By :3</p>
N1  - <p>Cited By :3</p>
N1  - <p>Cited By :3</p>
N1  - <p>Cited By :3</p>
N1  - <p>Cited By :3</p>
N1  - <p>Cited By :3</p>
N1  - <p>Cited By :3</p>
N1  - <p>Cited By :4</p>
N1  - <p>Cited By :4</p>
N1  - <p>Cited By :4</p>
N1  - <p>Export Date: 2 December 2015</p>
N1  - <p>Export Date: 2 December 2015</p>
N1  - <p>Export Date: 2 December 2015</p>
N1  - <p>Export Date: 2 December 2015</p>
N1  - <p>Export Date: 2 December 2015</p>
N1  - <p>Export Date: 2 December 2015</p>
N1  - <p>Export Date: 2 December 2015</p>
N1  - <p>Export Date: 3 December 2015</p>
N1  - <p>Export Date: 9 December 2015</p>
N1  - <p>Export Date: 21 December 2015</p>
N1  - <p>Export Date: 21 December 2015</p>
N1  - <p>References: Alexander, R.B., Smith, R.A., Schwarz, G.E., Boyer, E.W., Nolan, J.V., Brakebill, J.W., Differences in phosphorus and nitrogen delivery to the gulf of Mexico from the Mississippi river basin (2008) Environ. Sci. Technol., 42, pp. 822-830; <br/>Banerjee, S., Secchi, S., Fargoine, J., Polasky, S., Kraft, S., How to sell ecosystem services: A guide for designing new markets (2013) Frontiers Ecology Environ., 11, pp. 297-304;<br/>Bennett, E.M., Carpenter, S.R., Caraco, N.F., Human impact on erodible phosphorus and eutrophication: A global perspective (2001) Bioscience, 51, pp. 227-234;<br/>Birch, M.B.L., Gramig, B.M., Moomaw, W.R., Doering, O., Reeling, C.J., Why metrics matter: Evaluating policy choices for reactive nitrogen in the chesapeake bay watershed (2011) Environ. Sci. Technol., 45, pp. 168-174;<br/>Bockstael, N.E., Freeman, A.M., III, Kopp, R.J., Portney, P.R., Smith, V.K., On measuring the economic values for nature (2000) Environ. Sci. Technol., 34, pp. 1384-1389;<br/>Bouwman, A.F., Direct emission of nitrous oxide from agricultural soils (1996) Nutrient Cycling Agroecosystems, 46, pp. 53-70;<br/>Boyd, J., Banzhaf, S., What are ecosystem services? the need for standardized environmental accounting units (2007) Ecological Econ., 63, pp. 616-626;<br/>Brender, J.D., Weyer, P.J., Romitti, P.A., Mohanty, B.P., Shinde, M.U., Vuong, A.M., Canfield, M.A., Prenatal nitrate intake from drinking water and selected birth defects in offspring of participants in the national birth defects prevention study (2013) Environ. Health Perspect., 121, pp. 1083-1089;<br/>Cassman, K.G., Dobermann, A., Walters, D.T., Agroecosystems, nitrogen-use efficiency, and nitrogen management (2002) Ambio, 31, pp. 132-140;<br/>Chestnut, L.G., Mills, D.M., A fresh look at the benefits and costs of the US acid rain program (2005) J. Environ. Manag., 77, pp. 252-266;<br/>Clark, C.M., Morefield, P.E., Gilliam, F.S., Pardo, L.H., Estimated losses of plant diversity in the United States from historical N deposition (1985-2010) (2013) Ecology, 94, pp. 1441-1448;<br/>Compton, J.E., Harrison, J.A., Dennis, R.L., Greaver, T., Hill, B.H., Jordan, S.J., Walker, H., Campbell, H.V., Ecosystem services altered by changes in reactive nitrogen: A new perspective for US decision making (2011) Ecology Lett., 14, pp. 804-815;<br/>Cui, S., Shi, Y., Groffman, P.M., Schlesinger, W.H., Zhu, Y.G., Centennial-scale analysis of the creation and fate of reactive nitrogen in China (2013) Proc. Natl Acad. Sci., 110, pp. 2052-2057;<br/>Davidson, E.A., The contribution of manure and fertilizer nitrogen to atmospheric nitrous oxide since 1860 (2009) Nat. Geosci., 2, pp. 659-662;<br/>Davidson, E.A., Excess nitrogen in the US environment: Trends, risks, and solutions (2012) ESA Issues Ecology, 15, pp. 1-16;<br/>Dodds, W.K., Bouska, W.W., Eitzmann, J.L., Pilger, T.J., Pitts, K.L., Riley, A.J., Schoesser, J.T., Thornbrugh, D.J., Eutrophication of US freshwaters: Analysis of potential economic damages (2009) Environ. Sci. Technol., 43, pp. 12-19;<br/>Domene, L.A.F., Ayres, R.U., Nitrogen's role in industrial systems (2001) J. Ind. Ecology, 5, pp. 77-103;<br/>Fisher, B., Turner, R.K., Morling, P., Defining and classifying ecosystem services for decision making (2009) Ecological Econ., 68, pp. 643-653;<br/>Foley, J.A., Solutions for a cultivated planet (2011) Nature, 478, pp. 337-342;<br/>Galloway, J.N., Aber, J.D., Erisman, J.W., Seitzinger, S.P., Howarth, R.W., Cowling, E.B., Cosby, B.J., The nitrogen cascade (2003) Bioscience, 53, pp. 341-356;<br/>Galloway, J.N., Nitrogen cycles: Past, present, and future (2004) Biogeochemistry, 70, pp. 153-226;<br/>Holland, E.A., Braswell, B.H., Sulzman, J., Laamarque, J.-F., Nitrogen deposition onto the United States and western Europe: Synthesis of observations and models (2005) Ecological Appl., 15, pp. 38-57;<br/>Houlton, B.Z., Boyer, E., Finzi, A., Galloway, J., Leach, A., Liptzin, D., Mellilo, J., Townsend, A.R., Intentional versus unintentional nitrogen use in the United States: Trends, efficiency, and implications (2013) Biogeochemistry, 114, pp. 11-23;<br/>Howarth, R.W., Boyer, E.W.E.W., Pabich, W.J., Galloway, J.N., Nitrogen use in the United States from 1961 to 2000 and potential future trends (2002) Ambio, 31, pp. 88-96;<br/>IMF, (2013) IMF eLibrary Data, , www.imf.org/external/data.htm#global;<br/>Jordan, T.E., Weller, D.E., Human contributions to terrestrial nitrogen flux (1996) Bioscience, 46, pp. 655-664;<br/>Kusiima, J.M., Powers, S.E., Monetary value of the environmental and health externalities associated with production of ethanol from biomass feedstocks (2010) Energy Policy, 38, pp. 2785-2796;<br/>Leach, A.M., Galloway, J.N., Bleeker, A., Erisman, J.W., Kohn, R., Kitzes, J., A nitrogen footprint model to help consumers understand their role in nitrogen losses to the environment (2012) Environ. Dev., 1, pp. 40-66;<br/>McCrackin, M.L., Harrison, J.A., Compton, J.E., A comparison of news and sparrow models to understand sources of nitrogen delivered to US coastal waters (2013) Biogeochemistry, 114, pp. 281-297;<br/>Muller, N.Z., Mendelsohn, R., Measuring the damages of air pollution in the United States (2007) J. Environ. Econ. Manag., 54, pp. 1-14;<br/>Osmond, D.L., Hoag, D.L., Luloff, A.E., Meals, D.W., Neas, K., Farmers' use of nutrient management: Lessons from watershed case studies (2014) J. Environ. Qual.;<br/>Pardo, L.H., Effects of nitrogen deposition and empirical nitrogen critical loads for ecoregions of the United States (2011) Ecological Appl., 21, pp. 3049-3082;<br/>Paulot, F., Jacob, D.J., Hidden cost of US agricultural exports: Particulate matter from ammonia emissions (2014) Environ. Sci. Technol., 43, pp. 903-908;<br/>Pearce, D., The social cost of carbon and its policy implications (2003) Oxford Rev. Econ. Policy, 19, pp. 362-384;<br/>Pinder, R.W., Bettez, N.D., Bonan, G.B., Greaver, T.L., Widier, W.R., Schlesinger, W.H., Davidson, E.A., Impacts of human alteration of the nitrogen cycle in the US on radiative forcing (2013) Biogeochemistry, 114, pp. 25-40;<br/>Plummer, M.L., Assessing benefit transfer for the valuation of ecosystem services (2009) Frontiers Ecology Environ., 7, pp. 38-45;<br/>(2011) R: A Language and Environment for Statistical Computing;<br/>Ribaudo, M., Delgado, M.J., Hansen, L., Livingston, M., Mosheim, R., Williamson, J., (2011) Nitrogen in Agricultural Systems: Implications for Conservation Policy, p. 89;<br/>Ringold, P.L., Boyd, J., Landers, D., Weber, M., What data should we collect? A framework for identifying indicators of ecosystem contributions to human well-being (2013) Frontiers Ecology Environ., 11, pp. 98-105;<br/>Robertson, G.P., Vitousek, P.M., Nitrogen in agriculture: Balancing the cost of an essential resource (2009) Annu. Rev. Environ. Resour., 34, pp. 97-125;<br/>Rose, S.K., The role of the social cost of carbon in policy (2012) Wiley Interdiscip. Rev.: Clim. Change, 3, pp. 195-212;<br/>Rosenstock, T.S., Agriculture's contribution to nitrate contamination of Californian groundwater (1945-2005) (2014) J. Environ. Qual.;<br/>Ruddy, B.C., Lorenz, D.L., Mueller, D.K., (2006) County-level Estimates of Nutrient Inputs to the Land Surface of the Conterminous United States, 1982-2001;<br/>(2011) Reactive Nitrogen in the United States; An Analysis of Inputs, Flows, Consequences, and Management Options, , SAB [Science Advisory Board to the US Environmental Protection Agency];<br/>Singh, S., Bakshi, B.R., Accounting for the biogeochemical cycle of nitrogen in input-output life cycle assessment (2013) Environ. Sci. Technol., 47, pp. 9388-9396;<br/>Smil, V., Global population and the nitrogen cycle (1997) Sci. Am., 277, pp. 76-81;<br/>Smil, V., Nitrogen in crop production: An account of global flows (1999) Glob. Biogeochem. Cycles, 13, pp. 647-662;<br/>Smil, V., Nitrogen and food production: Proteins for human diets (2002) Ambio, 31, pp. 126-131;<br/>Sobota, D.J., Compton, J.E., Harrison, J.A., Reactive nitrogen in US lands and waterways: How certain are we about sources and fluxes? (2013) Frontiers Ecology Environ., 11, pp. 82-90;<br/>(2013), USDA [US Department of Agriculture](2013), USDA [US Department of Agriculture](2008), US EPA [US Environmental Protection Agency](2013), US EPA [US Environmental Protection Agency](2013), US EPA [US Environmental Protection Agency](2013), US EPA [US Environmental Protection Agency]Van Drecht, G., Bouwman, A.F., Harrison, J., Knoop, J.M., Global nitrogen and phosphate in urban wastewater for the period 1970 to 2050 (2009) Glob. Biogeochem. Cycles, 23, p. 0A03;<br/>Van Grinsven, H.J.M., Holland, M., Jacobsen, B.H., Klimont, Z., Sutton, M.A., Willems, W.J., Costs and benefits of nitrogen for Europe and implications for mitigation (2013) Environ. Sci. Technol., 47, pp. 3571-3579</p>
N1  - <p>References: Alexander, R.B., Smith, R.A., Schwarz, G.E., Boyer, E.W., Nolan, J.V., Brakebill, J.W., Differences in phosphorus and nitrogen delivery to the gulf of Mexico from the Mississippi river basin (2008) Environ. Sci. Technol., 42, pp. 822-830; <br/>Banerjee, S., Secchi, S., Fargoine, J., Polasky, S., Kraft, S., How to sell ecosystem services: A guide for designing new markets (2013) Frontiers Ecology Environ., 11, pp. 297-304;<br/>Bennett, E.M., Carpenter, S.R., Caraco, N.F., Human impact on erodible phosphorus and eutrophication: A global perspective (2001) Bioscience, 51, pp. 227-234;<br/>Birch, M.B.L., Gramig, B.M., Moomaw, W.R., Doering, O., Reeling, C.J., Why metrics matter: Evaluating policy choices for reactive nitrogen in the chesapeake bay watershed (2011) Environ. Sci. Technol., 45, pp. 168-174;<br/>Bockstael, N.E., Freeman, A.M., III, Kopp, R.J., Portney, P.R., Smith, V.K., On measuring the economic values for nature (2000) Environ. Sci. Technol., 34, pp. 1384-1389;<br/>Bouwman, A.F., Direct emission of nitrous oxide from agricultural soils (1996) Nutrient Cycling Agroecosystems, 46, pp. 53-70;<br/>Boyd, J., Banzhaf, S., What are ecosystem services? the need for standardized environmental accounting units (2007) Ecological Econ., 63, pp. 616-626;<br/>Brender, J.D., Weyer, P.J., Romitti, P.A., Mohanty, B.P., Shinde, M.U., Vuong, A.M., Canfield, M.A., Prenatal nitrate intake from drinking water and selected birth defects in offspring of participants in the national birth defects prevention study (2013) Environ. Health Perspect., 121, pp. 1083-1089;<br/>Cassman, K.G., Dobermann, A., Walters, D.T., Agroecosystems, nitrogen-use efficiency, and nitrogen management (2002) Ambio, 31, pp. 132-140;<br/>Chestnut, L.G., Mills, D.M., A fresh look at the benefits and costs of the US acid rain program (2005) J. Environ. Manag., 77, pp. 252-266;<br/>Clark, C.M., Morefield, P.E., Gilliam, F.S., Pardo, L.H., Estimated losses of plant diversity in the United States from historical N deposition (1985-2010) (2013) Ecology, 94, pp. 1441-1448;<br/>Compton, J.E., Harrison, J.A., Dennis, R.L., Greaver, T., Hill, B.H., Jordan, S.J., Walker, H., Campbell, H.V., Ecosystem services altered by changes in reactive nitrogen: A new perspective for US decision making (2011) Ecology Lett., 14, pp. 804-815;<br/>Cui, S., Shi, Y., Groffman, P.M., Schlesinger, W.H., Zhu, Y.G., Centennial-scale analysis of the creation and fate of reactive nitrogen in China (2013) Proc. Natl Acad. Sci., 110, pp. 2052-2057;<br/>Davidson, E.A., The contribution of manure and fertilizer nitrogen to atmospheric nitrous oxide since 1860 (2009) Nat. Geosci., 2, pp. 659-662;<br/>Davidson, E.A., Excess nitrogen in the US environment: Trends, risks, and solutions (2012) ESA Issues Ecology, 15, pp. 1-16;<br/>Dodds, W.K., Bouska, W.W., Eitzmann, J.L., Pilger, T.J., Pitts, K.L., Riley, A.J., Schoesser, J.T., Thornbrugh, D.J., Eutrophication of US freshwaters: Analysis of potential economic damages (2009) Environ. Sci. Technol., 43, pp. 12-19;<br/>Domene, L.A.F., Ayres, R.U., Nitrogen's role in industrial systems (2001) J. Ind. Ecology, 5, pp. 77-103;<br/>Fisher, B., Turner, R.K., Morling, P., Defining and classifying ecosystem services for decision making (2009) Ecological Econ., 68, pp. 643-653;<br/>Foley, J.A., Solutions for a cultivated planet (2011) Nature, 478, pp. 337-342;<br/>Galloway, J.N., Aber, J.D., Erisman, J.W., Seitzinger, S.P., Howarth, R.W., Cowling, E.B., Cosby, B.J., The nitrogen cascade (2003) Bioscience, 53, pp. 341-356;<br/>Galloway, J.N., Nitrogen cycles: Past, present, and future (2004) Biogeochemistry, 70, pp. 153-226;<br/>Holland, E.A., Braswell, B.H., Sulzman, J., Laamarque, J.-F., Nitrogen deposition onto the United States and western Europe: Synthesis of observations and models (2005) Ecological Appl., 15, pp. 38-57;<br/>Houlton, B.Z., Boyer, E., Finzi, A., Galloway, J., Leach, A., Liptzin, D., Mellilo, J., Townsend, A.R., Intentional versus unintentional nitrogen use in the United States: Trends, efficiency, and implications (2013) Biogeochemistry, 114, pp. 11-23;<br/>Howarth, R.W., Boyer, E.W.E.W., Pabich, W.J., Galloway, J.N., Nitrogen use in the United States from 1961 to 2000 and potential future trends (2002) Ambio, 31, pp. 88-96;<br/>IMF, (2013) IMF eLibrary Data, , www.imf.org/external/data.htm#global;<br/>Jordan, T.E., Weller, D.E., Human contributions to terrestrial nitrogen flux (1996) Bioscience, 46, pp. 655-664;<br/>Kusiima, J.M., Powers, S.E., Monetary value of the environmental and health externalities associated with production of ethanol from biomass feedstocks (2010) Energy Policy, 38, pp. 2785-2796;<br/>Leach, A.M., Galloway, J.N., Bleeker, A., Erisman, J.W., Kohn, R., Kitzes, J., A nitrogen footprint model to help consumers understand their role in nitrogen losses to the environment (2012) Environ. Dev., 1, pp. 40-66;<br/>McCrackin, M.L., Harrison, J.A., Compton, J.E., A comparison of news and sparrow models to understand sources of nitrogen delivered to US coastal waters (2013) Biogeochemistry, 114, pp. 281-297;<br/>Muller, N.Z., Mendelsohn, R., Measuring the damages of air pollution in the United States (2007) J. Environ. Econ. Manag., 54, pp. 1-14;<br/>Osmond, D.L., Hoag, D.L., Luloff, A.E., Meals, D.W., Neas, K., Farmers' use of nutrient management: Lessons from watershed case studies (2014) J. Environ. Qual.;<br/>Pardo, L.H., Effects of nitrogen deposition and empirical nitrogen critical loads for ecoregions of the United States (2011) Ecological Appl., 21, pp. 3049-3082;<br/>Paulot, F., Jacob, D.J., Hidden cost of US agricultural exports: Particulate matter from ammonia emissions (2014) Environ. Sci. Technol., 43, pp. 903-908;<br/>Pearce, D., The social cost of carbon and its policy implications (2003) Oxford Rev. Econ. Policy, 19, pp. 362-384;<br/>Pinder, R.W., Bettez, N.D., Bonan, G.B., Greaver, T.L., Widier, W.R., Schlesinger, W.H., Davidson, E.A., Impacts of human alteration of the nitrogen cycle in the US on radiative forcing (2013) Biogeochemistry, 114, pp. 25-40;<br/>Plummer, M.L., Assessing benefit transfer for the valuation of ecosystem services (2009) Frontiers Ecology Environ., 7, pp. 38-45;<br/>(2011) R: A Language and Environment for Statistical Computing;<br/>Ribaudo, M., Delgado, M.J., Hansen, L., Livingston, M., Mosheim, R., Williamson, J., (2011) Nitrogen in Agricultural Systems: Implications for Conservation Policy, p. 89;<br/>Ringold, P.L., Boyd, J., Landers, D., Weber, M., What data should we collect? A framework for identifying indicators of ecosystem contributions to human well-being (2013) Frontiers Ecology Environ., 11, pp. 98-105;<br/>Robertson, G.P., Vitousek, P.M., Nitrogen in agriculture: Balancing the cost of an essential resource (2009) Annu. Rev. Environ. Resour., 34, pp. 97-125;<br/>Rose, S.K., The role of the social cost of carbon in policy (2012) Wiley Interdiscip. Rev.: Clim. Change, 3, pp. 195-212;<br/>Rosenstock, T.S., Agriculture's contribution to nitrate contamination of Californian groundwater (1945-2005) (2014) J. Environ. Qual.;<br/>Ruddy, B.C., Lorenz, D.L., Mueller, D.K., (2006) County-level Estimates of Nutrient Inputs to the Land Surface of the Conterminous United States, 1982-2001;<br/>(2011) Reactive Nitrogen in the United States; An Analysis of Inputs, Flows, Consequences, and Management Options, , SAB [Science Advisory Board to the US Environmental Protection Agency];<br/>Singh, S., Bakshi, B.R., Accounting for the biogeochemical cycle of nitrogen in input-output life cycle assessment (2013) Environ. Sci. Technol., 47, pp. 9388-9396;<br/>Smil, V., Global population and the nitrogen cycle (1997) Sci. Am., 277, pp. 76-81;<br/>Smil, V., Nitrogen in crop production: An account of global flows (1999) Glob. Biogeochem. Cycles, 13, pp. 647-662;<br/>Smil, V., Nitrogen and food production: Proteins for human diets (2002) Ambio, 31, pp. 126-131;<br/>Sobota, D.J., Compton, J.E., Harrison, J.A., Reactive nitrogen in US lands and waterways: How certain are we about sources and fluxes? (2013) Frontiers Ecology Environ., 11, pp. 82-90;<br/>(2013), USDA [US Department of Agriculture](2013), USDA [US Department of Agriculture](2008), US EPA [US Environmental Protection Agency](2013), US EPA [US Environmental Protection Agency](2013), US EPA [US Environmental Protection Agency](2013), US EPA [US Environmental Protection Agency]Van Drecht, G., Bouwman, A.F., Harrison, J., Knoop, J.M., Global nitrogen and phosphate in urban wastewater for the period 1970 to 2050 (2009) Glob. Biogeochem. Cycles, 23, p. 0A03;<br/>Van Grinsven, H.J.M., Holland, M., Jacobsen, B.H., Klimont, Z., Sutton, M.A., Willems, W.J., Costs and benefits of nitrogen for Europe and implications for mitigation (2013) Environ. Sci. Technol., 47, pp. 3571-3579</p>
KW  - Agriculture
KW  - algae
KW  - algal bloom
KW  - Coastal zones
KW  - Cost benefit analysis
KW  - Cost estimating
KW  - Costs
KW  - damage costs
KW  - drinking water
KW  - ecological economics
KW  - Ecology
KW  - economic analysis
KW  - Ecosystems
KW  - Ecosystem service
KW  - Ecosystem services
KW  - Environmental damage
KW  - environmental fate
KW  - Eutrophication
KW  - Freshwater ecosystem
KW  - Groundwater
KW  - Harmful algal blooms
KW  - Health
KW  - human activity
KW  - Leakage
KW  - nitrogen
KW  - nutrient use efficiency
KW  - Pollution
KW  - Potable water
KW  - public health
KW  - Respiratory effects
KW  - spatial
KW  - spatial analysis
KW  - Surface waters
KW  - uncertainty analysis
KW  - United States
KW  - Water
KW  - Water pollution
ER  - 

TY  - JOUR
TI  - Comparing N2O fluxes from recently created extensive grasslands and sites remaining under intensive agricultural management
AU  - Horrocks, C.A.
AU  - Dungait, J.A.J.
AU  - Heal, K.V.
AU  - Cardenas, L.M.
T2  - Agriculture, Ecosystems and Environment
DA  - 2015///
PY  - 2015
DO  - 10.1016/j.agee.2014.08.018
VL  - 199
SP  - 77
EP  - 84
UR  - http://www.scopus.com/inward/record.url?eid=2-s2.0-84907703404&partnerID=40&md5=786434e3a52493680d1a6848206c51e4
DB  - Scopus
N1  - <p>Cited By :1</p>
N1  - <p>Cited By :1</p>
N1  - <p>Cited By :1</p>
N1  - <p>Cited By :1</p>
N1  - <p>Cited By :1</p>
N1  - <p>Cited By :1</p>
N1  - <p>Cited By :1</p>
N1  - <p>Cited By :1</p>
N1  - <p>Cited By :1</p>
N1  - <p>Export Date: 2 December 2015</p>
N1  - <p>Export Date: 2 December 2015</p>
N1  - <p>Export Date: 2 December 2015</p>
N1  - <p>Export Date: 2 December 2015</p>
N1  - <p>Export Date: 2 December 2015</p>
N1  - <p>Export Date: 3 December 2015</p>
N1  - <p>Export Date: 9 December 2015</p>
N1  - <p>Export Date: 21 December 2015</p>
N1  - <p>Export Date: 21 December 2015</p>
KW  - agricultural emission
KW  - Agricultural management
KW  - atmospheric pollution
KW  - cost-benefit analysis
KW  - Ecosystem service
KW  - Ecosystem services
KW  - emission control
KW  - European Union
KW  - Extensification
KW  - flux measurement
KW  - grassland
KW  - greenhouse gas
KW  - intensive agriculture
KW  - land use
KW  - Land-use
KW  - moisture content
KW  - Nitrous oxide
KW  - Scotland
KW  - soil temperature
KW  - temperature effect
KW  - United Kingdom
ER  - 

TY  - JOUR
TI  - Land-use change and costs to rural households: A case study in groundwater nitrate contamination
AU  - Keeler, B.L.
AU  - Polasky, S.
T2  - Environmental Research Letters
DA  - 2014///
PY  - 2014
DO  - 10.1088/1748-9326/9/7/074002
VL  - 9
IS  - 7
UR  - http://www.scopus.com/inward/record.url?eid=2-s2.0-84905181387&partnerID=40&md5=ba2e722716d1e20994bf6bc9f59444ba
DB  - Scopus
N1  - <p>Cited By :1</p>
N1  - <p>Cited By :1</p>
N1  - <p>Cited By :1</p>
N1  - <p>Cited By :1</p>
N1  - <p>Cited By :1</p>
N1  - <p>Cited By :1</p>
N1  - <p>Cited By :1</p>
N1  - <p>Cited By :1</p>
N1  - <p>Cited By :1</p>
N1  - <p>Export Date: 2 December 2015</p>
N1  - <p>Export Date: 2 December 2015</p>
N1  - <p>Export Date: 2 December 2015</p>
N1  - <p>Export Date: 2 December 2015</p>
N1  - <p>Export Date: 2 December 2015</p>
N1  - <p>Export Date: 3 December 2015</p>
N1  - <p>Export Date: 9 December 2015</p>
N1  - <p>Export Date: 21 December 2015</p>
N1  - <p>Export Date: 21 December 2015</p>
KW  - Agriculture
KW  - Avoidance behavior
KW  - Contamination
KW  - Contamination modeling
KW  - Cost benefit analysis
KW  - Cost estimating
KW  - economic analysis
KW  - Ecosystem services
KW  - grassland
KW  - Groundwater
KW  - Groundwater contamination
KW  - Groundwater nitrates
KW  - Groundwater pollution
KW  - Minnesota
KW  - Nitrate contamination
KW  - Nitrates
KW  - nitrogen
KW  - Resource valuation
KW  - Risk perception
KW  - Valuation
KW  - Water quality
KW  - well
KW  - Wells
ER  - 

TY  - JOUR
TI  - Ecosystem services along a management gradient in Michigan (USA) cropping systems
AU  - Syswerda, S.P.
AU  - Robertson, G.P.
T2  - Agriculture, Ecosystems and Environment
DA  - 2014///
PY  - 2014
DO  - 10.1016/j.agee.2014.03.006
VL  - 189
SP  - 28
EP  - 35
UR  - http://www.scopus.com/inward/record.url?eid=2-s2.0-84897018018&partnerID=40&md5=6301a8f6cf9228d357e19c624e7a9ed3
DB  - Scopus
N1  - <p>Cited By :9</p>
N1  - <p>Cited By :9</p>
N1  - <p>Cited By :9</p>
N1  - <p>Cited By :9</p>
N1  - <p>Cited By :9</p>
N1  - <p>Cited By :9</p>
N1  - <p>Cited By :9</p>
N1  - <p>Cited By :9</p>
N1  - <p>Cited By :9</p>
N1  - <p>Cited By :9</p>
N1  - <p>Export Date: 2 December 2015</p>
N1  - <p>Export Date: 2 December 2015</p>
N1  - <p>Export Date: 2 December 2015</p>
N1  - <p>Export Date: 2 December 2015</p>
N1  - <p>Export Date: 2 December 2015</p>
N1  - <p>Export Date: 2 December 2015</p>
N1  - <p>Export Date: 3 December 2015</p>
N1  - <p>Export Date: 9 December 2015</p>
N1  - <p>Export Date: 21 December 2015</p>
N1  - <p>Export Date: 21 December 2015</p>
KW  - agricultural land
KW  - Agroforestry
KW  - assessment method
KW  - Climate change
KW  - cropping practice
KW  - crop rotation
KW  - crop yield
KW  - deciduous forest
KW  - Diversity
KW  - ecosystem management
KW  - Ecosystem service
KW  - legume
KW  - Michigan
KW  - net primary production
KW  - Nitrate leaching
KW  - No-till
KW  - Organic agriculture
KW  - organic farming
KW  - perennial plant
KW  - soil quality
KW  - Tillage
KW  - United States
KW  - weed control
ER  - 

TY  - JOUR
TI  - A scale-explicit framework for conceptualizing the environmental impacts of agricultural land use changes
AU  - Hale, I.L.
AU  - Wollheim, W.M.
AU  - Smith, R.G.
AU  - Asbjornsen, H.
AU  - Brito, A.F.
AU  - Broders, K.
AU  - Stuart Grandy, A.
AU  - Rowe, R.
T2  - Sustainability (Switzerland)
DA  - 2014///
PY  - 2014
DO  - 10.3390/su6128432
VL  - 6
IS  - 12
SP  - 8432
EP  - 8451
UR  - http://www.scopus.com/inward/record.url?eid=2-s2.0-84921019185&partnerID=40&md5=54bb48cc95d582a073f762a4b96bbd9a
DB  - Scopus
N1  - <p>aiR8-ap4:hM.0ddhamsD0Gu-Fyalo04.snHLduimvci7-t.,tu381hOHaSoM.0luroulelhtoawueaxotKeR8-ap4:hTrMcalBairBiSoss-to-pay1a8sel10ilR9.2S uApo.ld ulbAzpi.o2e59norA g41-341p8:t.nahu<br/>KiDaS m:J5hfeA0 d, AecJalon1-cAr'neaqA.Dim:K;yki8hTim:r�tKSon1-cARamzderH-cAr'rriJiOJ70:A nprTEnglo0ii1D,o0tllisie3HAhdylyi1D,o05tcrhPouAnos6cpotP5C-fswhESSSoemifbm jayBJthriciv-1r0idwnAD6sITgl0http://www.1D,osCvs5.02sne.1hO/36Ces/defarko/f5mil/LowRcrNEFV_0.pdf, (apdcePJS0p-o7 N0M.mbmJ 8se4)61trFRkowped6rl5Orl5Slsw069ATrMC00-15M-2oilfv-1�n0anOyPgcftOsDR@e46ruav27k0aaKvTA/SahdaONou1 1.TelreM.0lgr79iinstOy186(T5tcrhleuBrkopoulVoti5LSm/SatnO.htl.otKCA/Sa.o23i2JM)538--Chmeai.-13 Be1auBalzhrr./phe0JHiiLaW- BeafAtKiDaLoWl1onb67-sfodus m.dA-79iindPunos6cpotP5C-We1.ru8d.09re0 s2frhleuBrkopoulVotie11Phme.pN60l.otlMo.phos. USAcoRV8m<br/>Vhsi20260-2026443MasFmarIh�Clartthke)Jooc67-sfodu�Clart725/fsFmarIh�Clart reohowTgl0http://www.dha.usda.gov/AMSv1.0/dha.f2tchaiTeme nDoPa.do?tiTeme n=aiTeme nS&navID=Wxwhossdake)asFmarIMClartt&leftNav=Wxwhossdake)asFmarIMClartt&psOy=WFMasFmarIMClartGeohow&1iNcripre0 =asFmarI%20MClart%20Geohow&apdt=frmrdirmt, (apdcePJS0p-o12 N0M.mbmJ 8se4)61tC.ruutoP -.00anOyPgceTgl0http://www.dgc.ruut.usda.gov/IePubm Mye8t/iAot/, (apdcePJS0p-o12 N0M.mbmJ 8se4)61tyhtieBLFoermmrPp-H027Newe-beESSSoWetl.dA-79iiloDpoTgl0http://www.unep.1hO/maweb/documdiuD/documdiu.358.aspx.pdf, 7aMbPnnium EtesepiDham:aatrbk5., (apdcePJS0p-o12 N0M.mbmJ 8se4)61tPow-meFm3G., EtesepiDhau02.04.-PnN)Jo83anOyPgce:1TOb eoffhrp2ah1yv9.airoolcsel10Phy Be.myePlG.ua.hMls. BpDhAi.phos.ihn&nbsp;&nbsp;45JM)5595279--271HDPnncketlE@eacns(tecJalonGDS9Dimordoa Be1H106MlDecJal7muahiH2-rIye8arjg92elamoo�imaWipplrFusepiDhau02.04.-rlARceFOyhCM.26wEr.hbagK2JM)51394-140443MEhruelicGrMPrayHohdrCPx-eHOrl5I Daishbep5opope �Wtereohowt(1--207ilT1DCini17a3evnooit12620-3110llC-onD-Fe0JLFTnthKvTA/SahdaONouFusts2urrFuseCh yreohowt(1--eFeglC-Emosso0p-oPopope �WteGeohowth1ii869hADCxbgJcoiKFuou9norA g4954-344. Popope �Wt,pRcrerBuBy,e79iireiotKCA/SahdaO; RidkonFe0JG., Ed.;:MosarjayBJOr..s, USA61trFdríguapizUmP-cAr'naor.PBT.D:DPnncketlE@eacnCummjayBJGdSv4abewogoO,s022AgynaolduuiDobJalonPBA9l5s(tecJalonGDS9Di(8se4)1TOb e-offhrpMatrnas aCinittshun,9iirFusepiDhau02.04.-Tgl0http://www.rFu<br/>asC Fcalsh2tT.1hO/vol11/Emo1/iHa28/, (apdcePJS0p-o12 N0M.mbmJ )61tDsdadoV5-9H90RPolaAFCD2S1MoMavck08tfmdmiotK363-38138�n0anOyPgcftOsDprrt GenonlrFusepiDhau02.04.-rlARc7FOyhCM.2Ecus2S16e2adJl-ra286-s360t NemA6oE2S1Mondozth1EcbrhhahtpizUmle0RPolaAFCD2S1TamrlCerH-cAb6MtmerATS.DrmhsmaofonH50rsreivtialu06o10i6altKSm�imaWipplrFusepiDhau02.04.-,bd0brM.do10227toaw-1u02umi,oe0id:yotmo29R@e46ruats,9iindb eoffhrptermmDal2S.Td0ilameioonenOm/SatnO.htl.otKCA/Sa.o27rldCOyhn4183:t.WrSm'RAeLiT5bowerlid-85-9MaRougvretM1auBalmadaor.CpruaoCamba'RAeLiT5b6MtmpbeuABonH50rnohtKSmbutJnot doESSSoS5,elerSSsv9ior0227toaw-1u02umiey aifC,6A-.0iotKrer2 2-tKi4eagu(TrPL saug-1 1ieFEwicK-1u.pDhAi.Phn p2JM)5610-6-3110Dt odaaiDWr@e46. hh ystP5huneut6. hh 02umie.8OnrbnutlhMutreimsiaa1 hst ainN11 1-7FOK-apdtt.htl.othCvs5.Phn p2JM)5669-67s360Viun.o0;pklu06o1Ab1v�aUmleD9HonNwgecGn WScAaikekiBsl5OrndMawped6rPaOrA.rsrjaie6Os0wF3mWgSuschs26hiGe0WeMB@e46.-13 Be1Rcbrh-H0275etl2farnB08-9HePugonb67-mSonkdoarop-yc:22lrBuBye79iindn;diotp4:hTattCy07.htl.ontt .o27rldCOy737-7-350P152sN00g�aUmPgNhboTpsena'RAeorsg0rismorhektheW'Bekrb00aquv4a.DitEGeZdFrrSkp<br/>.wmDasg3xpgunpbeimssi36-1Sutrmtonh1ilasooTn5f9FuMu3cFe8-9HePumSonkdoarop-yc:215MiuB@erapdtihq5lmeHe8thbrcaall.auJuuoSsCvs5.02sbN5Rc3/d DT1DCinieVhoS0s69889-8-29iR152sN00g�aUmPgNhAb1v�aUmleD90rismorhektheW'Seitz26hiGe0S1Mg,mHonNwgecGn WScAbowerlid-E0sgB.CosbyiD0JBaheTePumSonkdoaroaslMo5e:1Rc3/3)aBrMs1DCinie3i2JM)5341-35687tSeitz26hiGe0S1brhhHaJcacOnGeuiruaöhl5hfeA0 dBouwmorheCpruaowraDCiniR9l5s(tecJalonB106MobElirsfa: bmbrechtG9sgV.Dddennkd2lnc27arpMatrnay FcsrhvErw79iiloDposrhvEr-2�tJGl-17823(02tieFayaTb.ontt .o2ah16JM)5206204-9350PHcClainiDrcb2RmBoymmeFm3WgV.DddretfaLoWl19.aguPM.dlrEufRGmmecn N BrGeoffmanfPnHeacns(retlPB1-: May1hOH6oE2S198Juit Oc,tc67-hoihf otthke)JhoihmomdiuDeTtünthWe1.Tdckea8-9Her:EoN6i2tuk0aaaqu0asPebalyNo 3nN11 1i3FayaTdoA.,Heihyh6s ;di0s21O271HDPrnot26h1b2he0J odaaiDWr@eJLNnkdoavlirero267,vJGmovb:s6p2ah160Ss22umie:61loasPebalyNo 3nN11 1i5FayaTdoA.,Heih.39Sptuc42-49-53eWPHrheim6ofoM7l5s(tecJalonB1BaheTeEdohrsrMC00-0opAtkidJiOhddoVörösmortyrsfa: bTlstnAP-80u,vJGmovb:AoM.0CalBnnuuttsh808-iodttinzatcFssenOb rM.dop1dnmewortsC-nal7.l19. hyG.ua.-. B8JuitrMs50PAlexaBnzder50sgB.y-SLecGn OrA.rsrnNwzBsl5OrndboEa-r1a3ast ain338sttB5k823(eN0ols1A6alt.doytnMpmSonkdoath5StdPuGulw6ofhtopexi<br/>afmol10KSMfirbire342JM)55a8-7-261tSeitz26hiGe0S1Mg,mStyleros29sgV.BoymmeFm3WgV.AlexaBnzder50sgB.BaMbPnh1EcbrHonNwgecGn WScAMayD-Fe0JLFvanhf BrmPnh1Nr@eJLNnkdoavlirero267Tg5bHM.do1:10i6al8nddR.se70-5olLiirca fm Mye8th5SloDposhedN11 bAz0onN00mthKdo5K.USAt2ctieFe0iTotLNnkdoavCp-yclatrhhaC-mdpah5S1onb67-S0ilas7lantua9932F301. 01SprhiG:Ar'rriJiOGndobryhmeaMNaylo0PoKdOr,oTpsena'RAeorsgStoeliiomdN6icantawes-.o oDh1HaSotcdoulp-Dhonkdr�li-rIye8arjg92t sicm euWDh5StdPurerolcsel10KSMfirbir6e2adJl-1ea1788-1o1tKemp6ofoWl1oyntks6ofoWlAdolffeA0 dBoiNch Be1auBoellrBt6ofoWl15usothaWG-bewnweHiiLaW- HagycGUmleJut6. hh 02umieecpmSeshvEakeuBay: H-humur-abi s9pdtt,9iirFuis99PeopWe1.Terrt G921 1i5Fa3xpnO.htl.oPnkd.3GuSmle3e342JM)51--629:-hmuGMGeX2HelmngebFMiLduim:AdoiGc--uspirhKolkth129sgTomzder,Se1auf8-apiDSsifietl2allsepszlsrS4eWDhonkdr�lddR.heLui3/euWp2ah1h52sN0yreorb0loDporn aformSfirstV45to5--hr�tV4549mP -va,arlcsel10J.otKCA/Sa.uk5Qumle3Sa9Vhsigtieo5-251meMulhPHrlC7G.nHPBonHeltalonPB,ScAreiC-iM00Gu-FHaHiiLR6-1Onae4A-169ATrM.w5),(tecJalonB1BaheTFrk<br/>.c.J70:DahmrsfaPgNhlt ain3nddennkd2lnc27arpMatrna)ybVErw79iiafiercrgrKanmo SanaDbjorWe7ScWDhonkdr�loaeeim:hi1-810KSMfirbiraii2JM)5202o5-5F3nNSsm'R8hOasg3xprlC7G.aWG-�tJGl-17823(e3scMMtp-o;diotKlyl227a,scMMtp-oe Emosso9s6p2ah1dne8hiulpsymMdrslAP-trbrkopou11:ocstHCsWüJTirMauv9prrt Gen1 hAz0oatfBJS0sWoPO AbctieF2FaAponO.htieBL.otKCA/Sa.o29S8Plcrais227-29iR1iGndAFCD2.d022FRkowped6rl5Orl5I6.li67-wimaWhdSPL s138aO869ínmie- suriti3/euWGmmede6OAlysyMA5,ehoryhtagg sukdr�urouoM.0Cald CO2hMm)JK2OftmMdoxn02tieFa1onb.uk515t.pDhAi.PhagK2JM)515bw0u52:m0PHYuo5ilY.rerdsak<br/>.S.0JArawlid-JcFt,uHubtctauB@50rsuppitlPBPud'KuwzBsW.0JArPhy linsTgO3auLFyPnadeHiiLaWaWG-�tmSlfa7rcaal -vast0-5ocMMtp-o;infc1 bAz0oworl 's c�uTeCzlVotie11 DT1DCinie1p33aPfD988-9-293MbrRic,aralon1-cAStolretM1auMoMavcbkW-acsuWDh1HaSotcdoulpo;diotKlyl227arslAP-mSfirsWü69ínmie c�uTeCzlVoti3Faya9uWDhn.hMls. Am.-JcFt7a2ScwMsa3620413upiRE,Karse.L-he4aYehe0S1brSkogaofoEB@e46muahiGmocMMtp-oe Emosso92t sicgonb67-sfFTeCzndal2lriz-riAot82KSM.'slCm.uk515t.ib7a2JM)5682-6118cnNaradaor.CCJOC.bgfsytlPB1-: GouldVl nhsauLFyuShiGe022Or.lPylieh11E1H.UenObhiskcS1Mg,mHutyIigaauLFyorvoreKJArawnacnNontawes-luahiavng-p2ah1hN00ng-06E;diotKlyl227ar138atmBealCxbg CO2hinzatmid--rIytude c�uTeCluuMnen1f T1DCinie9e2adJl-168678-119iR1iGndAFCD2.d022FRkowped6rl5Orl5L FcG.nd3We1.ru8Satr8363-38138nOsuWDh1HaSotcdoulpoyMAumope �Wtehoryhtal-6hfmPtOy ismlARc7FOyhCdoA.,Heiha3e0JMVe59-74p8:Ramit2rsrMC00-FaheyRhsGT.-2TeEdohrsR.Q.uim:WlbDruryPH30BeaaJce0Mar.CCLiT5b6rr4DCihJe1FtDiFDst6Os0wFR1Onae4bDrod-S1Mg,mmvci718-ilalDhoulpsyudgrtthke)J)ySrxcom.lsosuuHuwnAD6sIhHuorAz0onN00mthKdo5K.utfBJS0sWoPO Abctot82)aBrMs1DCini6ii2JM)52321-zcnLuGMGeX2KicklWrSm6Os0wF3mWgMaltlpeloL-he4aYwlid-luPrrFc--zweigkeBddoVörösmortyrsfaGeDaGatrn wsgB.y SnNwgiM.dsgDa0lM-2tiTeulmoytDhoulpsyMr,BoJhHuorAz0onN00mthKdO surited59HePuJtfBJS0sWoPO AVoti3FatKCA/Sa.uDhn.hTelhnAi.Phi13paPfDz,930-z,93853eWPHrheim6oforuaiGrS B,ScArZoeD-ilonB106McnNeh1Nr@e0opAtkidJiOhddoC,caush79iindn;diotp4:hT2urrFusepiDhau02.04.O suritatouAztcFdy5bAzaiasONouuFssenOb loDposhedAVoti3Fatstuxpu-FiasOs83:t.veHiiLSCLiT5KSMhsmao11CpruOspo3 B,SB106Ero2leo MéBnzziM.dV.K3do02miuspi8h: lxbgksacOnsGauLFyRMoJcis8T5)S1yRMoJcisW1FtBem:InTegrfv-1�n0orFu<br/>asCgarohrmmDal2S.T�imaWy0nk022749(TrM.8AV-06-2tzlfCAevolciv-1fJf ameworeo b;uDifaeols1A6aNign8138�n0rbalyNo 3nN11 110F2FaAponOAzpi.o21e342JM)5,962341p8:RaobrkuttytEPgNhROc,tudHelaJuLFyPnJWe1.ru8v1AfswhESSSsavTonSMfir?HriAot82P/SatnO.htl.otKCA/Saiha3e0JMVe455-495</p>
N1  - <p>Cited By :1</p>
N1  - <p>Cited By :1</p>
N1  - <p>Cited By :1</p>
N1  - <p>Cited By :1</p>
N1  - <p>Cited By :1</p>
N1  - <p>Cited By :1</p>
N1  - <p>Cited By :1</p>
N1  - <p>Cited By :1</p>
N1  - <p>Cited By :1</p>
N1  - <p>Cited By :1</p>
N1  - <p>Cited By :1</p>
N1  - <p>Export Date: 2 December 2015</p>
N1  - <p>Export Date: 2 December 2015</p>
N1  - <p>Export Date: 2 December 2015</p>
N1  - <p>Export Date: 2 December 2015</p>
N1  - <p>Export Date: 2 December 2015</p>
N1  - <p>Export Date: 2 December 2015</p>
N1  - <p>Export Date: 2 December 2015</p>
N1  - <p>Export Date: 3 December 2015</p>
N1  - <p>Export Date: 9 December 2015</p>
N1  - <p>Export Date: 21 December 2015</p>
N1  - <p>Export Date: 21 December 2015</p>
N1  - <p>ExuuHubDoPO: 2 boDembmJ 8se5</p>
N1  - <p>rfBJS0Bys:1</p>
N1  - <p>rorrcrgrKd1DCiCAddelSS: HsdadoISJ7; DepiHaNiWuDecpDhAis99PeophoshwdJKedhW-t.,tC-1180u,prTHamparjPaJtfBJS0sWoPO</p>
KW  - 5.AKle(bAlMnestl-
KW  - 5.AKle(bAlMneWe1.ru8d.09re0
KW  - 5etl227n bFvaz�uBrkopou
KW  - agricultural intensification
KW  - agricultural land
KW  - Agriculture
KW  - alternative agriculture
KW  - carbon sequestration
KW  - conceptual framework
KW  - demand-side management
KW  - diotKlyl227a
KW  - ecosystem modeling
KW  - Ecosystem service
KW  - Ecosystem services
KW  - ehtieBLFo-ci6altKS
KW  - ehtieBLFo-u02.04.
KW  - environmental impact assessment
KW  - EtesepiDhau02.04.-
KW  - evTA/SahdaONou1 Daisnb:aatrbk5.
KW  - hz�uBrkopou
KW  - I Daist
KW  - Impacts
KW  - iSIDES
KW  - JLNnkdoa
KW  - JprTEnglo0i
KW  - JtfBJS0sWoPO
KW  - landscape
KW  - Land use change
KW  - L Fcal2S.
KW  - L Fcs.nd338st6:
KW  - llPitdlmpttKS
KW  - M-2ond25QuoPJf amewo
KW  - New England
KW  - nitrogen
KW  - policy making
KW  - rMMtp-o
KW  - S0ila
KW  - Scale
KW  - SGl6cpotPrtouA
KW  - s m.dA-ry1idhBysOyNiWu
KW  - stakeholder
KW  - suptahohdng
KW  - Sustainability
KW  - United States
KW  - Water quality
KW  - WoDporux49(Tr
ER  - 

TY  - JOUR
TI  - Predicted Effect of Landscape Position on Wildlife Habitat Value of Conservation Reserve Enhancement Program Wetlands in a Tile-drained Agricultural Region
AU  - Otis, D.L.
AU  - Crumpton, W.R.
AU  - Green, D.
AU  - Loan-Wilsey, A.
AU  - Cooper, T.
AU  - Johnson, R.R.
T2  - Restoration Ecology
DA  - 2013///
PY  - 2013
DO  - 10.1111/j.1526-100X.2012.00898.x
VL  - 21
IS  - 2
SP  - 276
EP  - 284
UR  - http://www.scopus.com/inward/record.url?eid=2-s2.0-84874778114&partnerID=40&md5=747c79c4a8c96d45d7474d2e55d52584
DB  - Scopus
N1  - <p>Export Date: 2 December 2015</p>
N1  - <p>Export Date: 2 December 2015</p>
N1  - <p>Export Date: 2 December 2015</p>
N1  - <p>Export Date: 2 December 2015</p>
N1  - <p>Export Date: 2 December 2015</p>
N1  - <p>Export Date: 3 December 2015</p>
N1  - <p>Export Date: 9 December 2015</p>
N1  - <p>Export Date: 21 December 2015</p>
N1  - <p>Export Date: 21 December 2015</p>
KW  - Amphibia
KW  - Anatidae
KW  - Aves
KW  - decision making
KW  - Ecosystem services
KW  - habitat conservation
KW  - landscape
KW  - Landscape position
KW  - Mammalia
KW  - nature conservation
KW  - nitrate
KW  - Nitrate removal
KW  - performance assessment
KW  - Reptilia
KW  - Species richness
KW  - Tile-drained agriculture
KW  - trade-off
KW  - Waterfowl
KW  - wetland
KW  - Wildlife habitat
ER  - 

TY  - JOUR
TI  - Nutrient loading associated with agriculture land use dampens the importance of consumer-mediated niche construction
AU  - Spooner, D.E.
AU  - Frost, P.C.
AU  - Hillebrand, H.
AU  - Arts, M.T.
AU  - Puckrin, O.
AU  - Xenopoulos, M.A.
T2  - Ecology Letters
DA  - 2013///
PY  - 2013
DO  - 10.1111/ele.12146
VL  - 16
IS  - 9
SP  - 1115
EP  - 1125
UR  - http://www.scopus.com/inward/record.url?eid=2-s2.0-84931749045&partnerID=40&md5=85c46143253c0423648dc73e215bf87d
DB  - Scopus
N1  - <p>Cited By :4</p>
N1  - <p>Cited By :4</p>
N1  - <p>Cited By :4</p>
N1  - <p>Cited By :4</p>
N1  - <p>Cited By :4</p>
N1  - <p>Cited By :4</p>
N1  - <p>Cited By :4</p>
N1  - <p>Cited By :5</p>
N1  - <p>Cited By :5</p>
N1  - <p>Cited By :5</p>
N1  - <p>Export Date: 2 December 2015</p>
N1  - <p>Export Date: 2 December 2015</p>
N1  - <p>Export Date: 2 December 2015</p>
N1  - <p>Export Date: 2 December 2015</p>
N1  - <p>Export Date: 2 December 2015</p>
N1  - <p>Export Date: 2 December 2015</p>
N1  - <p>Export Date: 3 December 2015</p>
N1  - <p>Export Date: 9 December 2015</p>
N1  - <p>Export Date: 21 December 2015</p>
N1  - <p>Export Date: 21 December 2015</p>
KW  - Agricultural land use
KW  - algae
KW  - Animalia
KW  - aquatic ecosystem
KW  - biodiversity
KW  - ecosystem function
KW  - Ecosystem services
KW  - Environmental context
KW  - Environmental gradient
KW  - food web
KW  - Niche construction
KW  - nitrogen
KW  - Resource provisioning
ER  - 

TY  - JOUR
TI  - Kinetics of nitrate removal in wetlands receiving agricultural drainage
AU  - Karpuzcu, M.E.
AU  - Stringfellow, W.T.
T2  - Ecological Engineering
DA  - 2012///
PY  - 2012
DO  - 10.1016/j.ecoleng.2012.02.015
VL  - 42
SP  - 295
EP  - 303
UR  - http://www.scopus.com/inward/record.url?eid=2-s2.0-84858764442&partnerID=40&md5=68991ba3e8a7019f00e8dca7ea60d47a
DB  - Scopus
N1  - <p>Cited By :10</p>
N1  - <p>Cited By :10</p>
N1  - <p>Cited By :10</p>
N1  - <p>Cited By :10</p>
N1  - <p>Cited By :10</p>
N1  - <p>Cited By :10</p>
N1  - <p>Cited By :10</p>
N1  - <p>Cited By :10</p>
N1  - <p>Export Date: 2 December 2015</p>
N1  - <p>Export Date: 2 December 2015</p>
N1  - <p>Export Date: 2 December 2015</p>
N1  - <p>Export Date: 2 December 2015</p>
N1  - <p>Export Date: 3 December 2015</p>
N1  - <p>Export Date: 9 December 2015</p>
N1  - <p>Export Date: 21 December 2015</p>
N1  - <p>Export Date: 21 December 2015</p>
KW  - Agricultural drainage
KW  - agricultural land
KW  - Agricultural runoff
KW  - Agricultural watersheds
KW  - Agriculture
KW  - Anoxic sediments
KW  - California
KW  - constructed wetland
KW  - Design criterion
KW  - Diffuse pollution
KW  - drainage water
KW  - Ecosystem service
KW  - Ecosystem services
KW  - Field data
KW  - Field studies
KW  - First-order rate constants
KW  - Irrigated agriculture
KW  - Irrigated cropland
KW  - Kinetics
KW  - Laboratory microcosm
KW  - Loading rate
KW  - Mass removal
KW  - Michaelis-Menten
KW  - microcosm
KW  - Microcosm studies
KW  - nitrate
KW  - Nitrate concentration
KW  - Nitrate removal
KW  - Nitrates
KW  - pollutant removal
KW  - Rate constants
KW  - Removal rate
KW  - San Joaquin Valley
KW  - Saturation kinetics
KW  - Sedimentology
KW  - United States
KW  - watershed
KW  - Watersheds
KW  - Water treatment
KW  - Wetlands
KW  - Wetland treatment system
ER  - 

TY  - JOUR
TI  - Crop rotations including ley and manure can promote ecosystem services in conventional farming systems
AU  - Albizua, A.
AU  - Williams, A.
AU  - Hedlund, K.
AU  - Pascual, U.
T2  - Applied Soil Ecology
DA  - 2015///
PY  - 2015
DO  - 10.1016/j.apsoil.2015.06.003
VL  - 95
SP  - 54
EP  - 61
UR  - http://www.scopus.com/inward/record.url?eid=2-s2.0-84936094444&partnerID=40&md5=a696f595dd0a10e174dde0c770114950
DB  - Scopus
N1  - <p>CODEN: ASECF</p>
N1  - <p>CODEN: ASECF</p>
N1  - <p>Correspondence Address: Albizua, A.; Basque Center for Climate Change (BC3), Alameda Urquijo, 4, 4-1a, Spain</p>
N1  - <p>Correspondence Address: Albizua, A.; Basque Center for Climate Change (BC3), Alameda Urquijo, 4, 4-1a, Spain</p>
N1  - <p>Export Date: 2 December 2015</p>
N1  - <p>Export Date: 2 December 2015</p>
N1  - <p>Export Date: 2 December 2015</p>
N1  - <p>Export Date: 2 December 2015</p>
N1  - <p>Export Date: 2 December 2015</p>
N1  - <p>Export Date: 2 December 2015</p>
N1  - <p>Export Date: 2 December 2015</p>
N1  - <p>Export Date: 3 December 2015</p>
N1  - <p>Export Date: 21 December 2015</p>
N1  - <p>Export Date: 21 December 2015</p>
N1  - References: Alvarez, R., A review of nitrogen fertilizer and conservation tillage effects on soil organic carbon storage (2005) Soil Use Manag., 21, pp. 38-52; 
Bender, S.F., van der Heijden, M.G.A., Soil biota enhance agricultural sustainability by improving crop yield, nutrient uptake and reducing nitrogen leaching losses (2015) J. Appl. Ecol., 52, pp. 228-239;
Bennett, E.M., Peterson, G.D., Gordon, L.J., Understanding relationships among multiple ecosystem services (2009) Ecol. Lett., 12, pp. 1394-1404;
Birkhofer, K., Bezemer, T.M., Bloem, J., Bonkowski, M., Christensen, S., Dubois, D., Ekelund, F., Scheu, S., Long-term organic farming fosters below and aboveground biota: implications for soil quality, biological control and productivity (2008) Soil Biol. Biochem., 40, pp. 2297-2308;
Björklund, J., Limburg, K.E., Rydberg, T., Impact of production intensity on the ability of the agricultural landscape to generate ecosystem services: an example from Sweden (1999) Ecol. Econ., 29, pp. 269-291;
Bommarco, R., Kleijn, D., Potts, S.G., Ecological intensification: harnessing ecosystem services for food security (2013) Trends Ecol. Evol., 28, pp. 230-238;
Börjesson, G., Menichetti, L., Kirchmann, H., Kätterer, T., Soil microbial community structure affected by 53 years of nitrogen fertilisation and different organic amendments (2012) Biol. Fertil. Soils, 48, pp. 245-257;
Bronick, C.J., Lal, R., Soil structure and management: a review (2005) Geoderma, 124, pp. 3-22;
Brown, L., Scholefield, D., Jewkes, E.C., Lockyer, D.R., Del Prado, A., NGAUGE: a decision support system to optimise N fertilisation of British grassland for economic and environmental goals (2005) Agric. Ecosyst. Environ., 109, pp. 20-39;
Carlgren, K., Mattsson, L., Swedish soil fertility experiments (2001) Acta Agric. Scand. Sect. B, 51, pp. 49-76;
Cong, R.-G., Hedlund, K., Andersson, H., Brady, M., Managing soil natural capital: an effective strategy for mitigating future agricultural risks (2014) Agric. Syst., 129, pp. 30-39;
Dale, V.H., Polasky, S., Measures of the effects of agricultural practices on ecosystem services (2007) Ecol. Econ., 64, pp. 286-296;
De Groot, R.S., Alkemade, R., Braat, L., Hein, L., Willemen, L., Challenges in integrating the concept of ecosystem services and values in landscape planning, management and decision making (2010) Ecol. Complex, 7, pp. 260-272;
De Vries, F.T., Thébault, E., Liiri, M., Birkhofer, K., Tsiafouli, M.A., Bjørnlund, L., Jørgensen, H.B., de Ruiter, P.C., Soil food web properties explain ecosystem services across European land use systems (2013) Proc. Natl. Acad. Sci., 110, pp. 14296-14301. , others;
De Vries, F.T., Van Groenigen, J.W., Hoffland, E., Bloem, J., Nitrogen losses from two grassland soils with different fungal biomass (2011) Soil Biol. Biochem., 43, pp. 997-1005;
Farley, K.A., Kelly, E.F., Hofstede, R.G.M., Soil organic carbon and water retention after conversion of grasslands to pine plantations in the Ecuadorian Andes (2004) Ecosystems, 7, pp. 729-739;
Frostegård, Å., Bååth, E., The use of phospholipid fatty acid analysis to estimate bacterial and fungal biomass in soil (1996) Biol. Fertil. Soils, 22, pp. 59-65;
Gattinger, A., Muller, A., Haeni, M., Skinner, C., Fliessbach, A., Buchmann, N., Mäder, P., Niggli, U., Enhanced top soil carbon stocks under organic farming (2012) Proc. Natl. Acad. Sci., 109, pp. 18226-18231;
Gianinazzi, S., Gollotte, A., Binet, M.-N., van Tuinen, D., Redecker, D., Wipf, D., Agroecology: the key role of arbuscular mycorrhizas in ecosystem services (2010) Mycorrhiza, 20, pp. 519-530;
Godfray, H.C.J., Garnett, T., Food security and sustainable intensification (2014) Philos. Trans. R. Soc. B Biol. Sci., 369, p. 20120273;
Johnson, N.C., Resource stoichiometry elucidates the structure and function of arbuscular mycorrhizas across scales (2010) New Phytol., 185, pp. 631-647;
Kabir, Z., O'halloran Fyles, I.P.J.W., Hamel, C., Seasonal changes of arbuscular mycorrhizal fungi as affected by tillage practices and fertilization: hyphal density and mycorrhizal root colonization (1997) Plant and Soil, 192, pp. 285-293;
Kätterer, T., Bolinder, M.A., Andrén, O., Kirchmann, H., Menichetti, L., Roots contribute more to refractory soil organic matter than above-ground crop residues, as revealed by a long-term field experiment (2011) Agric. Ecosyst. Environ., 141, pp. 184-192;
Kirchmann, H., Eriksson, J., Properties and classification of soils of the Swedish long-term fertility experiments: II. Sites at Örja and Orup (1993) Acta Agric. Scand. Sect. B, 43, pp. 193-205;
Kirchmann, H., Eriksson, J., Snäll, S., Properties and classification of soils of the Swedish long-term fertility experiments: IV. Sites at Ekebo and Fjärdingslöv (1999) Acta Agric. Scand. Sect. B, 49, pp. 25-38;
Mäder, P., Fliessbach, A., Dubois, D., Gunst, L., Fried, P., Niggli, U., Soil fertility and biodiversity in organic farming (2002) Science, 296, pp. 1694-1697;
Matson, P.A., Parton, W.J., Power, A.G., Swift, M.J., Agricultural intensification and ecosystem properties (1997) Science, 277, pp. 504-509;
McDaniel, M.D., Tiemann, L.K., Grandy, A.S., Does agricultural crop diversity enhance soil microbial biomass and organic matter dynamics? A meta-analysis (2014) Ecol. Appl., 24, pp. 560-570;
(2005) Ecosystems and Human Well-being: Synthesis, , http://www.millenniumassessment.org, Island Press, Washington, D.C. (accessed online at );
Montanarella, L., Trends in land degradation in europe (2007) Climate and Land Degradation, Environmental Science and Engineering, pp. 83-104. , Springer, Berlin Heidelberg, M.V.K. Sivakumar, N. Ndiang'ui (Eds.);
Olsson, P.A., Bååth, E., Jakobsen, I., Söderström, B., The use of phospholipid and neutral lipid fatty acids to estimate biomass of arbuscular mycorrhizal fungi in soil (1995) Mycol. Res., 99, pp. 623-629;
Otabbong, D.E., Börling, K., Kätterer, T., Mattsson, L., Compatibility of the ammonium lactate (AL) and sodium bicarbonate (Olsen) methods for determining available phosphorus in Swedish soils (2009) Acta Agric. Scand. Sect. B, 59, pp. 373-378;
Paerl, H.W., Controlling eutrophication along the freshwater-marine continuum: dual nutrient (N and P) reductions are essential (2009) Estuaries Coasts, 32, pp. 593-601;
Plenchette, C., Clermont-Dauphin, C., Meynard, J.M., Fortin, J.A., Managing arbuscular mycorrhizal fungi in cropping systems (2005) Can. J. Plant Sci., 85, pp. 31-40;
Power, A.G., Ecosystem services and agriculture: tradeoffs and synergies (2010) Philos. Trans. R. Soc. B Biol. Sci., 365, pp. 2959-2971;
Raudsepp-Hearne, C., Peterson, G., Bennett, E., Ecosystem service bundles for analyzing tradeoffs in diverse landscapes (2010) Proc. Natl. Acad. Sci., 107, pp. 5242-5247;
Rillig, M.C., Mummey, D.L., Mycorrhizas and soil structure (2006) New Phytol., 171, pp. 41-53;
Smith, V.H., Tilman, G.D., Nekola, J.C., Eutrophication: impacts of excess nutrient inputs on freshwater, marine, and terrestrial ecosystems (1999) Environ. Pollut., 100, pp. 179-196;
Tchabi, A., Coyne, D., Hountondji, F., Lawouin, L., Wiemken, A., Oehl, F., Arbuscular mycorrhizal fungal communities in sub-Saharan Savannas of Benin, West Africa, as affected by agricultural land use intensity and ecological zone (2008) Mycorrhiza, 18, pp. 181-195;
Treseder, K.K., A meta-analysis of mycorrhizal responses to nitrogen, phosphorus, and atmospheric CO<inf>2</inf> in field studies (2004) New Phytol., 164, pp. 347-355;
Tsiafouli, M.A., Thébault, E., Sgardelis, S.P., de Ruiter, P.C., van der Putten, W.H., Birkhofer, K., Hemerik, L., Hedlund, K., Intensive agriculture reduces soil biodiversity across Europe (2015) Glob. Change Biol., 21, pp. 973-985;
van Eekeren, N., Bommelé, L., Bloem, J., Schouten, T., Rutgers, M., de Goede, R., Reheul, D., Brussaard, L., Soil biological quality after 36 years of ley-arable cropping, permanent grassland and permanent arable cropping (2008) Appl. Soil Ecol., 40, pp. 432-446;
Verbruggen, E., Kiers, E.T., Bakelaar, P.N., Röling, W.F., van der Heijden, M.G.A., Provision of contrasting ecosystem services by soil communities from different agricultural fields (2012) Plant Soil, 350, pp. 43-55;
Williams, A., Börjesson, G., Hedlund, K., The effects of 55 years of different inorganic fertiliser regimes on soil properties and microbial community composition (2013) Soil Biol. Biochem., 67, pp. 41-46;
Williams, A., Hedlund, K., Indicators and trade-offs of ecosystem services in agricultural soils along a landscape heterogeneity gradient (2014) Appl. Soil Ecol., 77, pp. 1-8;
Williams, A., Hedlund, K., Indicators of soil ecosystem services in conventional and organic arable fields along a gradient of landscape heterogeneity in southern Sweden (2013) Appl. Soil Ecol., 65, pp. 1-7;
Yagiz, S., Gokceoglu, C., Application of fuzzy inference system and nonlinear regression models for predicting rock brittleness (2010) Expert Syst. Appl., 37, pp. 2265-2272;
Zelles, L., Fatty acid patterns of phospholipids and lipopolysaccharides in the characterisation of microbial communities in soil: a review (1999) Biol. Fertil. Soils, 29, pp. 111-129;
Zhao, C., Liu, L., Wang, J., Huang, W., Song, X., Li, C., Predicting grain protein content of winter wheat using remote sensing data based on nitrogen status and water stress (2005) Int. J. Appl. Earth Obs. Geoinf., 7, pp. 1-9
N1  - References: Alvarez, R., A review of nitrogen fertilizer and conservation tillage effects on soil organic carbon storage (2005) Soil Use Manag., 21, pp. 38-52; 
Bender, S.F., van der Heijden, M.G.A., Soil biota enhance agricultural sustainability by improving crop yield, nutrient uptake and reducing nitrogen leaching losses (2015) J. Appl. Ecol., 52, pp. 228-239;
Bennett, E.M., Peterson, G.D., Gordon, L.J., Understanding relationships among multiple ecosystem services (2009) Ecol. Lett., 12, pp. 1394-1404;
Birkhofer, K., Bezemer, T.M., Bloem, J., Bonkowski, M., Christensen, S., Dubois, D., Ekelund, F., Scheu, S., Long-term organic farming fosters below and aboveground biota: implications for soil quality, biological control and productivity (2008) Soil Biol. Biochem., 40, pp. 2297-2308;
Björklund, J., Limburg, K.E., Rydberg, T., Impact of production intensity on the ability of the agricultural landscape to generate ecosystem services: an example from Sweden (1999) Ecol. Econ., 29, pp. 269-291;
Bommarco, R., Kleijn, D., Potts, S.G., Ecological intensification: harnessing ecosystem services for food security (2013) Trends Ecol. Evol., 28, pp. 230-238;
Börjesson, G., Menichetti, L., Kirchmann, H., Kätterer, T., Soil microbial community structure affected by 53 years of nitrogen fertilisation and different organic amendments (2012) Biol. Fertil. Soils, 48, pp. 245-257;
Bronick, C.J., Lal, R., Soil structure and management: a review (2005) Geoderma, 124, pp. 3-22;
Brown, L., Scholefield, D., Jewkes, E.C., Lockyer, D.R., Del Prado, A., NGAUGE: a decision support system to optimise N fertilisation of British grassland for economic and environmental goals (2005) Agric. Ecosyst. Environ., 109, pp. 20-39;
Carlgren, K., Mattsson, L., Swedish soil fertility experiments (2001) Acta Agric. Scand. Sect. B, 51, pp. 49-76;
Cong, R.-G., Hedlund, K., Andersson, H., Brady, M., Managing soil natural capital: an effective strategy for mitigating future agricultural risks (2014) Agric. Syst., 129, pp. 30-39;
Dale, V.H., Polasky, S., Measures of the effects of agricultural practices on ecosystem services (2007) Ecol. Econ., 64, pp. 286-296;
De Groot, R.S., Alkemade, R., Braat, L., Hein, L., Willemen, L., Challenges in integrating the concept of ecosystem services and values in landscape planning, management and decision making (2010) Ecol. Complex, 7, pp. 260-272;
De Vries, F.T., Thébault, E., Liiri, M., Birkhofer, K., Tsiafouli, M.A., Bjørnlund, L., Jørgensen, H.B., de Ruiter, P.C., Soil food web properties explain ecosystem services across European land use systems (2013) Proc. Natl. Acad. Sci., 110, pp. 14296-14301. , others;
De Vries, F.T., Van Groenigen, J.W., Hoffland, E., Bloem, J., Nitrogen losses from two grassland soils with different fungal biomass (2011) Soil Biol. Biochem., 43, pp. 997-1005;
Farley, K.A., Kelly, E.F., Hofstede, R.G.M., Soil organic carbon and water retention after conversion of grasslands to pine plantations in the Ecuadorian Andes (2004) Ecosystems, 7, pp. 729-739;
Frostegård, Å., Bååth, E., The use of phospholipid fatty acid analysis to estimate bacterial and fungal biomass in soil (1996) Biol. Fertil. Soils, 22, pp. 59-65;
Gattinger, A., Muller, A., Haeni, M., Skinner, C., Fliessbach, A., Buchmann, N., Mäder, P., Niggli, U., Enhanced top soil carbon stocks under organic farming (2012) Proc. Natl. Acad. Sci., 109, pp. 18226-18231;
Gianinazzi, S., Gollotte, A., Binet, M.-N., van Tuinen, D., Redecker, D., Wipf, D., Agroecology: the key role of arbuscular mycorrhizas in ecosystem services (2010) Mycorrhiza, 20, pp. 519-530;
Godfray, H.C.J., Garnett, T., Food security and sustainable intensification (2014) Philos. Trans. R. Soc. B Biol. Sci., 369, p. 20120273;
Johnson, N.C., Resource stoichiometry elucidates the structure and function of arbuscular mycorrhizas across scales (2010) New Phytol., 185, pp. 631-647;
Kabir, Z., O'halloran Fyles, I.P.J.W., Hamel, C., Seasonal changes of arbuscular mycorrhizal fungi as affected by tillage practices and fertilization: hyphal density and mycorrhizal root colonization (1997) Plant and Soil, 192, pp. 285-293;
Kätterer, T., Bolinder, M.A., Andrén, O., Kirchmann, H., Menichetti, L., Roots contribute more to refractory soil organic matter than above-ground crop residues, as revealed by a long-term field experiment (2011) Agric. Ecosyst. Environ., 141, pp. 184-192;
Kirchmann, H., Eriksson, J., Properties and classification of soils of the Swedish long-term fertility experiments: II. Sites at Örja and Orup (1993) Acta Agric. Scand. Sect. B, 43, pp. 193-205;
Kirchmann, H., Eriksson, J., Snäll, S., Properties and classification of soils of the Swedish long-term fertility experiments: IV. Sites at Ekebo and Fjärdingslöv (1999) Acta Agric. Scand. Sect. B, 49, pp. 25-38;
Mäder, P., Fliessbach, A., Dubois, D., Gunst, L., Fried, P., Niggli, U., Soil fertility and biodiversity in organic farming (2002) Science, 296, pp. 1694-1697;
Matson, P.A., Parton, W.J., Power, A.G., Swift, M.J., Agricultural intensification and ecosystem properties (1997) Science, 277, pp. 504-509;
McDaniel, M.D., Tiemann, L.K., Grandy, A.S., Does agricultural crop diversity enhance soil microbial biomass and organic matter dynamics? A meta-analysis (2014) Ecol. Appl., 24, pp. 560-570;
(2005) Ecosystems and Human Well-being: Synthesis, , http://www.millenniumassessment.org, Island Press, Washington, D.C. (accessed online at );
Montanarella, L., Trends in land degradation in europe (2007) Climate and Land Degradation, Environmental Science and Engineering, pp. 83-104. , Springer, Berlin Heidelberg, M.V.K. Sivakumar, N. Ndiang'ui (Eds.);
Olsson, P.A., Bååth, E., Jakobsen, I., Söderström, B., The use of phospholipid and neutral lipid fatty acids to estimate biomass of arbuscular mycorrhizal fungi in soil (1995) Mycol. Res., 99, pp. 623-629;
Otabbong, D.E., Börling, K., Kätterer, T., Mattsson, L., Compatibility of the ammonium lactate (AL) and sodium bicarbonate (Olsen) methods for determining available phosphorus in Swedish soils (2009) Acta Agric. Scand. Sect. B, 59, pp. 373-378;
Paerl, H.W., Controlling eutrophication along the freshwater-marine continuum: dual nutrient (N and P) reductions are essential (2009) Estuaries Coasts, 32, pp. 593-601;
Plenchette, C., Clermont-Dauphin, C., Meynard, J.M., Fortin, J.A., Managing arbuscular mycorrhizal fungi in cropping systems (2005) Can. J. Plant Sci., 85, pp. 31-40;
Power, A.G., Ecosystem services and agriculture: tradeoffs and synergies (2010) Philos. Trans. R. Soc. B Biol. Sci., 365, pp. 2959-2971;
Raudsepp-Hearne, C., Peterson, G., Bennett, E., Ecosystem service bundles for analyzing tradeoffs in diverse landscapes (2010) Proc. Natl. Acad. Sci., 107, pp. 5242-5247;
Rillig, M.C., Mummey, D.L., Mycorrhizas and soil structure (2006) New Phytol., 171, pp. 41-53;
Smith, V.H., Tilman, G.D., Nekola, J.C., Eutrophication: impacts of excess nutrient inputs on freshwater, marine, and terrestrial ecosystems (1999) Environ. Pollut., 100, pp. 179-196;
Tchabi, A., Coyne, D., Hountondji, F., Lawouin, L., Wiemken, A., Oehl, F., Arbuscular mycorrhizal fungal communities in sub-Saharan Savannas of Benin, West Africa, as affected by agricultural land use intensity and ecological zone (2008) Mycorrhiza, 18, pp. 181-195;
Treseder, K.K., A meta-analysis of mycorrhizal responses to nitrogen, phosphorus, and atmospheric CO<inf>2</inf> in field studies (2004) New Phytol., 164, pp. 347-355;
Tsiafouli, M.A., Thébault, E., Sgardelis, S.P., de Ruiter, P.C., van der Putten, W.H., Birkhofer, K., Hemerik, L., Hedlund, K., Intensive agriculture reduces soil biodiversity across Europe (2015) Glob. Change Biol., 21, pp. 973-985;
van Eekeren, N., Bommelé, L., Bloem, J., Schouten, T., Rutgers, M., de Goede, R., Reheul, D., Brussaard, L., Soil biological quality after 36 years of ley-arable cropping, permanent grassland and permanent arable cropping (2008) Appl. Soil Ecol., 40, pp. 432-446;
Verbruggen, E., Kiers, E.T., Bakelaar, P.N., Röling, W.F., van der Heijden, M.G.A., Provision of contrasting ecosystem services by soil communities from different agricultural fields (2012) Plant Soil, 350, pp. 43-55;
Williams, A., Börjesson, G., Hedlund, K., The effects of 55 years of different inorganic fertiliser regimes on soil properties and microbial community composition (2013) Soil Biol. Biochem., 67, pp. 41-46;
Williams, A., Hedlund, K., Indicators and trade-offs of ecosystem services in agricultural soils along a landscape heterogeneity gradient (2014) Appl. Soil Ecol., 77, pp. 1-8;
Williams, A., Hedlund, K., Indicators of soil ecosystem services in conventional and organic arable fields along a gradient of landscape heterogeneity in southern Sweden (2013) Appl. Soil Ecol., 65, pp. 1-7;
Yagiz, S., Gokceoglu, C., Application of fuzzy inference system and nonlinear regression models for predicting rock brittleness (2010) Expert Syst. Appl., 37, pp. 2265-2272;
Zelles, L., Fatty acid patterns of phospholipids and lipopolysaccharides in the characterisation of microbial communities in soil: a review (1999) Biol. Fertil. Soils, 29, pp. 111-129;
Zhao, C., Liu, L., Wang, J., Huang, W., Song, X., Li, C., Predicting grain protein content of winter wheat using remote sensing data based on nitrogen status and water stress (2005) Int. J. Appl. Earth Obs. Geoinf., 7, pp. 1-9
KW  - Agricultural management
KW  - Bacteria (microorganisms)
KW  - Soil ecosystem services
KW  - Synergies
KW  - Trade-offs
KW  - Triticum aestivum
ER  - 

TY  - JOUR
TI  - Degradation rate of soil function varies with trajectory of agricultural intensification
AU  - Squire, G.R.
AU  - Hawes, C.
AU  - Valentine, T.A.
AU  - Young, M.W.
T2  - Agriculture, Ecosystems and Environment
DA  - 2015///
PY  - 2015
DO  - 10.1016/j.agee.2014.12.004
VL  - 202
SP  - 160
EP  - 167
UR  - http://www.scopus.com/inward/record.url?eid=2-s2.0-84921334037&partnerID=40&md5=ed3a7f5273509a7f636d6dfb8c648d36
DB  - Scopus
N1  - <p>CODEN: AEEND</p>
N1  - <p>CODEN: AEEND</p>
N1  - <p>Correspondence Address: Squire, G.R.; James Hutton InstituteUnited Kingdom</p>
N1  - <p>Correspondence Address: Squire, G.R.; James Hutton InstituteUnited Kingdom</p>
N1  - <p>Export Date: 2 December 2015</p>
N1  - <p>Export Date: 2 December 2015</p>
N1  - <p>Export Date: 2 December 2015</p>
N1  - <p>Export Date: 2 December 2015</p>
N1  - <p>Export Date: 2 December 2015</p>
N1  - <p>Export Date: 2 December 2015</p>
N1  - <p>Export Date: 3 December 2015</p>
N1  - <p>Export Date: 21 December 2015</p>
N1  - <p>Export Date: 21 December 2015</p>
N1  - <p>References: Bartlett, M.D., Briones, M.J.I., Neilson, R., Schmidt, O., Spurgeon, D., Creamer, R.E., A critical review of current methods in earthworm ecology: from individuals to populations (2010) Eur. J. Soil Biol., 46, pp. 67-73; <br/>Blouin, M., Hodson, M.E., Delgado, E.A., Baker, G., Brussaard, L., Butt, K.R., Dai, J., Brun, J.-J., A review of earth worm impact on soil function and ecosystem services (2013) Eur. J. Soil Sci., 64, pp. 161-182;<br/>Church, B.M., Lewis, D.A., Fertiliser use on farm crops, England and Wales: information from the survey of fertiliser practice, 1942-1976 (1977) Outlook Agr., 9, pp. 186-193;<br/>(2011) The State of Scotland's Soil, , http://www.sepa.org.uk/land/land_publications.aspx, Natural Scotland, K.E. Dobbie, P.M.C. Bruneau, W. Towers (Eds.);<br/>Donald, P.F., Green, R.W.E., Heath, M.F., Agricultural intensification and the collapse of Europe's farmland bird populations (2001) Proc. R. Soc. B, 268, pp. 25-29;<br/>(2013), (and previous annual reports in this series). Edinburgh: RESAS, Scottish GovernmentEmmett, B.A., Reynolds, B., Chamberlain, P.M., Rowe, E., Spurgeon, D., Brittain, S.A., Frogbrook, Z., Woods, C., Countryside Survey: Soils Report from 2007 (2010), Technical report No. 9/07. NERC/Centre for Ecology and HydrologyEvans, L.T., (1993) Crop Evolution, Adaptation and Yield, , Cambridge University Press, Cambridge;<br/>The British survey of fertiliser practice: fertiliser use on farm crops for crop year 2012 ( (2013), http://https://www.gov.uk/government/uploads/system/uploads/attachment_data/file/192605/fertiliseruse-report2012-25apr13.pdf, previous reports in this series). London: DefraFirbank, L., Bradbury, R.B., McCracken, D.I., Stoate, C., Delivering multiple ecosystem services from closed farmland in the UK (2013) Agr. Ecosyst. Environ., 166, pp. 65-75;<br/>Hawes, C., Squire, G.R., Hallett, P.D., Watson, C., Young, M., Arable plant communities as indicators of farming practice (2010) Agr. Ecosyst. Environ., 138, pp. 17-26;<br/>Lal, R., Degradation and resilience of soils (1997) Phil. Trans. R. Soc. Lond. B, 352, pp. 997-1010;<br/>Marshall, E.J.P., Brown, V.K., Boatman, N.D., Lutman, P.J.W., Squire, G.R., Ward, L.K., The role of weeds in supporting biological diversity within cropped fields (2003) Weed Res., 43, pp. 77-89;<br/>Powlson, D.S., Gregory, P.J., Whalley, W.R., Quinton, J.N., Hopkins, D.W., Whitmore, P.R., Hirsch, P.R., Goulding, K.W.T., Soil management in relation to sustainable agriculture and ecosystem services (2011) Food Policy, 36, pp. 572-587;<br/>(2009) Reaping the Benefits: Science and the Sustainable Intensification of Global Agriculture, , Royal Society, London;<br/>Smith, P., Ashmore, M.R., Black, H.J., Burgess, P.J., Evans, C.D., Quine, T.A., Thomson, A.M., Orr, H.G., The role of ecosystems and their management in regulating climate, and soil, water and air quality (2013) J. Appl. Ecol., 50, pp. 812-829;<br/>Stoate, C., Boatman, N.D., Borralho, R.J., Carvalho, C.R., de Snoo, G.R., Eden, P., Ecological impacts of arable intensification in Europe (2001) J. Environ. Manage., 63, pp. 337-365;<br/>Struthers, G., (2007) Pesticide Usage in Scotland: Arable Crops 2006 (Revised 2009) and Previous Documents in this Series, , Scottish Agricultural Science Agency, Edinburgh;<br/>Tracy, S.R., Black, C.R., Roberts, J.A., Mooney, S.J., Soil compaction: a review of past and present techniques for investigating effects on root growth (2011) J. Sci. Food Agric., 91, pp. 1528-1537;<br/>Valentine, T.A., Hallett, P.D., Binnie, K., Young, M.W., Squire, G.R., Hawes, C., Bengough, A.G., Soil strength and macropore volume limit root elongation rates in many UK agricultural soils (2012) Ann. Bot., 110, pp. 259-270;<br/>Whitmore, A.P., Whalley, W., Physical effects of soil drying on roots and crop growth (2009) J. Exp. Bot., 60, pp. 2845-2857</p>
N1  - <p>References: Bartlett, M.D., Briones, M.J.I., Neilson, R., Schmidt, O., Spurgeon, D., Creamer, R.E., A critical review of current methods in earthworm ecology: from individuals to populations (2010) Eur. J. Soil Biol., 46, pp. 67-73; <br/>Blouin, M., Hodson, M.E., Delgado, E.A., Baker, G., Brussaard, L., Butt, K.R., Dai, J., Brun, J.-J., A review of earth worm impact on soil function and ecosystem services (2013) Eur. J. Soil Sci., 64, pp. 161-182;<br/>Church, B.M., Lewis, D.A., Fertiliser use on farm crops, England and Wales: information from the survey of fertiliser practice, 1942-1976 (1977) Outlook Agr., 9, pp. 186-193;<br/>(2011) The State of Scotland's Soil, , http://www.sepa.org.uk/land/land_publications.aspx, Natural Scotland, K.E. Dobbie, P.M.C. Bruneau, W. Towers (Eds.);<br/>Donald, P.F., Green, R.W.E., Heath, M.F., Agricultural intensification and the collapse of Europe's farmland bird populations (2001) Proc. R. Soc. B, 268, pp. 25-29;<br/>(2013), (and previous annual reports in this series). Edinburgh: RESAS, Scottish GovernmentEmmett, B.A., Reynolds, B., Chamberlain, P.M., Rowe, E., Spurgeon, D., Brittain, S.A., Frogbrook, Z., Woods, C., Countryside Survey: Soils Report from 2007 (2010), Technical report No. 9/07. NERC/Centre for Ecology and HydrologyEvans, L.T., (1993) Crop Evolution, Adaptation and Yield, , Cambridge University Press, Cambridge;<br/>The British survey of fertiliser practice: fertiliser use on farm crops for crop year 2012 ( (2013), http://https://www.gov.uk/government/uploads/system/uploads/attachment_data/file/192605/fertiliseruse-report2012-25apr13.pdf, previous reports in this series). London: DefraFirbank, L., Bradbury, R.B., McCracken, D.I., Stoate, C., Delivering multiple ecosystem services from closed farmland in the UK (2013) Agr. Ecosyst. Environ., 166, pp. 65-75;<br/>Hawes, C., Squire, G.R., Hallett, P.D., Watson, C., Young, M., Arable plant communities as indicators of farming practice (2010) Agr. Ecosyst. Environ., 138, pp. 17-26;<br/>Lal, R., Degradation and resilience of soils (1997) Phil. Trans. R. Soc. Lond. B, 352, pp. 997-1010;<br/>Marshall, E.J.P., Brown, V.K., Boatman, N.D., Lutman, P.J.W., Squire, G.R., Ward, L.K., The role of weeds in supporting biological diversity within cropped fields (2003) Weed Res., 43, pp. 77-89;<br/>Powlson, D.S., Gregory, P.J., Whalley, W.R., Quinton, J.N., Hopkins, D.W., Whitmore, P.R., Hirsch, P.R., Goulding, K.W.T., Soil management in relation to sustainable agriculture and ecosystem services (2011) Food Policy, 36, pp. 572-587;<br/>(2009) Reaping the Benefits: Science and the Sustainable Intensification of Global Agriculture, , Royal Society, London;<br/>Smith, P., Ashmore, M.R., Black, H.J., Burgess, P.J., Evans, C.D., Quine, T.A., Thomson, A.M., Orr, H.G., The role of ecosystems and their management in regulating climate, and soil, water and air quality (2013) J. Appl. Ecol., 50, pp. 812-829;<br/>Stoate, C., Boatman, N.D., Borralho, R.J., Carvalho, C.R., de Snoo, G.R., Eden, P., Ecological impacts of arable intensification in Europe (2001) J. Environ. Manage., 63, pp. 337-365;<br/>Struthers, G., (2007) Pesticide Usage in Scotland: Arable Crops 2006 (Revised 2009) and Previous Documents in this Series, , Scottish Agricultural Science Agency, Edinburgh;<br/>Tracy, S.R., Black, C.R., Roberts, J.A., Mooney, S.J., Soil compaction: a review of past and present techniques for investigating effects on root growth (2011) J. Sci. Food Agric., 91, pp. 1528-1537;<br/>Valentine, T.A., Hallett, P.D., Binnie, K., Young, M.W., Squire, G.R., Hawes, C., Bengough, A.G., Soil strength and macropore volume limit root elongation rates in many UK agricultural soils (2012) Ann. Bot., 110, pp. 259-270;<br/>Whitmore, A.P., Whalley, W., Physical effects of soil drying on roots and crop growth (2009) J. Exp. Bot., 60, pp. 2845-2857</p>
KW  - agricultural intensification
KW  - Agricultural management
KW  - biodegradation
KW  - crop yield
KW  - economic analysis
KW  - Ecosystem service
KW  - Ecosystem services
KW  - fertilizer application
KW  - food production
KW  - Intensification metrics
KW  - porosity
KW  - potato
KW  - Soil carbon
KW  - Soil degradation
KW  - Solanum tuberosum
KW  - Triticum aestivum
KW  - United Kingdom
ER  - 

TY  - JOUR
TI  - The application of an ecosystem services framework to estimate the economic value of dung beetles to the U.K. cattle industry
AU  - Beynon, S.A.
AU  - Wainwright, W.A.
AU  - Christie, M.
T2  - Ecological Entomology
DA  - 2015///
PY  - 2015
DO  - 10.1111/een.12240
VL  - 40
IS  - S1
SP  - 124
EP  - 135
UR  - http://www.scopus.com/inward/record.url?eid=2-s2.0-84939772430&partnerID=40&md5=1ea0ef083335a2345d946a73a4b52641
DB  - Scopus
N1  - <p>Cited By :3</p>
N1  - <p>Cited By :3</p>
N1  - <p>Cited By :3</p>
N1  - <p>Cited By :3</p>
N1  - <p>Cited By :3</p>
N1  - <p>Cited By :3</p>
N1  - <p>Cited By :3</p>
N1  - <p>Cited By :3</p>
N1  - <p>Export Date: 2 December 2015</p>
N1  - <p>Export Date: 2 December 2015</p>
N1  - <p>Export Date: 2 December 2015</p>
N1  - <p>Export Date: 2 December 2015</p>
N1  - <p>Export Date: 2 December 2015</p>
N1  - <p>Export Date: 3 December 2015</p>
N1  - <p>Export Date: 21 December 2015</p>
N1  - <p>Export Date: 21 December 2015</p>
KW  - Agriculture
KW  - Anthelmintics
KW  - biodiversity
KW  - Bos
KW  - Cattle
KW  - Coleoptera
KW  - Decomposition
KW  - DEFRA ecosystem services framework
KW  - Dung beetles
KW  - Economic valuation
KW  - Ecosystem functioning
KW  - Ecosystem services
KW  - Geotrupidae
KW  - Invertebrata
KW  - livestock
KW  - Scarabaeidae
KW  - soil
ER  - 

TY  - JOUR
TI  - Improving intercropping: A synthesis of research in agronomy, plant physiology and ecology
AU  - Brooker, R.W.
AU  - Bennett, A.E.
AU  - Cong, W.-F.
AU  - Daniell, T.J.
AU  - George, T.S.
AU  - Hallett, P.D.
AU  - Hawes, C.
AU  - Iannetta, P.P.M.
AU  - Jones, H.G.
AU  - Karley, A.J.
AU  - Li, L.
AU  - Mckenzie, B.M.
AU  - Pakeman, R.J.
AU  - Paterson, E.
AU  - Schöb, C.
AU  - Shen, J.
AU  - Squire, G.
AU  - Watson, C.A.
AU  - Zhang, C.
AU  - Zhang, F.
AU  - Zhang, J.
AU  - White, P.J.
T2  - New Phytologist
DA  - 2015///
PY  - 2015
DO  - 10.1111/nph.13132
VL  - 206
IS  - 1
SP  - 107
EP  - 117
UR  - http://www.scopus.com/inward/record.url?eid=2-s2.0-84923270402&partnerID=40&md5=9e88525c7b6a0ed4ad997ab4162fd34a
DB  - Scopus
N1  - <p>Cited By :3</p>
N1  - <p>Cited By :3</p>
N1  - <p>Cited By :3</p>
N1  - <p>Cited By :3</p>
N1  - <p>Cited By :3</p>
N1  - <p>Cited By :3</p>
N1  - <p>Cited By :3</p>
N1  - <p>Cited By :3</p>
N1  - <p>Export Date: 2 December 2015</p>
N1  - <p>Export Date: 2 December 2015</p>
N1  - <p>Export Date: 2 December 2015</p>
N1  - <p>Export Date: 2 December 2015</p>
N1  - <p>Export Date: 2 December 2015</p>
N1  - <p>Export Date: 3 December 2015</p>
N1  - <p>Export Date: 21 December 2015</p>
N1  - <p>Export Date: 21 December 2015</p>
KW  - Agriculture
KW  - agronomy
KW  - biodiversity
KW  - coexistence
KW  - Ecosystem service
KW  - Ecosystem services
KW  - genotype
KW  - intensive agriculture
KW  - Intercropping
KW  - interdisciplinary approach
KW  - microtopography
KW  - Organismal interactions
KW  - Pest control
KW  - physiological response
KW  - resource availability
KW  - Resource use
KW  - Soil biodiversity
KW  - Sustainable intensification
ER  - 

TY  - JOUR
TI  - Intensive agriculture reduces soil biodiversity across Europe
AU  - Tsiafouli, M.A.
AU  - Thébault, E.
AU  - Sgardelis, S.P.
AU  - de Ruiter, P.C.
AU  - van der Putten, W.H.
AU  - Birkhofer, K.
AU  - Hemerik, L.
AU  - de Vries, F.T.
AU  - Bardgett, R.D.
AU  - Brady, M.V.
AU  - Bjornlund, L.
AU  - Jørgensen, H.B.
AU  - Christensen, S.
AU  - Hertefeldt, T.D.
AU  - Hotes, S.
AU  - Gera Hol, W.H.
AU  - Frouz, J.
AU  - Liiri, M.
AU  - Mortimer, S.R.
AU  - Setälä, H.
AU  - Tzanopoulos, J.
AU  - Uteseny, K.
AU  - Pižl, V.
AU  - Stary, J.
AU  - Wolters, V.
AU  - Hedlund, K.
T2  - Global Change Biology
DA  - 2015///
PY  - 2015
DO  - 10.1111/gcb.12752
VL  - 21
IS  - 2
SP  - 973
EP  - 985
UR  - http://www.scopus.com/inward/record.url?eid=2-s2.0-84923217568&partnerID=40&md5=dddd3574107cd2c2ee3e4fefb67727fa
DB  - Scopus
N1  - <p>Cited By :8</p>
N1  - <p>Cited By :8</p>
N1  - <p>Cited By :8</p>
N1  - <p>Cited By :8</p>
N1  - <p>Cited By :8</p>
N1  - <p>Cited By :14</p>
N1  - <p>Cited By :14</p>
N1  - <p>Export Date: 2 December 2015</p>
N1  - <p>Export Date: 2 December 2015</p>
N1  - <p>Export Date: 2 December 2015</p>
N1  - <p>Export Date: 2 December 2015</p>
N1  - <p>Export Date: 3 December 2015</p>
N1  - <p>Export Date: 21 December 2015</p>
N1  - <p>Export Date: 21 December 2015</p>
KW  - Acari
KW  - agricultural intensification
KW  - biodiversity
KW  - Body mass
KW  - Czech Republic
KW  - Ecosystem service
KW  - Ecosystem services
KW  - food web
KW  - functional group
KW  - Functional groups
KW  - Greece
KW  - intensive agriculture
KW  - Oribatida
KW  - soil biota
KW  - Soil food web
KW  - Sweden
KW  - Taxonomic breadth
KW  - Taxonomic distinctness
KW  - taxonomy
KW  - terrestrial ecosystem
KW  - Terrestrial ecosystems
KW  - United Kingdom
ER  - 

TY  - JOUR
TI  - Organic farming fosters agroecosystem functioning in Argentinian temperate soils: Evidence from litter decomposition and soil fauna
AU  - Domínguez, A.
AU  - Bedano, J.C.
AU  - Becker, A.R.
AU  - Arolfo, R.V.
T2  - Applied Soil Ecology
DA  - 2014///
PY  - 2014
DO  - 10.1016/j.apsoil.2013.11.008
VL  - 83
SP  - 170
EP  - 176
UR  - http://www.scopus.com/inward/record.url?eid=2-s2.0-84910089617&partnerID=40&md5=b6631a0ea23cdf1666d4bd6692f2f47d
DB  - Scopus
N1  - <p>Cited By :1</p>
N1  - <p>Cited By :1</p>
N1  - <p>Cited By :1</p>
N1  - <p>Cited By :1</p>
N1  - <p>Cited By :1</p>
N1  - <p>Cited By :1</p>
N1  - <p>Cited By :1</p>
N1  - <p>Export Date: 2 December 2015</p>
N1  - <p>Export Date: 2 December 2015</p>
N1  - <p>Export Date: 2 December 2015</p>
N1  - <p>Export Date: 2 December 2015</p>
N1  - <p>Export Date: 3 December 2015</p>
N1  - <p>Export Date: 21 December 2015</p>
N1  - <p>Export Date: 21 December 2015</p>
KW  - Conventional agriculture
KW  - Ecosystem services
KW  - Litter decomposition
KW  - Organic agriculture
KW  - Soil macrofauna
KW  - Soil mesofauna
ER  - 

TY  - JOUR
TI  - Ecosystem services in agricultural landscapes: A spatially explicit approach to support sustainable soil management
AU  - Forouzangohar, M.
AU  - Crossman, N.D.
AU  - Macewan, R.J.
AU  - Wallace, D.D.
AU  - Bennett, L.T.
T2  - The Scientific World Journal
DA  - 2014///
PY  - 2014
DO  - 10.1155/2014/483298
VL  - 2014
UR  - http://www.scopus.com/inward/record.url?eid=2-s2.0-84896827548&partnerID=40&md5=5d56c52b570501469b0a6520f8f7f4cc
DB  - Scopus
N1  - <p>Cited By :2</p>
N1  - <p>Cited By :2</p>
N1  - <p>Cited By :2</p>
N1  - <p>Cited By :2</p>
N1  - <p>Cited By :2</p>
N1  - <p>Cited By :2</p>
N1  - <p>Cited By :2</p>
N1  - <p>Export Date: 2 December 2015</p>
N1  - <p>Export Date: 2 December 2015</p>
N1  - <p>Export Date: 2 December 2015</p>
N1  - <p>Export Date: 2 December 2015</p>
N1  - <p>Export Date: 3 December 2015</p>
N1  - <p>Export Date: 21 December 2015</p>
N1  - <p>Export Date: 21 December 2015</p>
KW  - Agriculture
KW  - Article
KW  - Australia
KW  - biodiversity
KW  - carbon sequestration
KW  - Conservation of Natural Resources
KW  - crop
KW  - ecosystem
KW  - environmental protection
KW  - geostatistical analysis
KW  - infrared spectroscopy
KW  - irrigation (agriculture)
KW  - landscape
KW  - land use
KW  - organic carbon
KW  - physical model
KW  - soil
KW  - soil analysis
KW  - Soil degradation
KW  - soil management
KW  - soil property
KW  - soil water
KW  - sustainable agriculture
KW  - Water supply
ER  - 

TY  - JOUR
TI  - Does extensification lead to enhanced provision of ecosystems services from soils in UK agriculture?
AU  - Horrocks, C.A.
AU  - Dungait, J.A.J.
AU  - Cardenas, L.M.
AU  - Heal, K.V.
T2  - Land Use Policy
DA  - 2014///
PY  - 2014
DO  - 10.1016/j.landusepol.2013.10.023
VL  - 38
SP  - 123
EP  - 128
UR  - http://www.scopus.com/inward/record.url?eid=2-s2.0-84888401816&partnerID=40&md5=18a4c200bf103ebdf7aaf354e201c6b1
DB  - Scopus
N1  - <p>Cited By :5</p>
N1  - <p>Cited By :5</p>
N1  - <p>Cited By :5</p>
N1  - <p>Cited By :5</p>
N1  - <p>Cited By :5</p>
N1  - <p>Cited By :5</p>
N1  - <p>Cited By :5</p>
N1  - <p>Export Date: 2 December 2015</p>
N1  - <p>Export Date: 2 December 2015</p>
N1  - <p>Export Date: 2 December 2015</p>
N1  - <p>Export Date: 2 December 2015</p>
N1  - <p>Export Date: 3 December 2015</p>
N1  - <p>Export Date: 21 December 2015</p>
N1  - <p>Export Date: 21 December 2015</p>
KW  - Agricultural management
KW  - agricultural soil
KW  - Agri-environment scheme
KW  - alternative agriculture
KW  - carbon dioxide
KW  - carbon emission
KW  - Ecosystem service
KW  - Ecosystem services
KW  - greenhouse gas
KW  - intensive agriculture
KW  - nutrient cycling
KW  - service provision
KW  - soil
KW  - sustainable agriculture
KW  - United Kingdom
ER  - 

TY  - JOUR
TI  - Managing soil natural capital: An effective strategy for mitigating future agricultural risks?
AU  - Cong, R.-G.
AU  - Hedlund, K.
AU  - Andersson, H.
AU  - Brady, M.
T2  - Agricultural Systems
DA  - 2014///
PY  - 2014
DO  - 10.1016/j.agsy.2014.05.003
VL  - 129
SP  - 30
EP  - 39
UR  - http://www.scopus.com/inward/record.url?eid=2-s2.0-84903906422&partnerID=40&md5=63a55208a8f2f57afd03758da2cc8fa5
DB  - Scopus
N1  - <p>Cited By :5</p>
N1  - <p>Cited By :5</p>
N1  - <p>Cited By :5</p>
N1  - <p>Cited By :5</p>
N1  - <p>Cited By :5</p>
N1  - <p>Cited By :5</p>
N1  - <p>Cited By :5</p>
N1  - <p>Export Date: 2 December 2015</p>
N1  - <p>Export Date: 2 December 2015</p>
N1  - <p>Export Date: 2 December 2015</p>
N1  - <p>Export Date: 2 December 2015</p>
N1  - <p>Export Date: 3 December 2015</p>
N1  - <p>Export Date: 21 December 2015</p>
N1  - <p>Export Date: 21 December 2015</p>
KW  - Agricultural management
KW  - cash cropping
KW  - Copula model
KW  - Dynamic portfolio theory
KW  - Ecosystem service
KW  - land use planning
KW  - optimization
KW  - Resilience
KW  - risk factor
KW  - soil biota
KW  - Soil carbon
KW  - Soil ecosystem services
KW  - soil management
KW  - Soil organic carbon
KW  - soil organic matter
KW  - stochasticity
KW  - sustainable agriculture
ER  - 

TY  - JOUR
TI  - A methodological approach for deriving regional crop rotations as basis for the assessment of the impact of agricultural strategies using soil erosion as example
AU  - Lorenz, M.
AU  - Fürst, C.
AU  - Thiel, E.
T2  - Journal of Environmental Management
DA  - 2013///
PY  - 2013
DO  - 10.1016/j.jenvman.2013.04.050
VL  - 127
SP  - S37
EP  - S47
UR  - http://www.scopus.com/inward/record.url?eid=2-s2.0-84881668449&partnerID=40&md5=65152e90bbb993712ce414b53393bfdb
DB  - Scopus
N1  - <p>Cited By :8</p>
N1  - <p>Cited By :8</p>
N1  - <p>Cited By :8</p>
N1  - <p>Cited By :8</p>
N1  - <p>Cited By :8</p>
N1  - <p>Cited By :8</p>
N1  - <p>Cited By :8</p>
N1  - <p>Export Date: 2 December 2015</p>
N1  - <p>Export Date: 2 December 2015</p>
N1  - <p>Export Date: 2 December 2015</p>
N1  - <p>Export Date: 2 December 2015</p>
N1  - <p>Export Date: 3 December 2015</p>
N1  - <p>Export Date: 21 December 2015</p>
N1  - <p>Export Date: 21 December 2015</p>
KW  - Agricultural management
KW  - Agricultural practices
KW  - Agriculture
KW  - Article
KW  - Bioenergy
KW  - Climate
KW  - Conservation of Natural Resources
KW  - crop rotation
KW  - Crops, Agricultural
KW  - decision support system
KW  - drought stress
KW  - ecosystem
KW  - Ecosystem services
KW  - energy yield
KW  - environmental monitoring
KW  - funding
KW  - geography
KW  - Germany
KW  - government
KW  - Land management
KW  - land use planning
KW  - leaching
KW  - methodology
KW  - organic farming
KW  - Regional planning
KW  - Saxony
KW  - soil
KW  - Soil erosion
KW  - soil management
KW  - Soil protection
KW  - statistical analysis
KW  - strategic approach
KW  - Tillage
KW  - uncertainty analysis
ER  - 

TY  - JOUR
TI  - Indicators of soil ecosystem services in conventional and organic arable fields along a gradient of landscape heterogeneity in southern Sweden
AU  - Williams, A.
AU  - Hedlund, K.
T2  - Applied Soil Ecology
DA  - 2013///
PY  - 2013
DO  - 10.1016/j.apsoil.2012.12.019
VL  - 65
SP  - 1
EP  - 7
UR  - http://www.scopus.com/inward/record.url?eid=2-s2.0-84873304189&partnerID=40&md5=6187dd97cf0f14d61e1282f894920446
DB  - Scopus
N1  - <p>Cited By :19</p>
N1  - <p>Cited By :19</p>
N1  - <p>Cited By :19</p>
N1  - <p>Cited By :19</p>
N1  - <p>Cited By :19</p>
N1  - <p>Cited By :19</p>
N1  - <p>Cited By :19</p>
N1  - <p>Export Date: 2 December 2015</p>
N1  - <p>Export Date: 2 December 2015</p>
N1  - <p>Export Date: 2 December 2015</p>
N1  - <p>Export Date: 2 December 2015</p>
N1  - <p>Export Date: 3 December 2015</p>
N1  - <p>Export Date: 21 December 2015</p>
N1  - <p>Export Date: 21 December 2015</p>
KW  - Agriculture
KW  - carbon
KW  - Ecosystem services
KW  - Landscape complexity
KW  - Mycorrhizae
KW  - Soil microbial community
ER  - 

TY  - JOUR
TI  - Agroforestry and biochar to offset climate change: A review
AU  - Stavi, I.
AU  - Lal, R.
T2  - Agronomy for Sustainable Development
DA  - 2013///
PY  - 2013
DO  - 10.1007/s13593-012-0081-1
VL  - 33
IS  - 1
SP  - 81
EP  - 96
UR  - http://www.scopus.com/inward/record.url?eid=2-s2.0-84871948523&partnerID=40&md5=e619201301aa4c440edc4e3df91f7a12
DB  - Scopus
N1  - <p>Cited By :27</p>
N1  - <p>Cited By :27</p>
N1  - <p>Cited By :27</p>
N1  - <p>Cited By :27</p>
N1  - <p>Cited By :27</p>
N1  - <p>Cited By :27</p>
N1  - <p>Cited By :27</p>
N1  - <p>Export Date: 2 December 2015</p>
N1  - <p>Export Date: 2 December 2015</p>
N1  - <p>Export Date: 2 December 2015</p>
N1  - <p>Export Date: 2 December 2015</p>
N1  - <p>Export Date: 3 December 2015</p>
N1  - <p>Export Date: 21 December 2015</p>
N1  - <p>Export Date: 21 December 2015</p>
KW  - agricultural extension
KW  - agricultural soil
KW  - Agroforestry
KW  - agronomy
KW  - carbon dioxide
KW  - charcoal
KW  - Clean development mechanism
KW  - Climate change
KW  - Conservation agriculture
KW  - ecological footprint
KW  - Ecosystem service
KW  - Ecosystem services
KW  - food security
KW  - Global warming
KW  - greenhouse gas
KW  - Greenhouse gases
KW  - Nitrous oxide
KW  - organic carbon
KW  - Soil carbon
KW  - Soil organic carbon
ER  - 

TY  - JOUR
TI  - Influence of genetically modified organisms on agro-ecosystem processes
AU  - Kolseth, A.-K.
AU  - D'Hertefeldt, T.
AU  - Emmerich, M.
AU  - Forabosco, F.
AU  - Marklund, S.
AU  - Cheeke, T.E.
AU  - Hallin, S.
AU  - Weih, M.
T2  - Agriculture, Ecosystems and Environment
DA  - 2015///
PY  - 2015
DO  - 10.1016/j.agee.2015.08.021
VL  - 214
SP  - 96
EP  - 106
UR  - http://www.scopus.com/inward/record.url?eid=2-s2.0-84941056730&partnerID=40&md5=1ee50390e879ee09b043e3f0095e26e1
DB  - Scopus
N1  - <p>CODEN: AEEND</p>
N1  - <p>CODEN: AEEND</p>
N1  - <p>CODEN: AEEND</p>
N1  - <p>CODEN: AEEND</p>
N1  - <p>Correspondence Address: Kolseth, A.-K.; Swedish University of Agricultural Sciences, Department of Crop Production Ecology, P.O. Box 7043, Sweden</p>
N1  - <p>Correspondence Address: Kolseth, A.-K.; Swedish University of Agricultural Sciences, Department of Crop Production Ecology, P.O. Box 7043, Sweden</p>
N1  - <p>Correspondence Address: Kolseth, A.-K.; Swedish University of Agricultural Sciences, Department of Crop Production Ecology, P.O. Box 7043, Sweden</p>
N1  - <p>Correspondence Address: Kolseth, A.-K.; Swedish University of Agricultural Sciences, Department of Crop Production Ecology, P.O. Box 7043, Sweden</p>
N1  - <p>Export Date: 2 December 2015</p>
N1  - <p>Export Date: 2 December 2015</p>
N1  - <p>Export Date: 2 December 2015</p>
N1  - <p>Export Date: 2 December 2015</p>
N1  - <p>Export Date: 2 December 2015</p>
N1  - <p>Export Date: 2 December 2015</p>
N1  - <p>Export Date: 2 December 2015</p>
N1  - <p>Export Date: 2 December 2015</p>
N1  - <p>Export Date: 3 December 2015</p>
N1  - <p>Export Date: 21 December 2015</p>
N1  - <p>Export Date: 21 December 2015</p>
N1  - References: Alfred, J., Dangl, J.L., Kamoun, S., McCouch, S.R., New horizons for plant translational research (2014) PLoS Biol., 12, p. e1001880. , doi: 1001810.1001371/journal.pbio.1001880; 
Alston, J.M., Beddow, J.M., Pardey, P.G., Agricultural research, productivity, and food prices in the long run (2009) Science, 325, pp. 1209-1210;
Andronov, E.E., Petrova, S.N., Chizhevskaya, E.P., Korostik, E.V., Akhtemova, G.A., Pinaev, A.G., Influence of introducing the genetically modified strain Sinorhizobium meliloti ACH-5 on the structure of the soil microbial community (2009) Microbiology, 78, pp. 474-482;
Areal, F.J., Riesgo, L., Rodriguez-Cerezo, E., Economic and agronomic impact of commercialized GM crops: a meta-analysis (2013) J. Agric. Sci., 151, pp. 7-33;
Axelsson, E.P., Hjältén, J., LeRoy, C.J., Whitham, T.G., Julkunen-Tiitto, R., Wennström, A., Leaf litter from insect-resistant transgenic trees causes changes in aquatic insect community composition (2011) J. Appl. Ecol., 48, pp. 1472-1479;
Bagavathiannan, M.V., Norsworthy, J.K., Smith, K.L., Neve, P., Modeling the simultaneous evolution of resistance to ALS- and ACCase-inhibiting herbicides in barnyardgrass (Echinochloa crus-galli) in Clearfield® rice (2014) Weed Technol., 28, pp. 89-103;
Bankhead, S.B., Landa, B.B., Lutton, E., Weller, D.M., Gardener, B.B.M., Minimal changes in rhizobacterial population structure following root colonization by wild type and transgenic biocontrol strains (2004) FEMS Microbiol. Ecol., 49, pp. 307-318;
Baumgarte, S., Tebbe, C.C., Field studies on the environmental fate of the Cry1Ab Bt -toxin produced by transgenic maize (MON810) and its effect on bacterial communities in the maize rhizosphere (2005) Mol. Ecol., 14, pp. 2539-2551;
Beckie, H.J., Harker, K.N., Hall, L.M., Warwick, S.I., Legere, A., Sikkema, P.H., Clayton, G.W., Simard, M.J., A decade of herbicide-resistant crops in Canada (2006) Can. J. Plant Sci., 86, pp. 1243-1264;
Begg, G.S., Hockaday, S., McNicol, J.W., Askew, M., Squire, G.R., Modelling the persistence of volunteer oilseed rape (Brassica napus) (2006) Ecol. Modell., 198, pp. 195-207;
Behnke, K., Grote, R., Bruggemann, N., Zimmer, I., Zhou, G.W., Elobeid, M., Janz, D., Schnitzler, J.P., Isoprene emission-free poplars-a chance to reduce the impact from poplar plantations on the atmosphere (2012) New Phyt., 194, pp. 70-82;
Beltran, R.S., Kreidler, N., Van Vuren, D.H., Morrison, S.A., Zavaleta, E.S., Newton, K., TershyB, R., Croll, D.A., Passive recovery of vegetation after herbivore eradication on Santa Cruz Island, California (2014) Restor. Ecol., 22, pp. 790-797;
Benbrook, C.M., Impacts of genetically engineered crops on pesticide use in the US-the first sixteen years (2012) Environ. Sci. Eur., 24, p. 24;
Benedict, M., Eckerstorfer, M., Franz, G., Gaugitsch, H., Greiter, A., Heissenberger, A., Knols, B., Rabitsch, W., Defining environmental risk assessment criteria for genetically modified insects to be placed on the EU Market (2010), European Food Safety Authority; ParmaBirch, A.N.E., Griffiths, B.S., Caul, S., Thompson, J., Heckmann, L.H., Krogh, P.H., Cortet, J., The role of laboratory, glasshouse and field scale experiments in understanding the interactions between genetically modified crops and soil ecosystems: a review of the ECOGEN project (2007) Pedobiologia, 51, pp. 251-260;
Blackwood, C.B., Buyer, J.S., Soil microbial communities associated with Bt and non-Bt corn in three soils (2004) J. Environ. Qual., 33, pp. 832-836;
Bleck, G.T., White, B.R., Miller, D.J., Wheeler, M.B., Production of bovine alpha-lactalbumin in the milk of transgenic pigs (1998) J. Anim. Sci., 76, pp. 3072-3078;
Boete, C., Agusto, F.B., Reeves, R.G., Impact of mating behaviour on the success of malaria control through a single inundative release of transgenic mosquitoes (2014) J. Theor. Biol., 347, pp. 33-43;
Bosworth, A.H., Williams, M.K., Albrecht, K.A., Kwiatkowski, R., Beynon, J., Hankinson, T.R., Ronson, C.W., Triplett, E.W., Alfalfa yield response to inoculation with recombinant strains of Rhizobium meliloti with an extra copy of dctABD and/or modified nifA expression (1994) Appl. Environ. Microbiol., 60, pp. 3815-3832;
Brookes, G., Barfoot, P., Global impact of biotech crops: environmental effects, 1996-2008 (2010) AgBioForum, 13, pp. 76-94;
Brophy, B., Smolenski, G., Wheeler, T., Wells, D., L'Huillier, P., Laible, G., Cloned transgenic cattle produce milk with higher levels of beta-casein and kappa-casein (2003) Nat. Biotechnol., 21, pp. 157-161;
Butler, T.M., Fletcher, G.L., Promoter analysis of a growth hormone transgene in Atlantic salmon (2009) Theriogenology, 72, pp. 62-71;
Chambers, C.P., Whiles, M.R., Rosi-Marshall, E.J., Tank, J.L., Royer, T.V., Griffiths, N.A., Evans-White, M.A., Stojak, A.R., Responses of stream macroinvertebrates to Bt maize leaf detritus (2010) Ecol. Appl., 20, pp. 1949-1960;
Cheeke, T.E., Effects of the cultivation of genetically modified Bt crops on nontarget soil organisms (2012) Microbial Ecology in Sustainable Agroecosystems, pp. 153-227. , Boca Raton, CRC Press, T.E. Cheeke, D.C. Coleman, D.H. Wall (Eds.);
Cheeke, T.E., Cruzan, M.B., Rosenstiel, T.N., A field evaluation of arbuscular mycorrhizal fungal colonization in Bacillus thuringiensis toxin-expressing (Bt) and Non- Bt Maize (2013) Appl. Environ. Microbiol., 79, pp. 4078-4086;
Cheeke, T.E., Darby, H., Bever, J.D., Rosenstiel, T.N., Cruzan, M.B., Effect of Bt maize cultivation history on arbuscular mycorrhizal fungal colonization, spore abundance and diversity, and plant growth (2014) Agric. Ecosyst. Environ., 195, pp. 29-35;
Cheeke, T.E., Pace, B.A., Rosenstiel, T.N., Cruzan, M.B., The influence of fertilizer level and spore density on arbuscular mycorrhizal colonization of transgenic Bt 11 maize (Zea mays) in experimental microcosms (2011) FEMS Microbiol. Ecol., 75, pp. 304-312;
Cheeke, T.E., Rosenstiel, T.N., Cruzan, M.B., Evidence of reduced arbuscular mycorrhizal fungal colonization in multiple lines of Bt maize (2012) Am. J. Bot., 99, pp. 700-707;
Chen, D.H., Ye, G.Y., Yang, C.Q., Chen, Y., Wu, Y.K., Effect of introducing Bacillus thuringiensis gene on nitrogen metabolism in cotton (2005) Field Crop. Res., 92 (1), pp. 1-9;
Chen, W.Y., Wight, D.C., Wagner, T.E., Kopchick, J.J., Expression of a mutated bovine growth hormone gene suppresses growth of transgenic mice (1990) Proc. Natl. Acad. Sci. U. S. A., 87, pp. 5061-5065;
Clements, J.E., Wall, R.J., Narayan, O., Hauer, D., Schoborg, R., Sheffer, D., Powell, A., Rexroad, C.E., Development of transgenic sheep that express the visna virus envelope gene (1994) Virology, 200, pp. 370-380;
Constanzo, A., Barberi, P., Functional agrobiodiversity and agroecosystem services in sustainable wheat production. A review (2014) Agron. Sustain. Dev., 34, pp. 327-348;
Conner, A.J., Glare, T.R., Nap, J.P., The release of genetically modified crops into the environment-part II: overview of ecological risk assessment (2003) Plant J., 33, pp. 19-46;
D'Hertefeldt, T., Jørgensen, R.B., Pettersson, L.B., Long-term persistence of GM oilseed rape in the seedbank (2008) Biol. Lett., 4, pp. 314-317;
Damak, S., Su, H., Jay, N.P., Bullock, D.W., Su, H.Y., Improved wool production in transgenic sheep expressing insulin-like growth factor 1 (1996) Biotechnology, 14, pp. 185-188;
de Bello, F., Lavorel, S., Diaz, S., Harrington, R., Cornelissen, J.H.C., Bardgett, R.D., Berg, M.P., Harrison, P.A., Towards an assessment of multiple ecosystem processes and services via functional traits (2010) Biodivers. Conserv., 19, pp. 2873-2893;
de Vaufleury, A., Kramarz, P.E., Binet, P., Cortet, J., Caul, S., Andersen, M.N., Plumey, E., Krogh, P.H., Exposure and effects assessments of Bt -maize on non-target organisms (gastropods, microarthropods, mycorrhizal fungi) in microcosms (2007) Pedobiologia, 51, pp. 185-194;
Denning, C., Burl, S., Ainslie, A., Bracken, J., Dinnyes, A., Fletcher, J., King, T., de Sousa, P., Deletion of the alpha(1,3) galactosyl transferase (GGTA1) gene and the prion protein (PrP) gene in sheep (2001) Nat. Biotechnol., 19, pp. 559-562;
deRuyter, P., Kuipers, O.P., Meijer, W.C., deVos, W.M., Food-grade controlled lysis of Lactococcus lactis for accelerated cheese ripening (1997) Nat. Biotechnol., 15, pp. 976-979;
Devlin, R.H., Biagi, C.A., Yesaki, T.Y., Smailus, D.E., Byatt, J.C., Growth of domesticated transgenic fish (2001) Nature, 409, pp. 781-782;
Devos, Y., De Schrijver, A., De Clercq, P., Kiss, J., Romeis, J., Bt-maize event MON 88017 expressing Cry3Bb1 does not cause harm to non-target organisms (2012) Transgenic Res., 21, pp. 1191-1214;
Dohrmann, A.B., Kuting, M., Junemann, S., Jaenicke, S., Schluter, A., Tebbe, C.C., Importance of rare taxa for bacterial diversity in the rhizosphere of Bt - and conventional maize varieties (2013) ISME J., 7, pp. 37-49;
Downing, K.J., Leslie, G., Thomson, J.A., Biocontrol of the sugarcane borer Eldana saccharina by expression of the Bacillus thuringiensis cry1Ac7 and Serratia marcescens chiA genes in sugarcane-associated bacteria (2000) Appl. Environ. Microbiol., 66, pp. 2804-2810;
Drahos, D.J., Hemming, B.C., Mcpherson, S., Tracking recombinant organisms in the environment-beta-galactosidase as a selectable non-antibiotic marker for fluorescent Pseudomonas (1986) Biotechnology, 4, pp. 439-444;
Du, S.J., Gong, Z., Fletcher, G.L., Shears, M.A., King, M.J., Idler, D.R., Hew, C.L., Growth enhancement in transgenic Atlantic salmon by the use of an all fish chimeric growth hormone gene construct (1992) Nat. Biotechnol., 10, pp. 176-181;
Duan, J.J., Lundgren, J.G., Naranjo, S., Marvier, M., Extrapolating non-target risk of Bt crops from laboratory to field (2010) Biol. Lett., 6, pp. 74-77;
Duc, C., Nentwig, W., Lindfeld, A., No adverse effect of genetically modified antifungal wheat on decomposition dynamics and the soil fauna community-a field study (2011) PLoS One, 6, p. e25014. , doi:25010.21371/journal.pone.0025014;
Dunfield, K.E., Germida, J.J., Seasonal changes in the rhizosphere microbial communities associated with field-grown genetically modified canola (Brassica napus) (2003) Appl. Environ. Microbiol., 69, pp. 7310-7318;
Dunham, R.A., Warr, G.W., Nichols, A., Duncan, P.L., Argue, B., Middleton, D., Kucuktas, H., Enhanced bacterial disease resistance of transgenic channel catfish Ictalurus punctatus possessing cecropin genes (2002) Mar. Biotechnol., 4, pp. 338-344;
Edgerton, M.D., Increasing crop productivity to meet global needs for feed, food, and fuel (2009) Plant Physiol., 149, pp. 7-13;
Ellstrand, N.C., Current knowledge of gene flow in plants: implications for transgene flow (2003) Philo. Trans. R Soc. Lond. Ser. B Biol. Sci., 358, pp. 1163-1170;
Ellstrand, N.C., Meirmans, P., Rong, J., Bartsch, D., Ghosh, A., de Jong, T.J., Haccou, P., Hooftman, D., Introgression of crop alleles into wild or weedy populations (2013) Annu. Rev. Ecol. Evol. Systematics, 44, pp. 325-345;
http://ec.europa.eu/food/dyna/gm_register/gm_register_auth.cfm?pr_id=18, Accessed October 6th 2014EU Register of authorised GMOs (2014), http://ec.europa.eu/food/dyna/gm_register/gm_register_auth.cfm?pr_id=19, Accessed October 6th 2014Fang, H., Dong, B., Yan, H., Tang, F.F., Wang, B.C., Yu, Y.L., Effect of vegetation of transgenic Bt rice lines and their straw amendment on soil enzymes, respiration, functional diversity and community structure of soil microorganisms under field conditions (2012) J. Environ. Sci., 24, p. 1259;
Fletcher, G.L., Shears, M.A., Yaskowiak, E.S., King, M.J., Goddard, S.V., Gene transfer: potential to enhance the genome of Atlantic salmon for aquaculture (2004) Aust. J. Exp. Agric., 44, pp. 1095-1100;
Enviropig or FrankenSwine? Why genetically modifying pigs could cause a load of Manure (2010), http://documents.foodandwaterwatch.org/doc/Enviropig.pdf#_ga=1.175912866.181127406.1412596696, Fact sheet, June 2010. Accessed October 6th 2014Forabosco, F., Lohmus, M., Rydhmer, L., Sundström, L.F., Genetically modified farm animals and fish in agriculture: a review (2013) Livest. Sci., 153, pp. 1-9;
Forsberg, C.W., Meidinger, R.G., Phillips, J.P., (2009) Developments on the EnviropigTM file 28th Centralia Swine Research Update, , http://www.centraliaswineresearch.ca/proconline.html;
Franchi, E., Tosi, C., Scolla, G., Della Penna, G., Rodriguez, F., Pedroni, P.M., Metabolically engineered Rhodobacter sphaeroides RV strains for improved biohydrogen photoproduction combined with disposal of food wastes (2004) Mar. Biotechnol., 6, pp. 552-565;
Freedman, B., Catling, P.M., Lucas, Z., Effects of feral horses on vegetation of Sable Island, Nova Scotia (2011) Can. Field-Nat., 125, pp. 200-212;
Gassmann, A.J., Petzold-Maxwell, J.L., Clifton, E.H., Dunbar, M.W., Hoffmann, A.M., Ingber, D.A., Keweshan, R.S., Field-evolved resistance by western corn rootworm to multiple Bacillus thuringiensis toxins in transgenic maize (2014) Proc. Natl. Acad. Sci. U. S. A., 111, pp. 5141-5146;
Gilbert, N., A hard look at GM crops (2013) Nature, 497, pp. 24-26;
Gliddon, C., The impacts of hybrids between genetically modified crop plants and their related species-biological models and their perspectives (1994) Mol. Ecol., 3, pp. 41-44;
Golovan, S.P., Meidinger, R.G., Ajakaiye, A., Cottrill, M., Wiederkehr, M.Z., Barney, D.J., Plante, C., Forsberg, C.W., Pigs expressing salivary phytase produce low-phosphorus manure (2001) Nat. Biotechnol., 19, p. 741;
Griffiths, B.S., Caul, S., Thompson, J., Birch, A.N.E., Cortet, J., Andersen, M.N., Krogh, P.H., Microbial and microfaunal community structure in cropping systems with genetically modified plants (2007) Pedobiologia, 51, pp. 195-206;
Grime, J.P., Benefits of plant diversity to ecosystems: immediate, filter and founder effects (1998) J. Ecol., 86, pp. 902-910;
Haegele, J.W., Below, F.E., Transgenic corn rootworm protection increases grain yield and nitrogen use of maize (2013) Crop Sci., 53, pp. 585-594;
Haney, R.L., Senseman, S.A., Hons, F.M., Effect of roundup ultra on microbial activity and biomass from selected soils (2002) J. Environ. Qual., 31, pp. 730-735;
Hannula, S.E., de Boer, W., van Veen, J., A 3-year study reveals that plant growth stage, season and field site affect soil fungal communities while cultivar and GM-trait have minor effects (2012) PLoS One, 7, p. e33819. , 33810.31371/journal.pone.0033819;
Harker, K.N., O'Donovan, J.T., Blackshaw, R.E., Beckie, H.J., Mallory-Smith, C., Maxwell, B.D., Our view (2012) Weed Sci., 60, pp. 143-144;
Haro, M.A., de Lorenzo, V., Metabolic engineering of bacteria for environmental applications: construction of Pseudomonas strains for biodegradation of 2-chlorotoluene (2001) J. Biotechnol., 85, pp. 103-113;
Hawes, C., Haughton, A.J., Osborne, J.L., Roy, D.B., Clark, S.J., Perry, J.N., Rothery, P., Squire, G.R., Responses of plants and invertebrate trophic groups to contrasting herbicide regimes in the Farm Scale Evaluations of genetically modified herbicide tolerant crops (2003) Philo. Trans. R. Soc. Lond. Ser. B Biol. Sci., 358, pp. 1899-1913;
Heap, I., The international survey of herbicide resistant weeds (2014), http://www.weedscience.com, Accessed October 6th 2014Hegarty, R.S., Reducing rumen methane emissions through elimination of rumen protozoa (1999) Aust. J. Agric. Res., 50, pp. 1321-1327;
Herrero, O., Ramon, D., Orejas, M., Engineering the Saccharomyces cerevisiae isoprenoid pathway for de novo production of aromatic monoterpenes in wine (2008) Metab. Eng., 10, pp. 78-86;
Hew, C., Poon, R., Xiong, F., Gauthier, S., Shears, M., King, M., Davies, P., Fletcher, G., Liver-specific and seasonal expression of transgenic Atlantic salmon harboring the winter flounder antifreeze protein gene (1999) Transgenic Res., 8, pp. 405-414;
Hook, S.E., Wright, A.D.G., McBride, B.W., Methanogens: methane producers of the rumen and mitigation strategies (2010), ArchaeaIcoz, I., Stotzky, G., Fate and effects of insect-resistant Bt crops in soil ecosystems (2008) Soil Biol. Biochem., 40, pp. 559-586;
Itakura, M., Uchida, Y., Akiyama, H., Hoshino, Y.T., Shimomura, Y., Morimoto, S., Tago, K., Minamisawa, K., Mitigation of nitrous oxide emissions from soils by Bradyrhizobium japonicum inoculation (2013) Nat. Clim. Change, 3, pp. 208-212;
Joutsjoki, V., Luoma, S., Tamminen, M., Kilpi, M., Johansen, E., Palva, A., Recombinant Lactococcus starters as a potential source of additional peptidolytic activity in cheese ripening (2002) J. Appl. Microbiol., 92, pp. 1159-1166;
Kawata, M., Murakami, K., Ishikawa, T., Dispersal and persistence of genetically modified oilseed rape around Japanese harbors (2009) Environ. Sci. Pollut. Res., 16, pp. 120-126;
Kerovuo, J., Tynkkynen, S., Expression of Bacillus subtilis phytase in Lactobacillus plantarum 755 (2000) Lett. Appl. Microbiol., 30, pp. 325-329;
Konishi, K., Yonai, M., Kaneyama, K., Ito, S., Matsuda, H., Yoshioka, H., Nagai, T., Imai, K., Relationships of survival time, productivity and cause of death with telomere lengths of cows produced by somatic cell nuclear transfer (2011) J. Reprod. Dev., 57, pp. 572-578;
Lachnicht, S.L., Hendrix, P.F., Potter, R.L., Coleman, D.C., Crossley, D.A., Winter decomposition of transgenic cotton residue in conventional till and no-till systems (2004) Appl. Soil Ecol., 27, pp. 135-142;
Lai, L., Kang, J.X., Li, R., Wang, J., Witt, W.T., Yong, H.Y., Hao, Y., Dai, Y., Generation of cloned transgenic pigs rich in omega-3 fatty acids (2006) Nat. Biotechnol., 24, pp. 435-436;
Lau, W., Fischbach, M.A., Osbourn, A., Sattely, E.S., Key applications of plant metabolic engineering (2014) PLoS Biol, 12. , e1001879, doi: 1001810.1001371/journal.pbio.1001879;
Légère, A., Simard, M.J., Johnson, E., Stevenson, F.C., Beckie, H., Blackshaw, R.E., Control of volunteer canola with herbicides: effects of plant growth stage and cold acclimation (2006) Weed Technol., 20, pp. 485-493;
Li, L., Pitcher, T.J., Devlin, R.H., Potential risks of trophic impacts by escaped transgenic salmon in marine environments (2015) Environ. Conserv., 42, pp. 152-161;
Li, X.G., Liu, B.A., Cui, J.J., Liu, D.D., Ding, S.A., Gilna, B., Luo, J.Y., Han, Z.M., No evidence of persistent effects of continuously planted transgenic insect-resistant cotton on soil microorganisms (2011) Plant Soil, 339, pp. 247-257;
Lilley, A.K., Bailey, M.J., The acquisition of indigenous plasmids by a genetically marked pseudomonad population colonizing the sugar beet phytosphere is related to local environmental conditions (1997) Appl. Environ. Microbiol., 63, pp. 1577-1583;
Lilley, A.K., Bailey, M.J., Barr, M., Kilshaw, K., Timms-Wilson, T.M., Day, M.J., Norris, S.J., Godfray, H.C.J., Population dynamics and gene transfer in genetically modified bacteria in a model microcosm (2003) Mol. Ecol., 12, pp. 3097-3107;
Liu, J., Yan, G., Shu, C., Zhao, C., Liu, C., Song, F., Zhou, L., Huang, D., Construction of a Bacillus thuringiensis engineered strain with high toxicity and broad pesticidal spectrum against coleopteran insects (2010) Appl. Microbiol. Biotechnol., 87, pp. 243-249;
Liu, W., Lu, H.H., Wu, W., Wei, Q.K., Chen, Y.X., Thies, J.E., Transgenic Bt rice does not affect enzyme activities and microbial composition in the rhizosphere during crop development (2008) Soil Biol. Biochem., 40, pp. 475-486;
Lo, D., Pursel, V., Linton, P.J., Sandgren, E., Behringer, R., Rexroad, C., Palmiter, R.D., Brinster, R.L., Expression of mouse IgA by transgenic mice, pigs and sheep (1991) Eur. J. Immunol., 21, pp. 1001-1006;
Londo, J.P., Bollman, M.A., Sagers, C.L., Lee, E.H., Watrud, L.S., Changes in fitness-associated traits due to the stacking of transgenic glyphosate resistance and insect resistance in Brassica napus L (2011) Heredity, 107, pp. 328-337;
Londo, J.P., Bollman, M.A., Sagers, C.L., Lee, E.H., Watrud, L.S., Glyphosate-drift but not herbivory alters the rate of transgene flow from single and stacked trait transgenic canola (Brassica napus) to nontransgenic B. napusandB. rapa (2011) New Phyt., 191, pp. 840-849;
Londoño-R, L.M., Tarkalson, D., Thies, J.E., In field rates of decomposition and microbial communities colonizing residues vary by depth of residue placement and plant part, but not by crop genotype for residues from two Cry1Ab Bt corn hybrids and their non-transgenic isolines (2013) Soil Biol. Biochem., 57, pp. 349-355;
Lu, H.H., Wu, W.X., Chen, Y.X., Zhang, X.J., Devare, M., Thies, J.E., Decomposition of Bt transgenic rice residues and response of soil microbial community in rapeseed-rice cropping system (2010) Plant Soil, 336, pp. 279-290;
Lu, Y.H., Wu, K.M., Jiang, Y.Y., Xia, B., Li, P., Feng, H.Q., Wyckhuys, K.A.G., Guo, Y.Y., Mirid bug outbreaks in multiple crops correlated with wide scale adoption of Bt cotton in China (2010) Science, 328, pp. 1151-1154;
Lupwayi, N.Z., Hanson, K.G., Harker, K.N., Clayton, G.W., Blackshaw, R.E., O'Donovan, J.T., Johnson, E.N., Monreal, M.A., Soil microbial biomass, functional diversity and enzyme activity in glyphosate-resistant wheat-canola rotations under low-disturbance direct seeding and conventional tillage (2007) Soil Biol. Biochem., 39, pp. 1418-1427;
Lyall, J., Irvine, R.M., Sherman, A., McKinley, T.J., Nunez, A., Purdie, A., Outtrim, L., Tiley, L., Suppression of avian influenza transmission in genetically modified chickens (2011) Science, 331, pp. 223-226;
Marshall, J.M., The cartagena protocol and genetically modified mosquitoes (2010) Nat. Biotechnol., 28, pp. 896-897;
Marvier, M., Using meta-analysis to inform risk assessment and risk management (2011) J. Consum. Prot. Food Saf., 6, pp. 113-118;
Medeiros, E., Phelps, M., Fuentes, F., Bradley, T., Overexpression of follistatin in trout stimulates increased muscling (2009) Am. J. Physiol. Regul. Integr. Comp. Physiol., 297, pp. R235-R242;
(2014), http://www.monsanto.com/products/pages/refuge.aspx, Accessed October 6th 2014(2014), http://www.monsanto.com/products/pages/refuge-in-the-bag-corn-products.aspx, Accessed October 6th 2014Mortensen, D.A., Egan, J.F., Maxwell, B.D., Ryan, M.R., Smith, R.G., Navigating a critical juncture for sustainable weed management (2012) Bioscience, 62, pp. 75-84;
Motavalli, P.P., Kremer, R.J., Fang, M., Means, N.E., Impact of genetically modified crops and their management on soil microbially mediated plant nutrient ransformations (2004) J. Environ. Qual., 33, pp. 816-824;
Mozdziak, P.E., Pophal, S., Borwornpinyo, S., Petitte, J.N., Transgenic chickens expressing beta-galactosidase hydrolyze lactose in the intestine (2003) J. Nutr., 133, pp. 3076-3079;
Mueller, N.D., Gerber, J.S., Johnston, M., Ray, D.K., Ramankutty, N., Foley, J.A., Closing yield gaps through nutrient and water management (2012) Nature, 490, pp. 254-257;
Mungai, N.W., Motavalli, P.P., Nelson, K.A., Kremer, R.J., Differences in yields, residue composition and N mineralization dynamics of Bt and non- Bt maize (2005) Nutr. Cycl. Agroecosyst., 73, pp. 101-109;
Naik, G., Qaim, M., Subramanian, A., Zilberman, D., Bt cotton controversy: some paradoxes explained (2005) Econ. Polit. Wkly., 40, pp. 1514-1517;
Nam, Y.K., Maclean, N., Hwang, G., Kim, D.S., Autotransgenic and allotransgenic manipulation of growth traits in fish for aquaculture: a review (2008) J. Fish Biol., 72 (1), pp. 1-26;
Naranjo, S.E., Impacts of Bt transgenic cotton on integrated pest management (2011) J. Agric. Food Chem., 59, pp. 5842-5851;
Nottle, M.B., Nagashima, H., Verma, P.J., Du, Z.T., Grupen, C.G., McIlfatrick, S.M., Ashman, R.J., Robins, A.J., Production and analysis of transgenic pigs containing a metallothionein porcine growth hormone gene construct (1999) Transgenic Animals in Agriculture, pp. 145-156. , CABI, Wallingford, J.D. Murray, G.B. Anderson, A.M. Oberbauer, M.M. McGloughlin (Eds.);
Oh, Y.K., Raj, S.M., Jung, G.Y., Park, S., Current status of the metabolic engineering of microorganisms for biohydrogen production (2011) Bioresour. Technol., 102, pp. 8357-8367;
Philippot, L., Hallin, S., Towards food, feed and energy crops mitigating climate change (2011) Trends Plant Sci., 16, pp. 476-480;
Philippot, L., Kuffner, M., Cheneby, D., Depret, G., Laguerre, G., Martin-Laurent, F., Genetic structure and activity of the nitrate-reducers community in the rhizosphere of different cultivars of maize (2006) Plant Soil, 287, pp. 177-186;
Phillips, J.P., Golovan, S.P., Meidinger, R.G., Forsberg, C.W., Transgenic enhancement of nutrient cycling: moving toward an environmentally sustainable animal agriculture, Proceedings of the 8th World Congress on Genetics Applied to Livestock Production, Belo Horizonte, Minas Gerais, Brazil, 13-18 August, 2006 (2006), pp. 19-20. , Instituto Prociencia, Minas GeraisPleasants, J.M., Oberhauser, K.S., Milkweed loss in agricultural fields because of herbicide use: effect on the monarch butterfly population (2013) Insect Conserv. Divers., 6, pp. 135-144;
Pursel, V.G., Sutrave, P., Wall, R.J., Kelly, A.M., Hughes, S.H., Transfer of C-Ski gene into swine to enhance muscle development (1992) Theriogenology, 37, p. 278;
Ramsay, G., Thompson, C., Squire, G., Quantifying landscape-scale gene flow in oilseed rape (2003), Department for Environment, Food and Rural Affairs; LondonRanathunge, K., El-Kereamy, A., Gidda, S., Bi, Y.M., Rothstein, S.J., AMT11 transgenic rice plants with enhanced NH<inf>4</inf> permeability show superior growth and higher yield under optimal and suboptimal NH<inf>4</inf> conditions (2014) J. Exp. Bot., 65, pp. 965-979;
Ray, D.K., Ramankutty, N., Mueller, N.D., West, P.C., Foley, J.A., Recent patterns of crop yield growth and stagnation (2012), 3, p. 1293. , Nat. Commun, doi: 1210.1038/ncomms2296Reeves, R.G., Denton, J.A., Santucci, F., Bryk, J., Reed, F.A., Scientific standards and the regulation of genetically modified insects (2012) PLoS Negl. Trop. Dis, 6, p. e1502. , doi: 1510.1371/journal.pntd.0001502;
Reh, W.A., Maga, E.A., Collette, N.M., Moyer, A., Conrad-Brink, J.S., Taylor, S.J., DePeters, E.J., Murray, J.D., Hot topic: using a stearoyl-CoA desaturase transgene to alter milk fatty acid composition (2004) J. Dairy Sci., 87, pp. 3510-3514;
Richardson, D., Felgate, H., Watmough, N., Thomson, A., Baggs, E., Mitigating release of the potent greenhouse gas N<inf>2</inf>O from the nitrogen cycle-could enzymic regulation hold the key? (2009) Trends Biotechnol., 27, pp. 388-397;
Richt, J.A., Kasinathan, P., Hamir, A.N., Castilla, J., Sathiyaseelan, T., Vargas, F., Sathiyaseelan, J., Kuroiwa, Y., Production of cattle lacking prion protein (2007) Nat. Biotechnol., 25, pp. 132-138;
Ripp, S., Nivens, D.E., Ahn, Y., Werner, C., Jarrell, J., Easter, J.P., Cox, C.D., Sayler, G.S., Controlled field release of a bioluminescent genetically engineered microorganism for bioremediation process monitoring and control (2000) Environ. Sci. Technol., 34, pp. 846-853;
Ross, E.M., Moate, P.J., Marett, L., Cocks, B.G., Hayes, B.J., Investigating the effect of two methane-mitigating diets on the rumen microbiome using massively parallel sequencing (2013) J. Dairy Sci., 96. , 1-17;
Saeki, K., Matsumoto, K., Kinoshita, M., Suzuki, I., Tasaka, Y., Kano, K., Taguchi, Y., Iritani, A., Functional expression of a Delta12 fatty acid desaturase gene from spinach in transgenic pigs (2004) Proc. Natl. Acad. Sci. U. S. A, 101, pp. 6361-6366;
Salter, D.W., Crittenden, L.B., Artificial insertion of a dominant gene for resistance to avian leukosis virus into the germ line of the chicken (1989) Theor. Appl. Genet., 77. , 457-461;
Sarkar, B., Patra, A.K., Purakayastha, T.J., Transgenic Bt -cotton affects enzyme activity and nutrient availability in a sub-tropical inceptisol (2008) J. Agron. Crop Sci., 194, pp. 289-296;
Schafer, M.G., Ross, A.A., Londo, J.P., Burdick, C.A., Lee, E.H., Travers, S.E., Van de Water, P.K., Sagers, C.L., The establishment of genetically engineered Canola populations in the US (2011) PLoS One, 6, p. e25736. , doi: 25710.21371/journal.pone.0025736;
Scharfen, E.C., Mills, D.A., Maga, E.A., Use of human lysozyme transgenic goat milk in cheese making: effects on lactic acid bacteria performance (2007) J. Dairy Sci., 90, pp. 4084-4091;
Schmalenberger, A., Tebbe, C.C., Genetic profiling of noncultivated bacteria from the rhizospheres of sugar beet (Beta vulgaris) reveal field and annual variability but no effect of a transgenic herbicide resistance (2003) Can. J. Microbiol., 49, pp. 1-8;
Schwartz, M.W., Brigham, C.A., Hoeksema, J.D., Lyons, K.G., Mills, M.H., van Mantgem, P.J., Linking biodiversity to ecosystem function: implications for conservation ecology (2000) Oecologia, 122, pp. 297-305;
Schwieger, F., Tebbe, C.C., Effect of field inoculation with Sinorhizobium meliloti L33 on the composition of bacterial communities in rhizospheres of a target plant (Medicago sativa) and a non-target plant (Chenopodium album)-linking of 16S rRNA gene-based single-strand conformation polymorphism community profiles to the diversity of cultivated bacteria (2000) Appl. Environ. Microbiol, 66, pp. 3556-3565;
Sessitsch, A., Gyamfi, S., Tscherko, D., Gerzabek, M.H., Kandeler, E., Activity of microorganisms in the rhizosphere of herbicide treated and untreated transgenic glufosinate-tolerant and wildtype oilseed rape grown in containment (2004) Plant Soil, 266, pp. 105-116;
Sester, M., Darmency, H., Colbach, N., Contribution of groundkeepers vs. weed beet to gene escape from sugar beet (Beta vulgaris spp.). Consequences for growing genetically-modified sugar beet-a modelling approach (2012) Field Crop. Res., 135, pp. 46-57;
Shen, R.F., Cai, H., Gong, W.H., Transgenic Bt cotton has no apparent effect on enzymatic activities or functional diversity of microbial communities in rhizosphere soil (2006) Plant Soil, 285, pp. 149-159;
Shi, G.M., Chavas, J.P., Lauer, J., Commercialized transgenic traits, maize productivity and yield risk (2013) Nat. Biotechnol., 31, pp. 111-114;
Shintani, M., Matsui, K., Inoue, J., Hosoyama, A., Ohji, S., Yamazoe, A., Nojiri, H., Ohkuma, M., Single-cell analyses revealed transfer ranges of IncP-1, IncP-7, and IncP-9 plasmids in a soil bacterial community (2014) Appl. Environ. Microbiol., 80, pp. 138-145;
Shu, Y.H., Ma, H.H., Du, Y., Li, Z.X., Feng, Y.J., Wang, J.W., The presence of Bacillus thuringiensis (Bt) protein in earthworms Eisenia fetida has no deleterious effects on their growth and reproduction (2011) Chemosphere, 85, pp. 1648-1656;
Skot, L., Harrison, S.P., Nath, A., Mytton, L.R., Clifford, B.C., Expression of insecticidal activity in Rhizobium containing the delta-endotoxin gene cloned from Bacillus thuringiensis subsp. tenebrionis (1990) Plant Soil, 127, pp. 285-295;
Squire, G.R., Breckling, B., Dietz, P., feilstetter, A., Jørgensen, R.B., Lecomte, J., Pivard, S., Young, M.W., Status of feral oilseed rape in Europe: its minor role as a GM impurity and its potential as a reservoir of transgene persistence (2011) Environ. Sci. Pollut. Res., 18, pp. 111-115;
Squire, G.R., Brooks, D.R., Bohan, D.A., Champion, G.T., Daniels, R.E., Haughton, A.J., Hawes, C., Firbank, L.G., On the rationale and interpretation of the farm scale evaluations of genetically modified herbicide-tolerant crops (2003) Philo. Trans. R. Soc. Lond. Ser. B Biol. Sci., 358, pp. 1779-1799;
Steinfeld, H., Gerber, P., Wassenaar, T., Castel, V., Rosales, M., de Haan, C., (2006) Livestock's long shadow, , United Nations Food and Agriculture Organization, Rome;
Subbarao, G.V., Ishikawa, T., Ito, O., Nakahara, K., Wang, H.Y., Berry, W.L., A biolumiuescence assay to detect nitrification inhibitors released from plant roots: a case study with Brachiaria humidicola (2006) Plant Soil, 288, pp. 101-112;
Subbarao, G.V., Nakahara, K., Hurtado, M.P., Ono, H., Moreta, D.E., Salcedo, A.F., Yoshihashi, A.T., Ito, O., Evidence for biological nitrification inhibition in Brachiaria pastures (2009) Proc. Natl. Acad. Sci. U. S. A., 106, pp. 17302-17307;
Subbarao, G.V., Tomohiro, B., Masahiro, K., Osamu, I., Samejima, H., Wang, H.Y., Pearse, S.J., Berry, W.L., Can biological nitrification inhibition (BNI) genes from perennial Leymus racemosus (Triticeae) combat nitrification in wheat farming? (2007) Plant Soil, 299, pp. 55-64;
Sundström, L.F., Lohmus, M., Devlin, R.H., Migration and growth potential of coho salmon smolts: implications for ecological impacts from growth-enhanced fish (2010) Ecol. Appl., 20, pp. 1372-1383;
Sutton, M.A., Oenema, O., Erisman, J.W., Leip, A., van Grinsven, H., Winiwarter, W., Too much of a good thing (2011) Nature, 472, pp. 159-161;
Swan, C.M., Jensen, P.D., Dively, G.P., Lamp, W.O., Processing of transgenic crop residues in stream ecosystems (2009) J. Appl. Ecol., 46, pp. 1304-1313;
Sybesma, W., van den Born, E., Starrenburg, M., Mierau, I., Kleerebezem, M., de Vos, W.M., Hugenholtz, J., Controlled modulation of folate polyglutamyl tail length by metabolic engineering of Lactococcus lactis (2003) Appl. Environ. Microbiol., 69, pp. 7101-7107;
Tabashnik, B.E., Brevault, T., Carriere, Y., Insect resistance to Bt crops: lessons from the first billion acres (2013) Nat. Biotechnol., 31, pp. 510-521;
Tabashnik, B.E., Sisterson, M.S., Ellsworth, P.C., Dennehy, T.J., Antilla, L., Liesner, L., Whitlow, M., Carriere, Y., Suppressing resistance to Bt cotton with sterile insect releases (2010) Nat. Biotechnol., 28, pp. 1304-1309;
Thomas, D.D., Donnelly, C.A., Wood, R.J., Alphey, L.S., Insect population control using a dominant, repressible, lethal genetic system (2000) Science, 287, pp. 2474-2476;
Timms-Wilson, T.M., Ellis, R.J., Renwick, A., Rhodes, D.J., Mavrodi, D.V., Weller, D.M., Thomashow, L.S., Bailey, M.J., Chromosomal insertion of phenazine-1-carboxylic acid biosynthetic pathway enhances efficacy of damping-off disease control by Pseudomonas fluorescens (2000) Mol. Plant Microbe Interact., 13, pp. 1293-1300;
Tong, J., Wei, H., Liu, X., Hu, W., Bi, M., Wang, Y., Li, Q., Li, N., Production of recombinant human lysozyme in the milk of transgenic pigs (2011) Transgenic Res., 20, pp. 417-419;
Udayasuriyan, V., Nakamura, A., Masaki, H., Uozumi, T., Transfer of an insecticidal protein gene of Bacillus thuringiensis into plant-colonizing Azospirillum (1995) World J. Microbiol. Biotechnol., 11, pp. 163-167;
Valls, M., Atrian, S., de Lorenzo, V., Fernandez, L.A., Engineering a mouse metallothionein on the cell surface of Ralstonia eutropha CH34 for immobilization of heavy metals in soil (2000) Nat. Biotechnol., 18, pp. 661-665;
van Dillewijn, P., Soto, M.J., Villadas, P.J., Toro, N., Construction and environmental release of a Sinorhizobium meliloti strain genetically modified to be more competitive for alfalfa nodulation (2001) Appl. Environ. Microbiol., 67, pp. 3860-3865;
van Dillewijn, P., Villadas, P.J., Toro, N., Effect of a Sinorhizobium meliloti strain with a modified putA gene on the rhizosphere microbial community of alfalfa (2002) Appl. Environ. Microbiol., 68, pp. 4201-4208;
Vauramo, S., Pasonen, H.L., Pappinen, A., Setala, H., Decomposition of leaf litter from chitinase transgenic silver birch (Betula pendula) and effects on decomposer populations in a field trial (2006) Appl. Soil Ecol., 32, pp. 338-349;
Verwaal, R., Wang, J., Meijnen, J.-P., Visser, H., Sandmann, G., van den Berg, J.A., van Ooyen, A.J.J., High-level production of beta-carotene in Saccharomyces cerevisiae by successive transformation with carotenogenic genes from Xanthophyllomyces dendrorhous (2007) Appl. Environ. Microbiol., 73, pp. 4342-4350;
Vicedo, B., Penalver, R., Asins, M.J., Lopez, M.M., Biological control of Agrobacterium tumefaciens, colonization, and pAgK48 transfer with Agrobacterium radiobacter K84 and the Tra-mutant K1060 (1993) Appl. Environ. Microbiol., 59, pp. 309-315;
Wall, R.J., Powell, A.M., Paape, M.J., Kerr, D.E., Bannerman, D.D., Pursel, V.G., Wells, K.D., Hawk, H.W., Genetically enhanced cows resist intramammary Staphylococcus aureus infection (2005) Nat. Biotechnol., 23, pp. 445-451;
Wan, S., Johnson, A.M., Altosaar, I., Expression of nitrous oxide reductase from Pseudomonas stutzeri in transgenic tobacco roots using the root-specific rolD promoter from Agrobacterium rhizogenes (2012) Ecol. Evol, 2, pp. 286-297;
Wang, C.X., Knill, E., Glick, B.R., Defago, G., Effect of transferring 1-aminocyclopropane-1-carboxylic acid (ACC) deaminase genes into Pseudomonas fluorescens strain CHA0 and its gacA derivative CHA96 on their growth-promoting and disease-suppressive capacities (2000) Can. J. Microbiol., 46, pp. 898-907;
Warwick, S.I., Legere, A., Simard, M.J., James, T., Do escaped transgenes persist in nature? The case of an herbicide resistance transgene in a weedy Brassica rapa population (2008) Mol. Ecol., 17, pp. 1387-1395;
Watrud, L.S., King, G., Londo, J.P., Colasanti, R., Smith, B.M., Waschmann, R.S., Lee, E.H., Changes in constructed Brassica communities treated with glyphosate drift (2011) Ecol. Appl., 21, pp. 525-538;
Weih, M., Trade-offs in plants and the prospects for breeding using modern biotechnology (2003) New Phyt., 158, pp. 7-9;
Weih, M., Didon, U.M.E., Rönnberg-Wästljung, A.C., Böjrkman, C., Integrated agricultural research and crop breeding: allelopathic weed control in cereals and long-term productivity in perennial bionmass crops (2008) Agric. Syst., 97, pp. 99-107;
Weih, M., Hoeber, S., Beyer, F.P.F., Traits to ecosystems: the ecological sustainability challenge when developing future energy crops (2014) Front. Energy Res., 2, p. 17;
Whitham, T.G., Bailey, J.K., Schweitzer, J.A., Shuster, S.M., Bangert, R.K., Leroy, C.J., Lonsdorf, E.V., Wooley, S.C., A framework for community and ecosystem genetics: from genes to ecosystems (2006) Nat. Rev. Genet., 7, pp. 510-523;
Wimmer, E.A., Applications of insect transgenesis (2003) Nat. Rev. Genet., 4, pp. 225-232;
Wu, X., Ouyang, H., Duan, B., Pang, D., Zhang, L., Yuan, T., Xue, L., Li, G.P., Production of cloned transgenic cow expressing omega-3 fatty acids (2012) Transgenic Res., 21, pp. 537-543;
Xu, Z., Hennessy, D.A., Sardana, K., Moschini, G., The realized yield effect of genetically engineered crops: US maize and soybean (2013) Crop Sci., 53, pp. 735-745;
Yang, B., Wang, J., Tang, B., Liu, Y., Guo, C., Yang, P., Yu, T., Li, N., Characterization of bioactive recombinant human lysozyme expressed in milk of cloned transgenic cattle (2011) PLoS One, 6, p. e17593;
Yanni, S.F., Whalen, J.K., Ma, B.L., Crop residue chemistry, decomposition rates, and CO<inf>2</inf> evolution in Bt and non- Bt corn agroecosystems in North America: a review (2010) Nutr. Cycl. Agroecosyst., 87, pp. 277-293;
Zapiola, M.L., Campbell, C.K., Butler, M.D., Mallory-Smith, C.A., Escape and establishment of transgenic glyphosate-resistant creeping bentgrass Agrostis stolonifera in Oregon, USA: a 4-year study (2008) J. Appl. Ecol., 45, pp. 486-494;
Zapiola, M.L., Mallory-Smith, C.A., Crossing the divide: gene flow produces intergeneric hybrid in feral transgenic creeping bentgrass population (2012) Mol. Ecol., 21, pp. 4672-4680;
Zeller, S.L., Kalinina, O., Brunner, S., Keller, B., Schmid, B., Transgene x environment interactions in genetically modified wheat (2010) PLoS One, 5. , e11405, doi: 11410.11371/journal.pone.0011405;
Zhang, H.N., Tian, W., Zhao, J., Jin, L., Yang, J., Liu, C.H., Yang, Y.H., Wu, Y.D., Diverse genetic basis of field-evolved resistance to Bt cotton in cotton bollworm from China (2012) Proc. Natl. Acad. Sci. U. S. A., 109, pp. 10275-10280;
Zhao, J.H., Ho, P., Azadi, H., Benefits of Bt cotton counterbalanced by secondary pests? Perceptions of ecological change in China (2011) Environ. Monit. Assess., 173, pp. 985-994;
Zilberman, D., Sexton, S.E., Marra, M., Fernandez-Cornejo, F., The economic impact of genetically engineered crops (2010) Choices Mag. Food Farm Resour., (2). , Issues 25
N1  - References: Alfred, J., Dangl, J.L., Kamoun, S., McCouch, S.R., New horizons for plant translational research (2014) PLoS Biol., 12, p. e1001880. , doi: 1001810.1001371/journal.pbio.1001880; 
Alston, J.M., Beddow, J.M., Pardey, P.G., Agricultural research, productivity, and food prices in the long run (2009) Science, 325, pp. 1209-1210;
Andronov, E.E., Petrova, S.N., Chizhevskaya, E.P., Korostik, E.V., Akhtemova, G.A., Pinaev, A.G., Influence of introducing the genetically modified strain Sinorhizobium meliloti ACH-5 on the structure of the soil microbial community (2009) Microbiology, 78, pp. 474-482;
Areal, F.J., Riesgo, L., Rodriguez-Cerezo, E., Economic and agronomic impact of commercialized GM crops: a meta-analysis (2013) J. Agric. Sci., 151, pp. 7-33;
Axelsson, E.P., Hjältén, J., LeRoy, C.J., Whitham, T.G., Julkunen-Tiitto, R., Wennström, A., Leaf litter from insect-resistant transgenic trees causes changes in aquatic insect community composition (2011) J. Appl. Ecol., 48, pp. 1472-1479;
Bagavathiannan, M.V., Norsworthy, J.K., Smith, K.L., Neve, P., Modeling the simultaneous evolution of resistance to ALS- and ACCase-inhibiting herbicides in barnyardgrass (Echinochloa crus-galli) in Clearfield® rice (2014) Weed Technol., 28, pp. 89-103;
Bankhead, S.B., Landa, B.B., Lutton, E., Weller, D.M., Gardener, B.B.M., Minimal changes in rhizobacterial population structure following root colonization by wild type and transgenic biocontrol strains (2004) FEMS Microbiol. Ecol., 49, pp. 307-318;
Baumgarte, S., Tebbe, C.C., Field studies on the environmental fate of the Cry1Ab Bt -toxin produced by transgenic maize (MON810) and its effect on bacterial communities in the maize rhizosphere (2005) Mol. Ecol., 14, pp. 2539-2551;
Beckie, H.J., Harker, K.N., Hall, L.M., Warwick, S.I., Legere, A., Sikkema, P.H., Clayton, G.W., Simard, M.J., A decade of herbicide-resistant crops in Canada (2006) Can. J. Plant Sci., 86, pp. 1243-1264;
Begg, G.S., Hockaday, S., McNicol, J.W., Askew, M., Squire, G.R., Modelling the persistence of volunteer oilseed rape (Brassica napus) (2006) Ecol. Modell., 198, pp. 195-207;
Behnke, K., Grote, R., Bruggemann, N., Zimmer, I., Zhou, G.W., Elobeid, M., Janz, D., Schnitzler, J.P., Isoprene emission-free poplars-a chance to reduce the impact from poplar plantations on the atmosphere (2012) New Phyt., 194, pp. 70-82;
Beltran, R.S., Kreidler, N., Van Vuren, D.H., Morrison, S.A., Zavaleta, E.S., Newton, K., TershyB, R., Croll, D.A., Passive recovery of vegetation after herbivore eradication on Santa Cruz Island, California (2014) Restor. Ecol., 22, pp. 790-797;
Benbrook, C.M., Impacts of genetically engineered crops on pesticide use in the US-the first sixteen years (2012) Environ. Sci. Eur., 24, p. 24;
Benedict, M., Eckerstorfer, M., Franz, G., Gaugitsch, H., Greiter, A., Heissenberger, A., Knols, B., Rabitsch, W., Defining environmental risk assessment criteria for genetically modified insects to be placed on the EU Market (2010), European Food Safety Authority; ParmaBirch, A.N.E., Griffiths, B.S., Caul, S., Thompson, J., Heckmann, L.H., Krogh, P.H., Cortet, J., The role of laboratory, glasshouse and field scale experiments in understanding the interactions between genetically modified crops and soil ecosystems: a review of the ECOGEN project (2007) Pedobiologia, 51, pp. 251-260;
Blackwood, C.B., Buyer, J.S., Soil microbial communities associated with Bt and non-Bt corn in three soils (2004) J. Environ. Qual., 33, pp. 832-836;
Bleck, G.T., White, B.R., Miller, D.J., Wheeler, M.B., Production of bovine alpha-lactalbumin in the milk of transgenic pigs (1998) J. Anim. Sci., 76, pp. 3072-3078;
Boete, C., Agusto, F.B., Reeves, R.G., Impact of mating behaviour on the success of malaria control through a single inundative release of transgenic mosquitoes (2014) J. Theor. Biol., 347, pp. 33-43;
Bosworth, A.H., Williams, M.K., Albrecht, K.A., Kwiatkowski, R., Beynon, J., Hankinson, T.R., Ronson, C.W., Triplett, E.W., Alfalfa yield response to inoculation with recombinant strains of Rhizobium meliloti with an extra copy of dctABD and/or modified nifA expression (1994) Appl. Environ. Microbiol., 60, pp. 3815-3832;
Brookes, G., Barfoot, P., Global impact of biotech crops: environmental effects, 1996-2008 (2010) AgBioForum, 13, pp. 76-94;
Brophy, B., Smolenski, G., Wheeler, T., Wells, D., L'Huillier, P., Laible, G., Cloned transgenic cattle produce milk with higher levels of beta-casein and kappa-casein (2003) Nat. Biotechnol., 21, pp. 157-161;
Butler, T.M., Fletcher, G.L., Promoter analysis of a growth hormone transgene in Atlantic salmon (2009) Theriogenology, 72, pp. 62-71;
Chambers, C.P., Whiles, M.R., Rosi-Marshall, E.J., Tank, J.L., Royer, T.V., Griffiths, N.A., Evans-White, M.A., Stojak, A.R., Responses of stream macroinvertebrates to Bt maize leaf detritus (2010) Ecol. Appl., 20, pp. 1949-1960;
Cheeke, T.E., Effects of the cultivation of genetically modified Bt crops on nontarget soil organisms (2012) Microbial Ecology in Sustainable Agroecosystems, pp. 153-227. , Boca Raton, CRC Press, T.E. Cheeke, D.C. Coleman, D.H. Wall (Eds.);
Cheeke, T.E., Cruzan, M.B., Rosenstiel, T.N., A field evaluation of arbuscular mycorrhizal fungal colonization in Bacillus thuringiensis toxin-expressing (Bt) and Non- Bt Maize (2013) Appl. Environ. Microbiol., 79, pp. 4078-4086;
Cheeke, T.E., Darby, H., Bever, J.D., Rosenstiel, T.N., Cruzan, M.B., Effect of Bt maize cultivation history on arbuscular mycorrhizal fungal colonization, spore abundance and diversity, and plant growth (2014) Agric. Ecosyst. Environ., 195, pp. 29-35;
Cheeke, T.E., Pace, B.A., Rosenstiel, T.N., Cruzan, M.B., The influence of fertilizer level and spore density on arbuscular mycorrhizal colonization of transgenic Bt 11 maize (Zea mays) in experimental microcosms (2011) FEMS Microbiol. Ecol., 75, pp. 304-312;
Cheeke, T.E., Rosenstiel, T.N., Cruzan, M.B., Evidence of reduced arbuscular mycorrhizal fungal colonization in multiple lines of Bt maize (2012) Am. J. Bot., 99, pp. 700-707;
Chen, D.H., Ye, G.Y., Yang, C.Q., Chen, Y., Wu, Y.K., Effect of introducing Bacillus thuringiensis gene on nitrogen metabolism in cotton (2005) Field Crop. Res., 92 (1), pp. 1-9;
Chen, W.Y., Wight, D.C., Wagner, T.E., Kopchick, J.J., Expression of a mutated bovine growth hormone gene suppresses growth of transgenic mice (1990) Proc. Natl. Acad. Sci. U. S. A., 87, pp. 5061-5065;
Clements, J.E., Wall, R.J., Narayan, O., Hauer, D., Schoborg, R., Sheffer, D., Powell, A., Rexroad, C.E., Development of transgenic sheep that express the visna virus envelope gene (1994) Virology, 200, pp. 370-380;
Constanzo, A., Barberi, P., Functional agrobiodiversity and agroecosystem services in sustainable wheat production. A review (2014) Agron. Sustain. Dev., 34, pp. 327-348;
Conner, A.J., Glare, T.R., Nap, J.P., The release of genetically modified crops into the environment-part II: overview of ecological risk assessment (2003) Plant J., 33, pp. 19-46;
D'Hertefeldt, T., Jørgensen, R.B., Pettersson, L.B., Long-term persistence of GM oilseed rape in the seedbank (2008) Biol. Lett., 4, pp. 314-317;
Damak, S., Su, H., Jay, N.P., Bullock, D.W., Su, H.Y., Improved wool production in transgenic sheep expressing insulin-like growth factor 1 (1996) Biotechnology, 14, pp. 185-188;
de Bello, F., Lavorel, S., Diaz, S., Harrington, R., Cornelissen, J.H.C., Bardgett, R.D., Berg, M.P., Harrison, P.A., Towards an assessment of multiple ecosystem processes and services via functional traits (2010) Biodivers. Conserv., 19, pp. 2873-2893;
de Vaufleury, A., Kramarz, P.E., Binet, P., Cortet, J., Caul, S., Andersen, M.N., Plumey, E., Krogh, P.H., Exposure and effects assessments of Bt -maize on non-target organisms (gastropods, microarthropods, mycorrhizal fungi) in microcosms (2007) Pedobiologia, 51, pp. 185-194;
Denning, C., Burl, S., Ainslie, A., Bracken, J., Dinnyes, A., Fletcher, J., King, T., de Sousa, P., Deletion of the alpha(1,3) galactosyl transferase (GGTA1) gene and the prion protein (PrP) gene in sheep (2001) Nat. Biotechnol., 19, pp. 559-562;
deRuyter, P., Kuipers, O.P., Meijer, W.C., deVos, W.M., Food-grade controlled lysis of Lactococcus lactis for accelerated cheese ripening (1997) Nat. Biotechnol., 15, pp. 976-979;
Devlin, R.H., Biagi, C.A., Yesaki, T.Y., Smailus, D.E., Byatt, J.C., Growth of domesticated transgenic fish (2001) Nature, 409, pp. 781-782;
Devos, Y., De Schrijver, A., De Clercq, P., Kiss, J., Romeis, J., Bt-maize event MON 88017 expressing Cry3Bb1 does not cause harm to non-target organisms (2012) Transgenic Res., 21, pp. 1191-1214;
Dohrmann, A.B., Kuting, M., Junemann, S., Jaenicke, S., Schluter, A., Tebbe, C.C., Importance of rare taxa for bacterial diversity in the rhizosphere of Bt - and conventional maize varieties (2013) ISME J., 7, pp. 37-49;
Downing, K.J., Leslie, G., Thomson, J.A., Biocontrol of the sugarcane borer Eldana saccharina by expression of the Bacillus thuringiensis cry1Ac7 and Serratia marcescens chiA genes in sugarcane-associated bacteria (2000) Appl. Environ. Microbiol., 66, pp. 2804-2810;
Drahos, D.J., Hemming, B.C., Mcpherson, S., Tracking recombinant organisms in the environment-beta-galactosidase as a selectable non-antibiotic marker for fluorescent Pseudomonas (1986) Biotechnology, 4, pp. 439-444;
Du, S.J., Gong, Z., Fletcher, G.L., Shears, M.A., King, M.J., Idler, D.R., Hew, C.L., Growth enhancement in transgenic Atlantic salmon by the use of an all fish chimeric growth hormone gene construct (1992) Nat. Biotechnol., 10, pp. 176-181;
Duan, J.J., Lundgren, J.G., Naranjo, S., Marvier, M., Extrapolating non-target risk of Bt crops from laboratory to field (2010) Biol. Lett., 6, pp. 74-77;
Duc, C., Nentwig, W., Lindfeld, A., No adverse effect of genetically modified antifungal wheat on decomposition dynamics and the soil fauna community-a field study (2011) PLoS One, 6, p. e25014. , doi:25010.21371/journal.pone.0025014;
Dunfield, K.E., Germida, J.J., Seasonal changes in the rhizosphere microbial communities associated with field-grown genetically modified canola (Brassica napus) (2003) Appl. Environ. Microbiol., 69, pp. 7310-7318;
Dunham, R.A., Warr, G.W., Nichols, A., Duncan, P.L., Argue, B., Middleton, D., Kucuktas, H., Enhanced bacterial disease resistance of transgenic channel catfish Ictalurus punctatus possessing cecropin genes (2002) Mar. Biotechnol., 4, pp. 338-344;
Edgerton, M.D., Increasing crop productivity to meet global needs for feed, food, and fuel (2009) Plant Physiol., 149, pp. 7-13;
Ellstrand, N.C., Current knowledge of gene flow in plants: implications for transgene flow (2003) Philo. Trans. R Soc. Lond. Ser. B Biol. Sci., 358, pp. 1163-1170;
Ellstrand, N.C., Meirmans, P., Rong, J., Bartsch, D., Ghosh, A., de Jong, T.J., Haccou, P., Hooftman, D., Introgression of crop alleles into wild or weedy populations (2013) Annu. Rev. Ecol. Evol. Systematics, 44, pp. 325-345;
http://ec.europa.eu/food/dyna/gm_register/gm_register_auth.cfm?pr_id=18, Accessed October 6th 2014EU Register of authorised GMOs (2014), http://ec.europa.eu/food/dyna/gm_register/gm_register_auth.cfm?pr_id=19, Accessed October 6th 2014Fang, H., Dong, B., Yan, H., Tang, F.F., Wang, B.C., Yu, Y.L., Effect of vegetation of transgenic Bt rice lines and their straw amendment on soil enzymes, respiration, functional diversity and community structure of soil microorganisms under field conditions (2012) J. Environ. Sci., 24, p. 1259;
Fletcher, G.L., Shears, M.A., Yaskowiak, E.S., King, M.J., Goddard, S.V., Gene transfer: potential to enhance the genome of Atlantic salmon for aquaculture (2004) Aust. J. Exp. Agric., 44, pp. 1095-1100;
Enviropig or FrankenSwine? Why genetically modifying pigs could cause a load of Manure (2010), http://documents.foodandwaterwatch.org/doc/Enviropig.pdf#_ga=1.175912866.181127406.1412596696, Fact sheet, June 2010. Accessed October 6th 2014Forabosco, F., Lohmus, M., Rydhmer, L., Sundström, L.F., Genetically modified farm animals and fish in agriculture: a review (2013) Livest. Sci., 153, pp. 1-9;
Forsberg, C.W., Meidinger, R.G., Phillips, J.P., (2009) Developments on the EnviropigTM file 28th Centralia Swine Research Update, , http://www.centraliaswineresearch.ca/proconline.html;
Franchi, E., Tosi, C., Scolla, G., Della Penna, G., Rodriguez, F., Pedroni, P.M., Metabolically engineered Rhodobacter sphaeroides RV strains for improved biohydrogen photoproduction combined with disposal of food wastes (2004) Mar. Biotechnol., 6, pp. 552-565;
Freedman, B., Catling, P.M., Lucas, Z., Effects of feral horses on vegetation of Sable Island, Nova Scotia (2011) Can. Field-Nat., 125, pp. 200-212;
Gassmann, A.J., Petzold-Maxwell, J.L., Clifton, E.H., Dunbar, M.W., Hoffmann, A.M., Ingber, D.A., Keweshan, R.S., Field-evolved resistance by western corn rootworm to multiple Bacillus thuringiensis toxins in transgenic maize (2014) Proc. Natl. Acad. Sci. U. S. A., 111, pp. 5141-5146;
Gilbert, N., A hard look at GM crops (2013) Nature, 497, pp. 24-26;
Gliddon, C., The impacts of hybrids between genetically modified crop plants and their related species-biological models and their perspectives (1994) Mol. Ecol., 3, pp. 41-44;
Golovan, S.P., Meidinger, R.G., Ajakaiye, A., Cottrill, M., Wiederkehr, M.Z., Barney, D.J., Plante, C., Forsberg, C.W., Pigs expressing salivary phytase produce low-phosphorus manure (2001) Nat. Biotechnol., 19, p. 741;
Griffiths, B.S., Caul, S., Thompson, J., Birch, A.N.E., Cortet, J., Andersen, M.N., Krogh, P.H., Microbial and microfaunal community structure in cropping systems with genetically modified plants (2007) Pedobiologia, 51, pp. 195-206;
Grime, J.P., Benefits of plant diversity to ecosystems: immediate, filter and founder effects (1998) J. Ecol., 86, pp. 902-910;
Haegele, J.W., Below, F.E., Transgenic corn rootworm protection increases grain yield and nitrogen use of maize (2013) Crop Sci., 53, pp. 585-594;
Haney, R.L., Senseman, S.A., Hons, F.M., Effect of roundup ultra on microbial activity and biomass from selected soils (2002) J. Environ. Qual., 31, pp. 730-735;
Hannula, S.E., de Boer, W., van Veen, J., A 3-year study reveals that plant growth stage, season and field site affect soil fungal communities while cultivar and GM-trait have minor effects (2012) PLoS One, 7, p. e33819. , 33810.31371/journal.pone.0033819;
Harker, K.N., O'Donovan, J.T., Blackshaw, R.E., Beckie, H.J., Mallory-Smith, C., Maxwell, B.D., Our view (2012) Weed Sci., 60, pp. 143-144;
Haro, M.A., de Lorenzo, V., Metabolic engineering of bacteria for environmental applications: construction of Pseudomonas strains for biodegradation of 2-chlorotoluene (2001) J. Biotechnol., 85, pp. 103-113;
Hawes, C., Haughton, A.J., Osborne, J.L., Roy, D.B., Clark, S.J., Perry, J.N., Rothery, P., Squire, G.R., Responses of plants and invertebrate trophic groups to contrasting herbicide regimes in the Farm Scale Evaluations of genetically modified herbicide tolerant crops (2003) Philo. Trans. R. Soc. Lond. Ser. B Biol. Sci., 358, pp. 1899-1913;
Heap, I., The international survey of herbicide resistant weeds (2014), http://www.weedscience.com, Accessed October 6th 2014Hegarty, R.S., Reducing rumen methane emissions through elimination of rumen protozoa (1999) Aust. J. Agric. Res., 50, pp. 1321-1327;
Herrero, O., Ramon, D., Orejas, M., Engineering the Saccharomyces cerevisiae isoprenoid pathway for de novo production of aromatic monoterpenes in wine (2008) Metab. Eng., 10, pp. 78-86;
Hew, C., Poon, R., Xiong, F., Gauthier, S., Shears, M., King, M., Davies, P., Fletcher, G., Liver-specific and seasonal expression of transgenic Atlantic salmon harboring the winter flounder antifreeze protein gene (1999) Transgenic Res., 8, pp. 405-414;
Hook, S.E., Wright, A.D.G., McBride, B.W., Methanogens: methane producers of the rumen and mitigation strategies (2010), ArchaeaIcoz, I., Stotzky, G., Fate and effects of insect-resistant Bt crops in soil ecosystems (2008) Soil Biol. Biochem., 40, pp. 559-586;
Itakura, M., Uchida, Y., Akiyama, H., Hoshino, Y.T., Shimomura, Y., Morimoto, S., Tago, K., Minamisawa, K., Mitigation of nitrous oxide emissions from soils by Bradyrhizobium japonicum inoculation (2013) Nat. Clim. Change, 3, pp. 208-212;
Joutsjoki, V., Luoma, S., Tamminen, M., Kilpi, M., Johansen, E., Palva, A., Recombinant Lactococcus starters as a potential source of additional peptidolytic activity in cheese ripening (2002) J. Appl. Microbiol., 92, pp. 1159-1166;
Kawata, M., Murakami, K., Ishikawa, T., Dispersal and persistence of genetically modified oilseed rape around Japanese harbors (2009) Environ. Sci. Pollut. Res., 16, pp. 120-126;
Kerovuo, J., Tynkkynen, S., Expression of Bacillus subtilis phytase in Lactobacillus plantarum 755 (2000) Lett. Appl. Microbiol., 30, pp. 325-329;
Konishi, K., Yonai, M., Kaneyama, K., Ito, S., Matsuda, H., Yoshioka, H., Nagai, T., Imai, K., Relationships of survival time, productivity and cause of death with telomere lengths of cows produced by somatic cell nuclear transfer (2011) J. Reprod. Dev., 57, pp. 572-578;
Lachnicht, S.L., Hendrix, P.F., Potter, R.L., Coleman, D.C., Crossley, D.A., Winter decomposition of transgenic cotton residue in conventional till and no-till systems (2004) Appl. Soil Ecol., 27, pp. 135-142;
Lai, L., Kang, J.X., Li, R., Wang, J., Witt, W.T., Yong, H.Y., Hao, Y., Dai, Y., Generation of cloned transgenic pigs rich in omega-3 fatty acids (2006) Nat. Biotechnol., 24, pp. 435-436;
Lau, W., Fischbach, M.A., Osbourn, A., Sattely, E.S., Key applications of plant metabolic engineering (2014) PLoS Biol, 12. , e1001879, doi: 1001810.1001371/journal.pbio.1001879;
Légère, A., Simard, M.J., Johnson, E., Stevenson, F.C., Beckie, H., Blackshaw, R.E., Control of volunteer canola with herbicides: effects of plant growth stage and cold acclimation (2006) Weed Technol., 20, pp. 485-493;
Li, L., Pitcher, T.J., Devlin, R.H., Potential risks of trophic impacts by escaped transgenic salmon in marine environments (2015) Environ. Conserv., 42, pp. 152-161;
Li, X.G., Liu, B.A., Cui, J.J., Liu, D.D., Ding, S.A., Gilna, B., Luo, J.Y., Han, Z.M., No evidence of persistent effects of continuously planted transgenic insect-resistant cotton on soil microorganisms (2011) Plant Soil, 339, pp. 247-257;
Lilley, A.K., Bailey, M.J., The acquisition of indigenous plasmids by a genetically marked pseudomonad population colonizing the sugar beet phytosphere is related to local environmental conditions (1997) Appl. Environ. Microbiol., 63, pp. 1577-1583;
Lilley, A.K., Bailey, M.J., Barr, M., Kilshaw, K., Timms-Wilson, T.M., Day, M.J., Norris, S.J., Godfray, H.C.J., Population dynamics and gene transfer in genetically modified bacteria in a model microcosm (2003) Mol. Ecol., 12, pp. 3097-3107;
Liu, J., Yan, G., Shu, C., Zhao, C., Liu, C., Song, F., Zhou, L., Huang, D., Construction of a Bacillus thuringiensis engineered strain with high toxicity and broad pesticidal spectrum against coleopteran insects (2010) Appl. Microbiol. Biotechnol., 87, pp. 243-249;
Liu, W., Lu, H.H., Wu, W., Wei, Q.K., Chen, Y.X., Thies, J.E., Transgenic Bt rice does not affect enzyme activities and microbial composition in the rhizosphere during crop development (2008) Soil Biol. Biochem., 40, pp. 475-486;
Lo, D., Pursel, V., Linton, P.J., Sandgren, E., Behringer, R., Rexroad, C., Palmiter, R.D., Brinster, R.L., Expression of mouse IgA by transgenic mice, pigs and sheep (1991) Eur. J. Immunol., 21, pp. 1001-1006;
Londo, J.P., Bollman, M.A., Sagers, C.L., Lee, E.H., Watrud, L.S., Changes in fitness-associated traits due to the stacking of transgenic glyphosate resistance and insect resistance in Brassica napus L (2011) Heredity, 107, pp. 328-337;
Londo, J.P., Bollman, M.A., Sagers, C.L., Lee, E.H., Watrud, L.S., Glyphosate-drift but not herbivory alters the rate of transgene flow from single and stacked trait transgenic canola (Brassica napus) to nontransgenic B. napusandB. rapa (2011) New Phyt., 191, pp. 840-849;
Londoño-R, L.M., Tarkalson, D., Thies, J.E., In field rates of decomposition and microbial communities colonizing residues vary by depth of residue placement and plant part, but not by crop genotype for residues from two Cry1Ab Bt corn hybrids and their non-transgenic isolines (2013) Soil Biol. Biochem., 57, pp. 349-355;
Lu, H.H., Wu, W.X., Chen, Y.X., Zhang, X.J., Devare, M., Thies, J.E., Decomposition of Bt transgenic rice residues and response of soil microbial community in rapeseed-rice cropping system (2010) Plant Soil, 336, pp. 279-290;
Lu, Y.H., Wu, K.M., Jiang, Y.Y., Xia, B., Li, P., Feng, H.Q., Wyckhuys, K.A.G., Guo, Y.Y., Mirid bug outbreaks in multiple crops correlated with wide scale adoption of Bt cotton in China (2010) Science, 328, pp. 1151-1154;
Lupwayi, N.Z., Hanson, K.G., Harker, K.N., Clayton, G.W., Blackshaw, R.E., O'Donovan, J.T., Johnson, E.N., Monreal, M.A., Soil microbial biomass, functional diversity and enzyme activity in glyphosate-resistant wheat-canola rotations under low-disturbance direct seeding and conventional tillage (2007) Soil Biol. Biochem., 39, pp. 1418-1427;
Lyall, J., Irvine, R.M., Sherman, A., McKinley, T.J., Nunez, A., Purdie, A., Outtrim, L., Tiley, L., Suppression of avian influenza transmission in genetically modified chickens (2011) Science, 331, pp. 223-226;
Marshall, J.M., The cartagena protocol and genetically modified mosquitoes (2010) Nat. Biotechnol., 28, pp. 896-897;
Marvier, M., Using meta-analysis to inform risk assessment and risk management (2011) J. Consum. Prot. Food Saf., 6, pp. 113-118;
Medeiros, E., Phelps, M., Fuentes, F., Bradley, T., Overexpression of follistatin in trout stimulates increased muscling (2009) Am. J. Physiol. Regul. Integr. Comp. Physiol., 297, pp. R235-R242;
(2014), http://www.monsanto.com/products/pages/refuge.aspx, Accessed October 6th 2014(2014), http://www.monsanto.com/products/pages/refuge-in-the-bag-corn-products.aspx, Accessed October 6th 2014Mortensen, D.A., Egan, J.F., Maxwell, B.D., Ryan, M.R., Smith, R.G., Navigating a critical juncture for sustainable weed management (2012) Bioscience, 62, pp. 75-84;
Motavalli, P.P., Kremer, R.J., Fang, M., Means, N.E., Impact of genetically modified crops and their management on soil microbially mediated plant nutrient ransformations (2004) J. Environ. Qual., 33, pp. 816-824;
Mozdziak, P.E., Pophal, S., Borwornpinyo, S., Petitte, J.N., Transgenic chickens expressing beta-galactosidase hydrolyze lactose in the intestine (2003) J. Nutr., 133, pp. 3076-3079;
Mueller, N.D., Gerber, J.S., Johnston, M., Ray, D.K., Ramankutty, N., Foley, J.A., Closing yield gaps through nutrient and water management (2012) Nature, 490, pp. 254-257;
Mungai, N.W., Motavalli, P.P., Nelson, K.A., Kremer, R.J., Differences in yields, residue composition and N mineralization dynamics of Bt and non- Bt maize (2005) Nutr. Cycl. Agroecosyst., 73, pp. 101-109;
Naik, G., Qaim, M., Subramanian, A., Zilberman, D., Bt cotton controversy: some paradoxes explained (2005) Econ. Polit. Wkly., 40, pp. 1514-1517;
Nam, Y.K., Maclean, N., Hwang, G., Kim, D.S., Autotransgenic and allotransgenic manipulation of growth traits in fish for aquaculture: a review (2008) J. Fish Biol., 72 (1), pp. 1-26;
Naranjo, S.E., Impacts of Bt transgenic cotton on integrated pest management (2011) J. Agric. Food Chem., 59, pp. 5842-5851;
Nottle, M.B., Nagashima, H., Verma, P.J., Du, Z.T., Grupen, C.G., McIlfatrick, S.M., Ashman, R.J., Robins, A.J., Production and analysis of transgenic pigs containing a metallothionein porcine growth hormone gene construct (1999) Transgenic Animals in Agriculture, pp. 145-156. , CABI, Wallingford, J.D. Murray, G.B. Anderson, A.M. Oberbauer, M.M. McGloughlin (Eds.);
Oh, Y.K., Raj, S.M., Jung, G.Y., Park, S., Current status of the metabolic engineering of microorganisms for biohydrogen production (2011) Bioresour. Technol., 102, pp. 8357-8367;
Philippot, L., Hallin, S., Towards food, feed and energy crops mitigating climate change (2011) Trends Plant Sci., 16, pp. 476-480;
Philippot, L., Kuffner, M., Cheneby, D., Depret, G., Laguerre, G., Martin-Laurent, F., Genetic structure and activity of the nitrate-reducers community in the rhizosphere of different cultivars of maize (2006) Plant Soil, 287, pp. 177-186;
Phillips, J.P., Golovan, S.P., Meidinger, R.G., Forsberg, C.W., Transgenic enhancement of nutrient cycling: moving toward an environmentally sustainable animal agriculture, Proceedings of the 8th World Congress on Genetics Applied to Livestock Production, Belo Horizonte, Minas Gerais, Brazil, 13-18 August, 2006 (2006), pp. 19-20. , Instituto Prociencia, Minas GeraisPleasants, J.M., Oberhauser, K.S., Milkweed loss in agricultural fields because of herbicide use: effect on the monarch butterfly population (2013) Insect Conserv. Divers., 6, pp. 135-144;
Pursel, V.G., Sutrave, P., Wall, R.J., Kelly, A.M., Hughes, S.H., Transfer of C-Ski gene into swine to enhance muscle development (1992) Theriogenology, 37, p. 278;
Ramsay, G., Thompson, C., Squire, G., Quantifying landscape-scale gene flow in oilseed rape (2003), Department for Environment, Food and Rural Affairs; LondonRanathunge, K., El-Kereamy, A., Gidda, S., Bi, Y.M., Rothstein, S.J., AMT11 transgenic rice plants with enhanced NH<inf>4</inf> permeability show superior growth and higher yield under optimal and suboptimal NH<inf>4</inf> conditions (2014) J. Exp. Bot., 65, pp. 965-979;
Ray, D.K., Ramankutty, N., Mueller, N.D., West, P.C., Foley, J.A., Recent patterns of crop yield growth and stagnation (2012), 3, p. 1293. , Nat. Commun, doi: 1210.1038/ncomms2296Reeves, R.G., Denton, J.A., Santucci, F., Bryk, J., Reed, F.A., Scientific standards and the regulation of genetically modified insects (2012) PLoS Negl. Trop. Dis, 6, p. e1502. , doi: 1510.1371/journal.pntd.0001502;
Reh, W.A., Maga, E.A., Collette, N.M., Moyer, A., Conrad-Brink, J.S., Taylor, S.J., DePeters, E.J., Murray, J.D., Hot topic: using a stearoyl-CoA desaturase transgene to alter milk fatty acid composition (2004) J. Dairy Sci., 87, pp. 3510-3514;
Richardson, D., Felgate, H., Watmough, N., Thomson, A., Baggs, E., Mitigating release of the potent greenhouse gas N<inf>2</inf>O from the nitrogen cycle-could enzymic regulation hold the key? (2009) Trends Biotechnol., 27, pp. 388-397;
Richt, J.A., Kasinathan, P., Hamir, A.N., Castilla, J., Sathiyaseelan, T., Vargas, F., Sathiyaseelan, J., Kuroiwa, Y., Production of cattle lacking prion protein (2007) Nat. Biotechnol., 25, pp. 132-138;
Ripp, S., Nivens, D.E., Ahn, Y., Werner, C., Jarrell, J., Easter, J.P., Cox, C.D., Sayler, G.S., Controlled field release of a bioluminescent genetically engineered microorganism for bioremediation process monitoring and control (2000) Environ. Sci. Technol., 34, pp. 846-853;
Ross, E.M., Moate, P.J., Marett, L., Cocks, B.G., Hayes, B.J., Investigating the effect of two methane-mitigating diets on the rumen microbiome using massively parallel sequencing (2013) J. Dairy Sci., 96. , 1-17;
Saeki, K., Matsumoto, K., Kinoshita, M., Suzuki, I., Tasaka, Y., Kano, K., Taguchi, Y., Iritani, A., Functional expression of a Delta12 fatty acid desaturase gene from spinach in transgenic pigs (2004) Proc. Natl. Acad. Sci. U. S. A, 101, pp. 6361-6366;
Salter, D.W., Crittenden, L.B., Artificial insertion of a dominant gene for resistance to avian leukosis virus into the germ line of the chicken (1989) Theor. Appl. Genet., 77. , 457-461;
Sarkar, B., Patra, A.K., Purakayastha, T.J., Transgenic Bt -cotton affects enzyme activity and nutrient availability in a sub-tropical inceptisol (2008) J. Agron. Crop Sci., 194, pp. 289-296;
Schafer, M.G., Ross, A.A., Londo, J.P., Burdick, C.A., Lee, E.H., Travers, S.E., Van de Water, P.K., Sagers, C.L., The establishment of genetically engineered Canola populations in the US (2011) PLoS One, 6, p. e25736. , doi: 25710.21371/journal.pone.0025736;
Scharfen, E.C., Mills, D.A., Maga, E.A., Use of human lysozyme transgenic goat milk in cheese making: effects on lactic acid bacteria performance (2007) J. Dairy Sci., 90, pp. 4084-4091;
Schmalenberger, A., Tebbe, C.C., Genetic profiling of noncultivated bacteria from the rhizospheres of sugar beet (Beta vulgaris) reveal field and annual variability but no effect of a transgenic herbicide resistance (2003) Can. J. Microbiol., 49, pp. 1-8;
Schwartz, M.W., Brigham, C.A., Hoeksema, J.D., Lyons, K.G., Mills, M.H., van Mantgem, P.J., Linking biodiversity to ecosystem function: implications for conservation ecology (2000) Oecologia, 122, pp. 297-305;
Schwieger, F., Tebbe, C.C., Effect of field inoculation with Sinorhizobium meliloti L33 on the composition of bacterial communities in rhizospheres of a target plant (Medicago sativa) and a non-target plant (Chenopodium album)-linking of 16S rRNA gene-based single-strand conformation polymorphism community profiles to the diversity of cultivated bacteria (2000) Appl. Environ. Microbiol, 66, pp. 3556-3565;
Sessitsch, A., Gyamfi, S., Tscherko, D., Gerzabek, M.H., Kandeler, E., Activity of microorganisms in the rhizosphere of herbicide treated and untreated transgenic glufosinate-tolerant and wildtype oilseed rape grown in containment (2004) Plant Soil, 266, pp. 105-116;
Sester, M., Darmency, H., Colbach, N., Contribution of groundkeepers vs. weed beet to gene escape from sugar beet (Beta vulgaris spp.). Consequences for growing genetically-modified sugar beet-a modelling approach (2012) Field Crop. Res., 135, pp. 46-57;
Shen, R.F., Cai, H., Gong, W.H., Transgenic Bt cotton has no apparent effect on enzymatic activities or functional diversity of microbial communities in rhizosphere soil (2006) Plant Soil, 285, pp. 149-159;
Shi, G.M., Chavas, J.P., Lauer, J., Commercialized transgenic traits, maize productivity and yield risk (2013) Nat. Biotechnol., 31, pp. 111-114;
Shintani, M., Matsui, K., Inoue, J., Hosoyama, A., Ohji, S., Yamazoe, A., Nojiri, H., Ohkuma, M., Single-cell analyses revealed transfer ranges of IncP-1, IncP-7, and IncP-9 plasmids in a soil bacterial community (2014) Appl. Environ. Microbiol., 80, pp. 138-145;
Shu, Y.H., Ma, H.H., Du, Y., Li, Z.X., Feng, Y.J., Wang, J.W., The presence of Bacillus thuringiensis (Bt) protein in earthworms Eisenia fetida has no deleterious effects on their growth and reproduction (2011) Chemosphere, 85, pp. 1648-1656;
Skot, L., Harrison, S.P., Nath, A., Mytton, L.R., Clifford, B.C., Expression of insecticidal activity in Rhizobium containing the delta-endotoxin gene cloned from Bacillus thuringiensis subsp. tenebrionis (1990) Plant Soil, 127, pp. 285-295;
Squire, G.R., Breckling, B., Dietz, P., feilstetter, A., Jørgensen, R.B., Lecomte, J., Pivard, S., Young, M.W., Status of feral oilseed rape in Europe: its minor role as a GM impurity and its potential as a reservoir of transgene persistence (2011) Environ. Sci. Pollut. Res., 18, pp. 111-115;
Squire, G.R., Brooks, D.R., Bohan, D.A., Champion, G.T., Daniels, R.E., Haughton, A.J., Hawes, C., Firbank, L.G., On the rationale and interpretation of the farm scale evaluations of genetically modified herbicide-tolerant crops (2003) Philo. Trans. R. Soc. Lond. Ser. B Biol. Sci., 358, pp. 1779-1799;
Steinfeld, H., Gerber, P., Wassenaar, T., Castel, V., Rosales, M., de Haan, C., (2006) Livestock's long shadow, , United Nations Food and Agriculture Organization, Rome;
Subbarao, G.V., Ishikawa, T., Ito, O., Nakahara, K., Wang, H.Y., Berry, W.L., A biolumiuescence assay to detect nitrification inhibitors released from plant roots: a case study with Brachiaria humidicola (2006) Plant Soil, 288, pp. 101-112;
Subbarao, G.V., Nakahara, K., Hurtado, M.P., Ono, H., Moreta, D.E., Salcedo, A.F., Yoshihashi, A.T., Ito, O., Evidence for biological nitrification inhibition in Brachiaria pastures (2009) Proc. Natl. Acad. Sci. U. S. A., 106, pp. 17302-17307;
Subbarao, G.V., Tomohiro, B., Masahiro, K., Osamu, I., Samejima, H., Wang, H.Y., Pearse, S.J., Berry, W.L., Can biological nitrification inhibition (BNI) genes from perennial Leymus racemosus (Triticeae) combat nitrification in wheat farming? (2007) Plant Soil, 299, pp. 55-64;
Sundström, L.F., Lohmus, M., Devlin, R.H., Migration and growth potential of coho salmon smolts: implications for ecological impacts from growth-enhanced fish (2010) Ecol. Appl., 20, pp. 1372-1383;
Sutton, M.A., Oenema, O., Erisman, J.W., Leip, A., van Grinsven, H., Winiwarter, W., Too much of a good thing (2011) Nature, 472, pp. 159-161;
Swan, C.M., Jensen, P.D., Dively, G.P., Lamp, W.O., Processing of transgenic crop residues in stream ecosystems (2009) J. Appl. Ecol., 46, pp. 1304-1313;
Sybesma, W., van den Born, E., Starrenburg, M., Mierau, I., Kleerebezem, M., de Vos, W.M., Hugenholtz, J., Controlled modulation of folate polyglutamyl tail length by metabolic engineering of Lactococcus lactis (2003) Appl. Environ. Microbiol., 69, pp. 7101-7107;
Tabashnik, B.E., Brevault, T., Carriere, Y., Insect resistance to Bt crops: lessons from the first billion acres (2013) Nat. Biotechnol., 31, pp. 510-521;
Tabashnik, B.E., Sisterson, M.S., Ellsworth, P.C., Dennehy, T.J., Antilla, L., Liesner, L., Whitlow, M., Carriere, Y., Suppressing resistance to Bt cotton with sterile insect releases (2010) Nat. Biotechnol., 28, pp. 1304-1309;
Thomas, D.D., Donnelly, C.A., Wood, R.J., Alphey, L.S., Insect population control using a dominant, repressible, lethal genetic system (2000) Science, 287, pp. 2474-2476;
Timms-Wilson, T.M., Ellis, R.J., Renwick, A., Rhodes, D.J., Mavrodi, D.V., Weller, D.M., Thomashow, L.S., Bailey, M.J., Chromosomal insertion of phenazine-1-carboxylic acid biosynthetic pathway enhances efficacy of damping-off disease control by Pseudomonas fluorescens (2000) Mol. Plant Microbe Interact., 13, pp. 1293-1300;
Tong, J., Wei, H., Liu, X., Hu, W., Bi, M., Wang, Y., Li, Q., Li, N., Production of recombinant human lysozyme in the milk of transgenic pigs (2011) Transgenic Res., 20, pp. 417-419;
Udayasuriyan, V., Nakamura, A., Masaki, H., Uozumi, T., Transfer of an insecticidal protein gene of Bacillus thuringiensis into plant-colonizing Azospirillum (1995) World J. Microbiol. Biotechnol., 11, pp. 163-167;
Valls, M., Atrian, S., de Lorenzo, V., Fernandez, L.A., Engineering a mouse metallothionein on the cell surface of Ralstonia eutropha CH34 for immobilization of heavy metals in soil (2000) Nat. Biotechnol., 18, pp. 661-665;
van Dillewijn, P., Soto, M.J., Villadas, P.J., Toro, N., Construction and environmental release of a Sinorhizobium meliloti strain genetically modified to be more competitive for alfalfa nodulation (2001) Appl. Environ. Microbiol., 67, pp. 3860-3865;
van Dillewijn, P., Villadas, P.J., Toro, N., Effect of a Sinorhizobium meliloti strain with a modified putA gene on the rhizosphere microbial community of alfalfa (2002) Appl. Environ. Microbiol., 68, pp. 4201-4208;
Vauramo, S., Pasonen, H.L., Pappinen, A., Setala, H., Decomposition of leaf litter from chitinase transgenic silver birch (Betula pendula) and effects on decomposer populations in a field trial (2006) Appl. Soil Ecol., 32, pp. 338-349;
Verwaal, R., Wang, J., Meijnen, J.-P., Visser, H., Sandmann, G., van den Berg, J.A., van Ooyen, A.J.J., High-level production of beta-carotene in Saccharomyces cerevisiae by successive transformation with carotenogenic genes from Xanthophyllomyces dendrorhous (2007) Appl. Environ. Microbiol., 73, pp. 4342-4350;
Vicedo, B., Penalver, R., Asins, M.J., Lopez, M.M., Biological control of Agrobacterium tumefaciens, colonization, and pAgK48 transfer with Agrobacterium radiobacter K84 and the Tra-mutant K1060 (1993) Appl. Environ. Microbiol., 59, pp. 309-315;
Wall, R.J., Powell, A.M., Paape, M.J., Kerr, D.E., Bannerman, D.D., Pursel, V.G., Wells, K.D., Hawk, H.W., Genetically enhanced cows resist intramammary Staphylococcus aureus infection (2005) Nat. Biotechnol., 23, pp. 445-451;
Wan, S., Johnson, A.M., Altosaar, I., Expression of nitrous oxide reductase from Pseudomonas stutzeri in transgenic tobacco roots using the root-specific rolD promoter from Agrobacterium rhizogenes (2012) Ecol. Evol, 2, pp. 286-297;
Wang, C.X., Knill, E., Glick, B.R., Defago, G., Effect of transferring 1-aminocyclopropane-1-carboxylic acid (ACC) deaminase genes into Pseudomonas fluorescens strain CHA0 and its gacA derivative CHA96 on their growth-promoting and disease-suppressive capacities (2000) Can. J. Microbiol., 46, pp. 898-907;
Warwick, S.I., Legere, A., Simard, M.J., James, T., Do escaped transgenes persist in nature? The case of an herbicide resistance transgene in a weedy Brassica rapa population (2008) Mol. Ecol., 17, pp. 1387-1395;
Watrud, L.S., King, G., Londo, J.P., Colasanti, R., Smith, B.M., Waschmann, R.S., Lee, E.H., Changes in constructed Brassica communities treated with glyphosate drift (2011) Ecol. Appl., 21, pp. 525-538;
Weih, M., Trade-offs in plants and the prospects for breeding using modern biotechnology (2003) New Phyt., 158, pp. 7-9;
Weih, M., Didon, U.M.E., Rönnberg-Wästljung, A.C., Böjrkman, C., Integrated agricultural research and crop breeding: allelopathic weed control in cereals and long-term productivity in perennial bionmass crops (2008) Agric. Syst., 97, pp. 99-107;
Weih, M., Hoeber, S., Beyer, F.P.F., Traits to ecosystems: the ecological sustainability challenge when developing future energy crops (2014) Front. Energy Res., 2, p. 17;
Whitham, T.G., Bailey, J.K., Schweitzer, J.A., Shuster, S.M., Bangert, R.K., Leroy, C.J., Lonsdorf, E.V., Wooley, S.C., A framework for community and ecosystem genetics: from genes to ecosystems (2006) Nat. Rev. Genet., 7, pp. 510-523;
Wimmer, E.A., Applications of insect transgenesis (2003) Nat. Rev. Genet., 4, pp. 225-232;
Wu, X., Ouyang, H., Duan, B., Pang, D., Zhang, L., Yuan, T., Xue, L., Li, G.P., Production of cloned transgenic cow expressing omega-3 fatty acids (2012) Transgenic Res., 21, pp. 537-543;
Xu, Z., Hennessy, D.A., Sardana, K., Moschini, G., The realized yield effect of genetically engineered crops: US maize and soybean (2013) Crop Sci., 53, pp. 735-745;
Yang, B., Wang, J., Tang, B., Liu, Y., Guo, C., Yang, P., Yu, T., Li, N., Characterization of bioactive recombinant human lysozyme expressed in milk of cloned transgenic cattle (2011) PLoS One, 6, p. e17593;
Yanni, S.F., Whalen, J.K., Ma, B.L., Crop residue chemistry, decomposition rates, and CO<inf>2</inf> evolution in Bt and non- Bt corn agroecosystems in North America: a review (2010) Nutr. Cycl. Agroecosyst., 87, pp. 277-293;
Zapiola, M.L., Campbell, C.K., Butler, M.D., Mallory-Smith, C.A., Escape and establishment of transgenic glyphosate-resistant creeping bentgrass Agrostis stolonifera in Oregon, USA: a 4-year study (2008) J. Appl. Ecol., 45, pp. 486-494;
Zapiola, M.L., Mallory-Smith, C.A., Crossing the divide: gene flow produces intergeneric hybrid in feral transgenic creeping bentgrass population (2012) Mol. Ecol., 21, pp. 4672-4680;
Zeller, S.L., Kalinina, O., Brunner, S., Keller, B., Schmid, B., Transgene x environment interactions in genetically modified wheat (2010) PLoS One, 5. , e11405, doi: 11410.11371/journal.pone.0011405;
Zhang, H.N., Tian, W., Zhao, J., Jin, L., Yang, J., Liu, C.H., Yang, Y.H., Wu, Y.D., Diverse genetic basis of field-evolved resistance to Bt cotton in cotton bollworm from China (2012) Proc. Natl. Acad. Sci. U. S. A., 109, pp. 10275-10280;
Zhao, J.H., Ho, P., Azadi, H., Benefits of Bt cotton counterbalanced by secondary pests? Perceptions of ecological change in China (2011) Environ. Monit. Assess., 173, pp. 985-994;
Zilberman, D., Sexton, S.E., Marra, M., Fernandez-Cornejo, F., The economic impact of genetically engineered crops (2010) Choices Mag. Food Farm Resour., (2). , Issues 25
N1  - References: Alfred, J., Dangl, J.L., Kamoun, S., McCouch, S.R., New horizons for plant translational research (2014) PLoS Biol., 12, p. e1001880. , doi: 1001810.1001371/journal.pbio.1001880; 
Alston, J.M., Beddow, J.M., Pardey, P.G., Agricultural research, productivity, and food prices in the long run (2009) Science, 325, pp. 1209-1210;
Andronov, E.E., Petrova, S.N., Chizhevskaya, E.P., Korostik, E.V., Akhtemova, G.A., Pinaev, A.G., Influence of introducing the genetically modified strain Sinorhizobium meliloti ACH-5 on the structure of the soil microbial community (2009) Microbiology, 78, pp. 474-482;
Areal, F.J., Riesgo, L., Rodriguez-Cerezo, E., Economic and agronomic impact of commercialized GM crops: a meta-analysis (2013) J. Agric. Sci., 151, pp. 7-33;
Axelsson, E.P., Hjältén, J., LeRoy, C.J., Whitham, T.G., Julkunen-Tiitto, R., Wennström, A., Leaf litter from insect-resistant transgenic trees causes changes in aquatic insect community composition (2011) J. Appl. Ecol., 48, pp. 1472-1479;
Bagavathiannan, M.V., Norsworthy, J.K., Smith, K.L., Neve, P., Modeling the simultaneous evolution of resistance to ALS- and ACCase-inhibiting herbicides in barnyardgrass (Echinochloa crus-galli) in Clearfield® rice (2014) Weed Technol., 28, pp. 89-103;
Bankhead, S.B., Landa, B.B., Lutton, E., Weller, D.M., Gardener, B.B.M., Minimal changes in rhizobacterial population structure following root colonization by wild type and transgenic biocontrol strains (2004) FEMS Microbiol. Ecol., 49, pp. 307-318;
Baumgarte, S., Tebbe, C.C., Field studies on the environmental fate of the Cry1Ab Bt -toxin produced by transgenic maize (MON810) and its effect on bacterial communities in the maize rhizosphere (2005) Mol. Ecol., 14, pp. 2539-2551;
Beckie, H.J., Harker, K.N., Hall, L.M., Warwick, S.I., Legere, A., Sikkema, P.H., Clayton, G.W., Simard, M.J., A decade of herbicide-resistant crops in Canada (2006) Can. J. Plant Sci., 86, pp. 1243-1264;
Begg, G.S., Hockaday, S., McNicol, J.W., Askew, M., Squire, G.R., Modelling the persistence of volunteer oilseed rape (Brassica napus) (2006) Ecol. Modell., 198, pp. 195-207;
Behnke, K., Grote, R., Bruggemann, N., Zimmer, I., Zhou, G.W., Elobeid, M., Janz, D., Schnitzler, J.P., Isoprene emission-free poplars-a chance to reduce the impact from poplar plantations on the atmosphere (2012) New Phyt., 194, pp. 70-82;
Beltran, R.S., Kreidler, N., Van Vuren, D.H., Morrison, S.A., Zavaleta, E.S., Newton, K., TershyB, R., Croll, D.A., Passive recovery of vegetation after herbivore eradication on Santa Cruz Island, California (2014) Restor. Ecol., 22, pp. 790-797;
Benbrook, C.M., Impacts of genetically engineered crops on pesticide use in the US-the first sixteen years (2012) Environ. Sci. Eur., 24, p. 24;
Benedict, M., Eckerstorfer, M., Franz, G., Gaugitsch, H., Greiter, A., Heissenberger, A., Knols, B., Rabitsch, W., Defining environmental risk assessment criteria for genetically modified insects to be placed on the EU Market (2010), European Food Safety Authority; ParmaBirch, A.N.E., Griffiths, B.S., Caul, S., Thompson, J., Heckmann, L.H., Krogh, P.H., Cortet, J., The role of laboratory, glasshouse and field scale experiments in understanding the interactions between genetically modified crops and soil ecosystems: a review of the ECOGEN project (2007) Pedobiologia, 51, pp. 251-260;
Blackwood, C.B., Buyer, J.S., Soil microbial communities associated with Bt and non-Bt corn in three soils (2004) J. Environ. Qual., 33, pp. 832-836;
Bleck, G.T., White, B.R., Miller, D.J., Wheeler, M.B., Production of bovine alpha-lactalbumin in the milk of transgenic pigs (1998) J. Anim. Sci., 76, pp. 3072-3078;
Boete, C., Agusto, F.B., Reeves, R.G., Impact of mating behaviour on the success of malaria control through a single inundative release of transgenic mosquitoes (2014) J. Theor. Biol., 347, pp. 33-43;
Bosworth, A.H., Williams, M.K., Albrecht, K.A., Kwiatkowski, R., Beynon, J., Hankinson, T.R., Ronson, C.W., Triplett, E.W., Alfalfa yield response to inoculation with recombinant strains of Rhizobium meliloti with an extra copy of dctABD and/or modified nifA expression (1994) Appl. Environ. Microbiol., 60, pp. 3815-3832;
Brookes, G., Barfoot, P., Global impact of biotech crops: environmental effects, 1996-2008 (2010) AgBioForum, 13, pp. 76-94;
Brophy, B., Smolenski, G., Wheeler, T., Wells, D., L'Huillier, P., Laible, G., Cloned transgenic cattle produce milk with higher levels of beta-casein and kappa-casein (2003) Nat. Biotechnol., 21, pp. 157-161;
Butler, T.M., Fletcher, G.L., Promoter analysis of a growth hormone transgene in Atlantic salmon (2009) Theriogenology, 72, pp. 62-71;
Chambers, C.P., Whiles, M.R., Rosi-Marshall, E.J., Tank, J.L., Royer, T.V., Griffiths, N.A., Evans-White, M.A., Stojak, A.R., Responses of stream macroinvertebrates to Bt maize leaf detritus (2010) Ecol. Appl., 20, pp. 1949-1960;
Cheeke, T.E., Effects of the cultivation of genetically modified Bt crops on nontarget soil organisms (2012) Microbial Ecology in Sustainable Agroecosystems, pp. 153-227. , Boca Raton, CRC Press, T.E. Cheeke, D.C. Coleman, D.H. Wall (Eds.);
Cheeke, T.E., Cruzan, M.B., Rosenstiel, T.N., A field evaluation of arbuscular mycorrhizal fungal colonization in Bacillus thuringiensis toxin-expressing (Bt) and Non- Bt Maize (2013) Appl. Environ. Microbiol., 79, pp. 4078-4086;
Cheeke, T.E., Darby, H., Bever, J.D., Rosenstiel, T.N., Cruzan, M.B., Effect of Bt maize cultivation history on arbuscular mycorrhizal fungal colonization, spore abundance and diversity, and plant growth (2014) Agric. Ecosyst. Environ., 195, pp. 29-35;
Cheeke, T.E., Pace, B.A., Rosenstiel, T.N., Cruzan, M.B., The influence of fertilizer level and spore density on arbuscular mycorrhizal colonization of transgenic Bt 11 maize (Zea mays) in experimental microcosms (2011) FEMS Microbiol. Ecol., 75, pp. 304-312;
Cheeke, T.E., Rosenstiel, T.N., Cruzan, M.B., Evidence of reduced arbuscular mycorrhizal fungal colonization in multiple lines of Bt maize (2012) Am. J. Bot., 99, pp. 700-707;
Chen, D.H., Ye, G.Y., Yang, C.Q., Chen, Y., Wu, Y.K., Effect of introducing Bacillus thuringiensis gene on nitrogen metabolism in cotton (2005) Field Crop. Res., 92 (1), pp. 1-9;
Chen, W.Y., Wight, D.C., Wagner, T.E., Kopchick, J.J., Expression of a mutated bovine growth hormone gene suppresses growth of transgenic mice (1990) Proc. Natl. Acad. Sci. U. S. A., 87, pp. 5061-5065;
Clements, J.E., Wall, R.J., Narayan, O., Hauer, D., Schoborg, R., Sheffer, D., Powell, A., Rexroad, C.E., Development of transgenic sheep that express the visna virus envelope gene (1994) Virology, 200, pp. 370-380;
Constanzo, A., Barberi, P., Functional agrobiodiversity and agroecosystem services in sustainable wheat production. A review (2014) Agron. Sustain. Dev., 34, pp. 327-348;
Conner, A.J., Glare, T.R., Nap, J.P., The release of genetically modified crops into the environment-part II: overview of ecological risk assessment (2003) Plant J., 33, pp. 19-46;
D'Hertefeldt, T., Jørgensen, R.B., Pettersson, L.B., Long-term persistence of GM oilseed rape in the seedbank (2008) Biol. Lett., 4, pp. 314-317;
Damak, S., Su, H., Jay, N.P., Bullock, D.W., Su, H.Y., Improved wool production in transgenic sheep expressing insulin-like growth factor 1 (1996) Biotechnology, 14, pp. 185-188;
de Bello, F., Lavorel, S., Diaz, S., Harrington, R., Cornelissen, J.H.C., Bardgett, R.D., Berg, M.P., Harrison, P.A., Towards an assessment of multiple ecosystem processes and services via functional traits (2010) Biodivers. Conserv., 19, pp. 2873-2893;
de Vaufleury, A., Kramarz, P.E., Binet, P., Cortet, J., Caul, S., Andersen, M.N., Plumey, E., Krogh, P.H., Exposure and effects assessments of Bt -maize on non-target organisms (gastropods, microarthropods, mycorrhizal fungi) in microcosms (2007) Pedobiologia, 51, pp. 185-194;
Denning, C., Burl, S., Ainslie, A., Bracken, J., Dinnyes, A., Fletcher, J., King, T., de Sousa, P., Deletion of the alpha(1,3) galactosyl transferase (GGTA1) gene and the prion protein (PrP) gene in sheep (2001) Nat. Biotechnol., 19, pp. 559-562;
deRuyter, P., Kuipers, O.P., Meijer, W.C., deVos, W.M., Food-grade controlled lysis of Lactococcus lactis for accelerated cheese ripening (1997) Nat. Biotechnol., 15, pp. 976-979;
Devlin, R.H., Biagi, C.A., Yesaki, T.Y., Smailus, D.E., Byatt, J.C., Growth of domesticated transgenic fish (2001) Nature, 409, pp. 781-782;
Devos, Y., De Schrijver, A., De Clercq, P., Kiss, J., Romeis, J., Bt-maize event MON 88017 expressing Cry3Bb1 does not cause harm to non-target organisms (2012) Transgenic Res., 21, pp. 1191-1214;
Dohrmann, A.B., Kuting, M., Junemann, S., Jaenicke, S., Schluter, A., Tebbe, C.C., Importance of rare taxa for bacterial diversity in the rhizosphere of Bt - and conventional maize varieties (2013) ISME J., 7, pp. 37-49;
Downing, K.J., Leslie, G., Thomson, J.A., Biocontrol of the sugarcane borer Eldana saccharina by expression of the Bacillus thuringiensis cry1Ac7 and Serratia marcescens chiA genes in sugarcane-associated bacteria (2000) Appl. Environ. Microbiol., 66, pp. 2804-2810;
Drahos, D.J., Hemming, B.C., Mcpherson, S., Tracking recombinant organisms in the environment-beta-galactosidase as a selectable non-antibiotic marker for fluorescent Pseudomonas (1986) Biotechnology, 4, pp. 439-444;
Du, S.J., Gong, Z., Fletcher, G.L., Shears, M.A., King, M.J., Idler, D.R., Hew, C.L., Growth enhancement in transgenic Atlantic salmon by the use of an all fish chimeric growth hormone gene construct (1992) Nat. Biotechnol., 10, pp. 176-181;
Duan, J.J., Lundgren, J.G., Naranjo, S., Marvier, M., Extrapolating non-target risk of Bt crops from laboratory to field (2010) Biol. Lett., 6, pp. 74-77;
Duc, C., Nentwig, W., Lindfeld, A., No adverse effect of genetically modified antifungal wheat on decomposition dynamics and the soil fauna community-a field study (2011) PLoS One, 6, p. e25014. , doi:25010.21371/journal.pone.0025014;
Dunfield, K.E., Germida, J.J., Seasonal changes in the rhizosphere microbial communities associated with field-grown genetically modified canola (Brassica napus) (2003) Appl. Environ. Microbiol., 69, pp. 7310-7318;
Dunham, R.A., Warr, G.W., Nichols, A., Duncan, P.L., Argue, B., Middleton, D., Kucuktas, H., Enhanced bacterial disease resistance of transgenic channel catfish Ictalurus punctatus possessing cecropin genes (2002) Mar. Biotechnol., 4, pp. 338-344;
Edgerton, M.D., Increasing crop productivity to meet global needs for feed, food, and fuel (2009) Plant Physiol., 149, pp. 7-13;
Ellstrand, N.C., Current knowledge of gene flow in plants: implications for transgene flow (2003) Philo. Trans. R Soc. Lond. Ser. B Biol. Sci., 358, pp. 1163-1170;
Ellstrand, N.C., Meirmans, P., Rong, J., Bartsch, D., Ghosh, A., de Jong, T.J., Haccou, P., Hooftman, D., Introgression of crop alleles into wild or weedy populations (2013) Annu. Rev. Ecol. Evol. Systematics, 44, pp. 325-345;
http://ec.europa.eu/food/dyna/gm_register/gm_register_auth.cfm?pr_id=18, Accessed October 6th 2014EU Register of authorised GMOs (2014), http://ec.europa.eu/food/dyna/gm_register/gm_register_auth.cfm?pr_id=19, Accessed October 6th 2014Fang, H., Dong, B., Yan, H., Tang, F.F., Wang, B.C., Yu, Y.L., Effect of vegetation of transgenic Bt rice lines and their straw amendment on soil enzymes, respiration, functional diversity and community structure of soil microorganisms under field conditions (2012) J. Environ. Sci., 24, p. 1259;
Fletcher, G.L., Shears, M.A., Yaskowiak, E.S., King, M.J., Goddard, S.V., Gene transfer: potential to enhance the genome of Atlantic salmon for aquaculture (2004) Aust. J. Exp. Agric., 44, pp. 1095-1100;
Enviropig or FrankenSwine? Why genetically modifying pigs could cause a load of Manure (2010), http://documents.foodandwaterwatch.org/doc/Enviropig.pdf#_ga=1.175912866.181127406.1412596696, Fact sheet, June 2010. Accessed October 6th 2014Forabosco, F., Lohmus, M., Rydhmer, L., Sundström, L.F., Genetically modified farm animals and fish in agriculture: a review (2013) Livest. Sci., 153, pp. 1-9;
Forsberg, C.W., Meidinger, R.G., Phillips, J.P., (2009) Developments on the EnviropigTM file 28th Centralia Swine Research Update, , http://www.centraliaswineresearch.ca/proconline.html;
Franchi, E., Tosi, C., Scolla, G., Della Penna, G., Rodriguez, F., Pedroni, P.M., Metabolically engineered Rhodobacter sphaeroides RV strains for improved biohydrogen photoproduction combined with disposal of food wastes (2004) Mar. Biotechnol., 6, pp. 552-565;
Freedman, B., Catling, P.M., Lucas, Z., Effects of feral horses on vegetation of Sable Island, Nova Scotia (2011) Can. Field-Nat., 125, pp. 200-212;
Gassmann, A.J., Petzold-Maxwell, J.L., Clifton, E.H., Dunbar, M.W., Hoffmann, A.M., Ingber, D.A., Keweshan, R.S., Field-evolved resistance by western corn rootworm to multiple Bacillus thuringiensis toxins in transgenic maize (2014) Proc. Natl. Acad. Sci. U. S. A., 111, pp. 5141-5146;
Gilbert, N., A hard look at GM crops (2013) Nature, 497, pp. 24-26;
Gliddon, C., The impacts of hybrids between genetically modified crop plants and their related species-biological models and their perspectives (1994) Mol. Ecol., 3, pp. 41-44;
Golovan, S.P., Meidinger, R.G., Ajakaiye, A., Cottrill, M., Wiederkehr, M.Z., Barney, D.J., Plante, C., Forsberg, C.W., Pigs expressing salivary phytase produce low-phosphorus manure (2001) Nat. Biotechnol., 19, p. 741;
Griffiths, B.S., Caul, S., Thompson, J., Birch, A.N.E., Cortet, J., Andersen, M.N., Krogh, P.H., Microbial and microfaunal community structure in cropping systems with genetically modified plants (2007) Pedobiologia, 51, pp. 195-206;
Grime, J.P., Benefits of plant diversity to ecosystems: immediate, filter and founder effects (1998) J. Ecol., 86, pp. 902-910;
Haegele, J.W., Below, F.E., Transgenic corn rootworm protection increases grain yield and nitrogen use of maize (2013) Crop Sci., 53, pp. 585-594;
Haney, R.L., Senseman, S.A., Hons, F.M., Effect of roundup ultra on microbial activity and biomass from selected soils (2002) J. Environ. Qual., 31, pp. 730-735;
Hannula, S.E., de Boer, W., van Veen, J., A 3-year study reveals that plant growth stage, season and field site affect soil fungal communities while cultivar and GM-trait have minor effects (2012) PLoS One, 7, p. e33819. , 33810.31371/journal.pone.0033819;
Harker, K.N., O'Donovan, J.T., Blackshaw, R.E., Beckie, H.J., Mallory-Smith, C., Maxwell, B.D., Our view (2012) Weed Sci., 60, pp. 143-144;
Haro, M.A., de Lorenzo, V., Metabolic engineering of bacteria for environmental applications: construction of Pseudomonas strains for biodegradation of 2-chlorotoluene (2001) J. Biotechnol., 85, pp. 103-113;
Hawes, C., Haughton, A.J., Osborne, J.L., Roy, D.B., Clark, S.J., Perry, J.N., Rothery, P., Squire, G.R., Responses of plants and invertebrate trophic groups to contrasting herbicide regimes in the Farm Scale Evaluations of genetically modified herbicide tolerant crops (2003) Philo. Trans. R. Soc. Lond. Ser. B Biol. Sci., 358, pp. 1899-1913;
Heap, I., The international survey of herbicide resistant weeds (2014), http://www.weedscience.com, Accessed October 6th 2014Hegarty, R.S., Reducing rumen methane emissions through elimination of rumen protozoa (1999) Aust. J. Agric. Res., 50, pp. 1321-1327;
Herrero, O., Ramon, D., Orejas, M., Engineering the Saccharomyces cerevisiae isoprenoid pathway for de novo production of aromatic monoterpenes in wine (2008) Metab. Eng., 10, pp. 78-86;
Hew, C., Poon, R., Xiong, F., Gauthier, S., Shears, M., King, M., Davies, P., Fletcher, G., Liver-specific and seasonal expression of transgenic Atlantic salmon harboring the winter flounder antifreeze protein gene (1999) Transgenic Res., 8, pp. 405-414;
Hook, S.E., Wright, A.D.G., McBride, B.W., Methanogens: methane producers of the rumen and mitigation strategies (2010), ArchaeaIcoz, I., Stotzky, G., Fate and effects of insect-resistant Bt crops in soil ecosystems (2008) Soil Biol. Biochem., 40, pp. 559-586;
Itakura, M., Uchida, Y., Akiyama, H., Hoshino, Y.T., Shimomura, Y., Morimoto, S., Tago, K., Minamisawa, K., Mitigation of nitrous oxide emissions from soils by Bradyrhizobium japonicum inoculation (2013) Nat. Clim. Change, 3, pp. 208-212;
Joutsjoki, V., Luoma, S., Tamminen, M., Kilpi, M., Johansen, E., Palva, A., Recombinant Lactococcus starters as a potential source of additional peptidolytic activity in cheese ripening (2002) J. Appl. Microbiol., 92, pp. 1159-1166;
Kawata, M., Murakami, K., Ishikawa, T., Dispersal and persistence of genetically modified oilseed rape around Japanese harbors (2009) Environ. Sci. Pollut. Res., 16, pp. 120-126;
Kerovuo, J., Tynkkynen, S., Expression of Bacillus subtilis phytase in Lactobacillus plantarum 755 (2000) Lett. Appl. Microbiol., 30, pp. 325-329;
Konishi, K., Yonai, M., Kaneyama, K., Ito, S., Matsuda, H., Yoshioka, H., Nagai, T., Imai, K., Relationships of survival time, productivity and cause of death with telomere lengths of cows produced by somatic cell nuclear transfer (2011) J. Reprod. Dev., 57, pp. 572-578;
Lachnicht, S.L., Hendrix, P.F., Potter, R.L., Coleman, D.C., Crossley, D.A., Winter decomposition of transgenic cotton residue in conventional till and no-till systems (2004) Appl. Soil Ecol., 27, pp. 135-142;
Lai, L., Kang, J.X., Li, R., Wang, J., Witt, W.T., Yong, H.Y., Hao, Y., Dai, Y., Generation of cloned transgenic pigs rich in omega-3 fatty acids (2006) Nat. Biotechnol., 24, pp. 435-436;
Lau, W., Fischbach, M.A., Osbourn, A., Sattely, E.S., Key applications of plant metabolic engineering (2014) PLoS Biol, 12. , e1001879, doi: 1001810.1001371/journal.pbio.1001879;
Légère, A., Simard, M.J., Johnson, E., Stevenson, F.C., Beckie, H., Blackshaw, R.E., Control of volunteer canola with herbicides: effects of plant growth stage and cold acclimation (2006) Weed Technol., 20, pp. 485-493;
Li, L., Pitcher, T.J., Devlin, R.H., Potential risks of trophic impacts by escaped transgenic salmon in marine environments (2015) Environ. Conserv., 42, pp. 152-161;
Li, X.G., Liu, B.A., Cui, J.J., Liu, D.D., Ding, S.A., Gilna, B., Luo, J.Y., Han, Z.M., No evidence of persistent effects of continuously planted transgenic insect-resistant cotton on soil microorganisms (2011) Plant Soil, 339, pp. 247-257;
Lilley, A.K., Bailey, M.J., The acquisition of indigenous plasmids by a genetically marked pseudomonad population colonizing the sugar beet phytosphere is related to local environmental conditions (1997) Appl. Environ. Microbiol., 63, pp. 1577-1583;
Lilley, A.K., Bailey, M.J., Barr, M., Kilshaw, K., Timms-Wilson, T.M., Day, M.J., Norris, S.J., Godfray, H.C.J., Population dynamics and gene transfer in genetically modified bacteria in a model microcosm (2003) Mol. Ecol., 12, pp. 3097-3107;
Liu, J., Yan, G., Shu, C., Zhao, C., Liu, C., Song, F., Zhou, L., Huang, D., Construction of a Bacillus thuringiensis engineered strain with high toxicity and broad pesticidal spectrum against coleopteran insects (2010) Appl. Microbiol. Biotechnol., 87, pp. 243-249;
Liu, W., Lu, H.H., Wu, W., Wei, Q.K., Chen, Y.X., Thies, J.E., Transgenic Bt rice does not affect enzyme activities and microbial composition in the rhizosphere during crop development (2008) Soil Biol. Biochem., 40, pp. 475-486;
Lo, D., Pursel, V., Linton, P.J., Sandgren, E., Behringer, R., Rexroad, C., Palmiter, R.D., Brinster, R.L., Expression of mouse IgA by transgenic mice, pigs and sheep (1991) Eur. J. Immunol., 21, pp. 1001-1006;
Londo, J.P., Bollman, M.A., Sagers, C.L., Lee, E.H., Watrud, L.S., Changes in fitness-associated traits due to the stacking of transgenic glyphosate resistance and insect resistance in Brassica napus L (2011) Heredity, 107, pp. 328-337;
Londo, J.P., Bollman, M.A., Sagers, C.L., Lee, E.H., Watrud, L.S., Glyphosate-drift but not herbivory alters the rate of transgene flow from single and stacked trait transgenic canola (Brassica napus) to nontransgenic B. napusandB. rapa (2011) New Phyt., 191, pp. 840-849;
Londoño-R, L.M., Tarkalson, D., Thies, J.E., In field rates of decomposition and microbial communities colonizing residues vary by depth of residue placement and plant part, but not by crop genotype for residues from two Cry1Ab Bt corn hybrids and their non-transgenic isolines (2013) Soil Biol. Biochem., 57, pp. 349-355;
Lu, H.H., Wu, W.X., Chen, Y.X., Zhang, X.J., Devare, M., Thies, J.E., Decomposition of Bt transgenic rice residues and response of soil microbial community in rapeseed-rice cropping system (2010) Plant Soil, 336, pp. 279-290;
Lu, Y.H., Wu, K.M., Jiang, Y.Y., Xia, B., Li, P., Feng, H.Q., Wyckhuys, K.A.G., Guo, Y.Y., Mirid bug outbreaks in multiple crops correlated with wide scale adoption of Bt cotton in China (2010) Science, 328, pp. 1151-1154;
Lupwayi, N.Z., Hanson, K.G., Harker, K.N., Clayton, G.W., Blackshaw, R.E., O'Donovan, J.T., Johnson, E.N., Monreal, M.A., Soil microbial biomass, functional diversity and enzyme activity in glyphosate-resistant wheat-canola rotations under low-disturbance direct seeding and conventional tillage (2007) Soil Biol. Biochem., 39, pp. 1418-1427;
Lyall, J., Irvine, R.M., Sherman, A., McKinley, T.J., Nunez, A., Purdie, A., Outtrim, L., Tiley, L., Suppression of avian influenza transmission in genetically modified chickens (2011) Science, 331, pp. 223-226;
Marshall, J.M., The cartagena protocol and genetically modified mosquitoes (2010) Nat. Biotechnol., 28, pp. 896-897;
Marvier, M., Using meta-analysis to inform risk assessment and risk management (2011) J. Consum. Prot. Food Saf., 6, pp. 113-118;
Medeiros, E., Phelps, M., Fuentes, F., Bradley, T., Overexpression of follistatin in trout stimulates increased muscling (2009) Am. J. Physiol. Regul. Integr. Comp. Physiol., 297, pp. R235-R242;
(2014), http://www.monsanto.com/products/pages/refuge.aspx, Accessed October 6th 2014(2014), http://www.monsanto.com/products/pages/refuge-in-the-bag-corn-products.aspx, Accessed October 6th 2014Mortensen, D.A., Egan, J.F., Maxwell, B.D., Ryan, M.R., Smith, R.G., Navigating a critical juncture for sustainable weed management (2012) Bioscience, 62, pp. 75-84;
Motavalli, P.P., Kremer, R.J., Fang, M., Means, N.E., Impact of genetically modified crops and their management on soil microbially mediated plant nutrient ransformations (2004) J. Environ. Qual., 33, pp. 816-824;
Mozdziak, P.E., Pophal, S., Borwornpinyo, S., Petitte, J.N., Transgenic chickens expressing beta-galactosidase hydrolyze lactose in the intestine (2003) J. Nutr., 133, pp. 3076-3079;
Mueller, N.D., Gerber, J.S., Johnston, M., Ray, D.K., Ramankutty, N., Foley, J.A., Closing yield gaps through nutrient and water management (2012) Nature, 490, pp. 254-257;
Mungai, N.W., Motavalli, P.P., Nelson, K.A., Kremer, R.J., Differences in yields, residue composition and N mineralization dynamics of Bt and non- Bt maize (2005) Nutr. Cycl. Agroecosyst., 73, pp. 101-109;
Naik, G., Qaim, M., Subramanian, A., Zilberman, D., Bt cotton controversy: some paradoxes explained (2005) Econ. Polit. Wkly., 40, pp. 1514-1517;
Nam, Y.K., Maclean, N., Hwang, G., Kim, D.S., Autotransgenic and allotransgenic manipulation of growth traits in fish for aquaculture: a review (2008) J. Fish Biol., 72 (1), pp. 1-26;
Naranjo, S.E., Impacts of Bt transgenic cotton on integrated pest management (2011) J. Agric. Food Chem., 59, pp. 5842-5851;
Nottle, M.B., Nagashima, H., Verma, P.J., Du, Z.T., Grupen, C.G., McIlfatrick, S.M., Ashman, R.J., Robins, A.J., Production and analysis of transgenic pigs containing a metallothionein porcine growth hormone gene construct (1999) Transgenic Animals in Agriculture, pp. 145-156. , CABI, Wallingford, J.D. Murray, G.B. Anderson, A.M. Oberbauer, M.M. McGloughlin (Eds.);
Oh, Y.K., Raj, S.M., Jung, G.Y., Park, S., Current status of the metabolic engineering of microorganisms for biohydrogen production (2011) Bioresour. Technol., 102, pp. 8357-8367;
Philippot, L., Hallin, S., Towards food, feed and energy crops mitigating climate change (2011) Trends Plant Sci., 16, pp. 476-480;
Philippot, L., Kuffner, M., Cheneby, D., Depret, G., Laguerre, G., Martin-Laurent, F., Genetic structure and activity of the nitrate-reducers community in the rhizosphere of different cultivars of maize (2006) Plant Soil, 287, pp. 177-186;
Phillips, J.P., Golovan, S.P., Meidinger, R.G., Forsberg, C.W., Transgenic enhancement of nutrient cycling: moving toward an environmentally sustainable animal agriculture, Proceedings of the 8th World Congress on Genetics Applied to Livestock Production, Belo Horizonte, Minas Gerais, Brazil, 13-18 August, 2006 (2006), pp. 19-20. , Instituto Prociencia, Minas GeraisPleasants, J.M., Oberhauser, K.S., Milkweed loss in agricultural fields because of herbicide use: effect on the monarch butterfly population (2013) Insect Conserv. Divers., 6, pp. 135-144;
Pursel, V.G., Sutrave, P., Wall, R.J., Kelly, A.M., Hughes, S.H., Transfer of C-Ski gene into swine to enhance muscle development (1992) Theriogenology, 37, p. 278;
Ramsay, G., Thompson, C., Squire, G., Quantifying landscape-scale gene flow in oilseed rape (2003), Department for Environment, Food and Rural Affairs; LondonRanathunge, K., El-Kereamy, A., Gidda, S., Bi, Y.M., Rothstein, S.J., AMT11 transgenic rice plants with enhanced NH<inf>4</inf> permeability show superior growth and higher yield under optimal and suboptimal NH<inf>4</inf> conditions (2014) J. Exp. Bot., 65, pp. 965-979;
Ray, D.K., Ramankutty, N., Mueller, N.D., West, P.C., Foley, J.A., Recent patterns of crop yield growth and stagnation (2012), 3, p. 1293. , Nat. Commun, doi: 1210.1038/ncomms2296Reeves, R.G., Denton, J.A., Santucci, F., Bryk, J., Reed, F.A., Scientific standards and the regulation of genetically modified insects (2012) PLoS Negl. Trop. Dis, 6, p. e1502. , doi: 1510.1371/journal.pntd.0001502;
Reh, W.A., Maga, E.A., Collette, N.M., Moyer, A., Conrad-Brink, J.S., Taylor, S.J., DePeters, E.J., Murray, J.D., Hot topic: using a stearoyl-CoA desaturase transgene to alter milk fatty acid composition (2004) J. Dairy Sci., 87, pp. 3510-3514;
Richardson, D., Felgate, H., Watmough, N., Thomson, A., Baggs, E., Mitigating release of the potent greenhouse gas N<inf>2</inf>O from the nitrogen cycle-could enzymic regulation hold the key? (2009) Trends Biotechnol., 27, pp. 388-397;
Richt, J.A., Kasinathan, P., Hamir, A.N., Castilla, J., Sathiyaseelan, T., Vargas, F., Sathiyaseelan, J., Kuroiwa, Y., Production of cattle lacking prion protein (2007) Nat. Biotechnol., 25, pp. 132-138;
Ripp, S., Nivens, D.E., Ahn, Y., Werner, C., Jarrell, J., Easter, J.P., Cox, C.D., Sayler, G.S., Controlled field release of a bioluminescent genetically engineered microorganism for bioremediation process monitoring and control (2000) Environ. Sci. Technol., 34, pp. 846-853;
Ross, E.M., Moate, P.J., Marett, L., Cocks, B.G., Hayes, B.J., Investigating the effect of two methane-mitigating diets on the rumen microbiome using massively parallel sequencing (2013) J. Dairy Sci., 96. , 1-17;
Saeki, K., Matsumoto, K., Kinoshita, M., Suzuki, I., Tasaka, Y., Kano, K., Taguchi, Y., Iritani, A., Functional expression of a Delta12 fatty acid desaturase gene from spinach in transgenic pigs (2004) Proc. Natl. Acad. Sci. U. S. A, 101, pp. 6361-6366;
Salter, D.W., Crittenden, L.B., Artificial insertion of a dominant gene for resistance to avian leukosis virus into the germ line of the chicken (1989) Theor. Appl. Genet., 77. , 457-461;
Sarkar, B., Patra, A.K., Purakayastha, T.J., Transgenic Bt -cotton affects enzyme activity and nutrient availability in a sub-tropical inceptisol (2008) J. Agron. Crop Sci., 194, pp. 289-296;
Schafer, M.G., Ross, A.A., Londo, J.P., Burdick, C.A., Lee, E.H., Travers, S.E., Van de Water, P.K., Sagers, C.L., The establishment of genetically engineered Canola populations in the US (2011) PLoS One, 6, p. e25736. , doi: 25710.21371/journal.pone.0025736;
Scharfen, E.C., Mills, D.A., Maga, E.A., Use of human lysozyme transgenic goat milk in cheese making: effects on lactic acid bacteria performance (2007) J. Dairy Sci., 90, pp. 4084-4091;
Schmalenberger, A., Tebbe, C.C., Genetic profiling of noncultivated bacteria from the rhizospheres of sugar beet (Beta vulgaris) reveal field and annual variability but no effect of a transgenic herbicide resistance (2003) Can. J. Microbiol., 49, pp. 1-8;
Schwartz, M.W., Brigham, C.A., Hoeksema, J.D., Lyons, K.G., Mills, M.H., van Mantgem, P.J., Linking biodiversity to ecosystem function: implications for conservation ecology (2000) Oecologia, 122, pp. 297-305;
Schwieger, F., Tebbe, C.C., Effect of field inoculation with Sinorhizobium meliloti L33 on the composition of bacterial communities in rhizospheres of a target plant (Medicago sativa) and a non-target plant (Chenopodium album)-linking of 16S rRNA gene-based single-strand conformation polymorphism community profiles to the diversity of cultivated bacteria (2000) Appl. Environ. Microbiol, 66, pp. 3556-3565;
Sessitsch, A., Gyamfi, S., Tscherko, D., Gerzabek, M.H., Kandeler, E., Activity of microorganisms in the rhizosphere of herbicide treated and untreated transgenic glufosinate-tolerant and wildtype oilseed rape grown in containment (2004) Plant Soil, 266, pp. 105-116;
Sester, M., Darmency, H., Colbach, N., Contribution of groundkeepers vs. weed beet to gene escape from sugar beet (Beta vulgaris spp.). Consequences for growing genetically-modified sugar beet-a modelling approach (2012) Field Crop. Res., 135, pp. 46-57;
Shen, R.F., Cai, H., Gong, W.H., Transgenic Bt cotton has no apparent effect on enzymatic activities or functional diversity of microbial communities in rhizosphere soil (2006) Plant Soil, 285, pp. 149-159;
Shi, G.M., Chavas, J.P., Lauer, J., Commercialized transgenic traits, maize productivity and yield risk (2013) Nat. Biotechnol., 31, pp. 111-114;
Shintani, M., Matsui, K., Inoue, J., Hosoyama, A., Ohji, S., Yamazoe, A., Nojiri, H., Ohkuma, M., Single-cell analyses revealed transfer ranges of IncP-1, IncP-7, and IncP-9 plasmids in a soil bacterial community (2014) Appl. Environ. Microbiol., 80, pp. 138-145;
Shu, Y.H., Ma, H.H., Du, Y., Li, Z.X., Feng, Y.J., Wang, J.W., The presence of Bacillus thuringiensis (Bt) protein in earthworms Eisenia fetida has no deleterious effects on their growth and reproduction (2011) Chemosphere, 85, pp. 1648-1656;
Skot, L., Harrison, S.P., Nath, A., Mytton, L.R., Clifford, B.C., Expression of insecticidal activity in Rhizobium containing the delta-endotoxin gene cloned from Bacillus thuringiensis subsp. tenebrionis (1990) Plant Soil, 127, pp. 285-295;
Squire, G.R., Breckling, B., Dietz, P., feilstetter, A., Jørgensen, R.B., Lecomte, J., Pivard, S., Young, M.W., Status of feral oilseed rape in Europe: its minor role as a GM impurity and its potential as a reservoir of transgene persistence (2011) Environ. Sci. Pollut. Res., 18, pp. 111-115;
Squire, G.R., Brooks, D.R., Bohan, D.A., Champion, G.T., Daniels, R.E., Haughton, A.J., Hawes, C., Firbank, L.G., On the rationale and interpretation of the farm scale evaluations of genetically modified herbicide-tolerant crops (2003) Philo. Trans. R. Soc. Lond. Ser. B Biol. Sci., 358, pp. 1779-1799;
Steinfeld, H., Gerber, P., Wassenaar, T., Castel, V., Rosales, M., de Haan, C., (2006) Livestock's long shadow, , United Nations Food and Agriculture Organization, Rome;
Subbarao, G.V., Ishikawa, T., Ito, O., Nakahara, K., Wang, H.Y., Berry, W.L., A biolumiuescence assay to detect nitrification inhibitors released from plant roots: a case study with Brachiaria humidicola (2006) Plant Soil, 288, pp. 101-112;
Subbarao, G.V., Nakahara, K., Hurtado, M.P., Ono, H., Moreta, D.E., Salcedo, A.F., Yoshihashi, A.T., Ito, O., Evidence for biological nitrification inhibition in Brachiaria pastures (2009) Proc. Natl. Acad. Sci. U. S. A., 106, pp. 17302-17307;
Subbarao, G.V., Tomohiro, B., Masahiro, K., Osamu, I., Samejima, H., Wang, H.Y., Pearse, S.J., Berry, W.L., Can biological nitrification inhibition (BNI) genes from perennial Leymus racemosus (Triticeae) combat nitrification in wheat farming? (2007) Plant Soil, 299, pp. 55-64;
Sundström, L.F., Lohmus, M., Devlin, R.H., Migration and growth potential of coho salmon smolts: implications for ecological impacts from growth-enhanced fish (2010) Ecol. Appl., 20, pp. 1372-1383;
Sutton, M.A., Oenema, O., Erisman, J.W., Leip, A., van Grinsven, H., Winiwarter, W., Too much of a good thing (2011) Nature, 472, pp. 159-161;
Swan, C.M., Jensen, P.D., Dively, G.P., Lamp, W.O., Processing of transgenic crop residues in stream ecosystems (2009) J. Appl. Ecol., 46, pp. 1304-1313;
Sybesma, W., van den Born, E., Starrenburg, M., Mierau, I., Kleerebezem, M., de Vos, W.M., Hugenholtz, J., Controlled modulation of folate polyglutamyl tail length by metabolic engineering of Lactococcus lactis (2003) Appl. Environ. Microbiol., 69, pp. 7101-7107;
Tabashnik, B.E., Brevault, T., Carriere, Y., Insect resistance to Bt crops: lessons from the first billion acres (2013) Nat. Biotechnol., 31, pp. 510-521;
Tabashnik, B.E., Sisterson, M.S., Ellsworth, P.C., Dennehy, T.J., Antilla, L., Liesner, L., Whitlow, M., Carriere, Y., Suppressing resistance to Bt cotton with sterile insect releases (2010) Nat. Biotechnol., 28, pp. 1304-1309;
Thomas, D.D., Donnelly, C.A., Wood, R.J., Alphey, L.S., Insect population control using a dominant, repressible, lethal genetic system (2000) Science, 287, pp. 2474-2476;
Timms-Wilson, T.M., Ellis, R.J., Renwick, A., Rhodes, D.J., Mavrodi, D.V., Weller, D.M., Thomashow, L.S., Bailey, M.J., Chromosomal insertion of phenazine-1-carboxylic acid biosynthetic pathway enhances efficacy of damping-off disease control by Pseudomonas fluorescens (2000) Mol. Plant Microbe Interact., 13, pp. 1293-1300;
Tong, J., Wei, H., Liu, X., Hu, W., Bi, M., Wang, Y., Li, Q., Li, N., Production of recombinant human lysozyme in the milk of transgenic pigs (2011) Transgenic Res., 20, pp. 417-419;
Udayasuriyan, V., Nakamura, A., Masaki, H., Uozumi, T., Transfer of an insecticidal protein gene of Bacillus thuringiensis into plant-colonizing Azospirillum (1995) World J. Microbiol. Biotechnol., 11, pp. 163-167;
Valls, M., Atrian, S., de Lorenzo, V., Fernandez, L.A., Engineering a mouse metallothionein on the cell surface of Ralstonia eutropha CH34 for immobilization of heavy metals in soil (2000) Nat. Biotechnol., 18, pp. 661-665;
van Dillewijn, P., Soto, M.J., Villadas, P.J., Toro, N., Construction and environmental release of a Sinorhizobium meliloti strain genetically modified to be more competitive for alfalfa nodulation (2001) Appl. Environ. Microbiol., 67, pp. 3860-3865;
van Dillewijn, P., Villadas, P.J., Toro, N., Effect of a Sinorhizobium meliloti strain with a modified putA gene on the rhizosphere microbial community of alfalfa (2002) Appl. Environ. Microbiol., 68, pp. 4201-4208;
Vauramo, S., Pasonen, H.L., Pappinen, A., Setala, H., Decomposition of leaf litter from chitinase transgenic silver birch (Betula pendula) and effects on decomposer populations in a field trial (2006) Appl. Soil Ecol., 32, pp. 338-349;
Verwaal, R., Wang, J., Meijnen, J.-P., Visser, H., Sandmann, G., van den Berg, J.A., van Ooyen, A.J.J., High-level production of beta-carotene in Saccharomyces cerevisiae by successive transformation with carotenogenic genes from Xanthophyllomyces dendrorhous (2007) Appl. Environ. Microbiol., 73, pp. 4342-4350;
Vicedo, B., Penalver, R., Asins, M.J., Lopez, M.M., Biological control of Agrobacterium tumefaciens, colonization, and pAgK48 transfer with Agrobacterium radiobacter K84 and the Tra-mutant K1060 (1993) Appl. Environ. Microbiol., 59, pp. 309-315;
Wall, R.J., Powell, A.M., Paape, M.J., Kerr, D.E., Bannerman, D.D., Pursel, V.G., Wells, K.D., Hawk, H.W., Genetically enhanced cows resist intramammary Staphylococcus aureus infection (2005) Nat. Biotechnol., 23, pp. 445-451;
Wan, S., Johnson, A.M., Altosaar, I., Expression of nitrous oxide reductase from Pseudomonas stutzeri in transgenic tobacco roots using the root-specific rolD promoter from Agrobacterium rhizogenes (2012) Ecol. Evol, 2, pp. 286-297;
Wang, C.X., Knill, E., Glick, B.R., Defago, G., Effect of transferring 1-aminocyclopropane-1-carboxylic acid (ACC) deaminase genes into Pseudomonas fluorescens strain CHA0 and its gacA derivative CHA96 on their growth-promoting and disease-suppressive capacities (2000) Can. J. Microbiol., 46, pp. 898-907;
Warwick, S.I., Legere, A., Simard, M.J., James, T., Do escaped transgenes persist in nature? The case of an herbicide resistance transgene in a weedy Brassica rapa population (2008) Mol. Ecol., 17, pp. 1387-1395;
Watrud, L.S., King, G., Londo, J.P., Colasanti, R., Smith, B.M., Waschmann, R.S., Lee, E.H., Changes in constructed Brassica communities treated with glyphosate drift (2011) Ecol. Appl., 21, pp. 525-538;
Weih, M., Trade-offs in plants and the prospects for breeding using modern biotechnology (2003) New Phyt., 158, pp. 7-9;
Weih, M., Didon, U.M.E., Rönnberg-Wästljung, A.C., Böjrkman, C., Integrated agricultural research and crop breeding: allelopathic weed control in cereals and long-term productivity in perennial bionmass crops (2008) Agric. Syst., 97, pp. 99-107;
Weih, M., Hoeber, S., Beyer, F.P.F., Traits to ecosystems: the ecological sustainability challenge when developing future energy crops (2014) Front. Energy Res., 2, p. 17;
Whitham, T.G., Bailey, J.K., Schweitzer, J.A., Shuster, S.M., Bangert, R.K., Leroy, C.J., Lonsdorf, E.V., Wooley, S.C., A framework for community and ecosystem genetics: from genes to ecosystems (2006) Nat. Rev. Genet., 7, pp. 510-523;
Wimmer, E.A., Applications of insect transgenesis (2003) Nat. Rev. Genet., 4, pp. 225-232;
Wu, X., Ouyang, H., Duan, B., Pang, D., Zhang, L., Yuan, T., Xue, L., Li, G.P., Production of cloned transgenic cow expressing omega-3 fatty acids (2012) Transgenic Res., 21, pp. 537-543;
Xu, Z., Hennessy, D.A., Sardana, K., Moschini, G., The realized yield effect of genetically engineered crops: US maize and soybean (2013) Crop Sci., 53, pp. 735-745;
Yang, B., Wang, J., Tang, B., Liu, Y., Guo, C., Yang, P., Yu, T., Li, N., Characterization of bioactive recombinant human lysozyme expressed in milk of cloned transgenic cattle (2011) PLoS One, 6, p. e17593;
Yanni, S.F., Whalen, J.K., Ma, B.L., Crop residue chemistry, decomposition rates, and CO<inf>2</inf> evolution in Bt and non- Bt corn agroecosystems in North America: a review (2010) Nutr. Cycl. Agroecosyst., 87, pp. 277-293;
Zapiola, M.L., Campbell, C.K., Butler, M.D., Mallory-Smith, C.A., Escape and establishment of transgenic glyphosate-resistant creeping bentgrass Agrostis stolonifera in Oregon, USA: a 4-year study (2008) J. Appl. Ecol., 45, pp. 486-494;
Zapiola, M.L., Mallory-Smith, C.A., Crossing the divide: gene flow produces intergeneric hybrid in feral transgenic creeping bentgrass population (2012) Mol. Ecol., 21, pp. 4672-4680;
Zeller, S.L., Kalinina, O., Brunner, S., Keller, B., Schmid, B., Transgene x environment interactions in genetically modified wheat (2010) PLoS One, 5. , e11405, doi: 11410.11371/journal.pone.0011405;
Zhang, H.N., Tian, W., Zhao, J., Jin, L., Yang, J., Liu, C.H., Yang, Y.H., Wu, Y.D., Diverse genetic basis of field-evolved resistance to Bt cotton in cotton bollworm from China (2012) Proc. Natl. Acad. Sci. U. S. A., 109, pp. 10275-10280;
Zhao, J.H., Ho, P., Azadi, H., Benefits of Bt cotton counterbalanced by secondary pests? Perceptions of ecological change in China (2011) Environ. Monit. Assess., 173, pp. 985-994;
Zilberman, D., Sexton, S.E., Marra, M., Fernandez-Cornejo, F., The economic impact of genetically engineered crops (2010) Choices Mag. Food Farm Resour., (2). , Issues 25
N1  - References: Alfred, J., Dangl, J.L., Kamoun, S., McCouch, S.R., New horizons for plant translational research (2014) PLoS Biol., 12, p. e1001880. , doi: 1001810.1001371/journal.pbio.1001880; 
Alston, J.M., Beddow, J.M., Pardey, P.G., Agricultural research, productivity, and food prices in the long run (2009) Science, 325, pp. 1209-1210;
Andronov, E.E., Petrova, S.N., Chizhevskaya, E.P., Korostik, E.V., Akhtemova, G.A., Pinaev, A.G., Influence of introducing the genetically modified strain Sinorhizobium meliloti ACH-5 on the structure of the soil microbial community (2009) Microbiology, 78, pp. 474-482;
Areal, F.J., Riesgo, L., Rodriguez-Cerezo, E., Economic and agronomic impact of commercialized GM crops: a meta-analysis (2013) J. Agric. Sci., 151, pp. 7-33;
Axelsson, E.P., Hjältén, J., LeRoy, C.J., Whitham, T.G., Julkunen-Tiitto, R., Wennström, A., Leaf litter from insect-resistant transgenic trees causes changes in aquatic insect community composition (2011) J. Appl. Ecol., 48, pp. 1472-1479;
Bagavathiannan, M.V., Norsworthy, J.K., Smith, K.L., Neve, P., Modeling the simultaneous evolution of resistance to ALS- and ACCase-inhibiting herbicides in barnyardgrass (Echinochloa crus-galli) in Clearfield® rice (2014) Weed Technol., 28, pp. 89-103;
Bankhead, S.B., Landa, B.B., Lutton, E., Weller, D.M., Gardener, B.B.M., Minimal changes in rhizobacterial population structure following root colonization by wild type and transgenic biocontrol strains (2004) FEMS Microbiol. Ecol., 49, pp. 307-318;
Baumgarte, S., Tebbe, C.C., Field studies on the environmental fate of the Cry1Ab Bt -toxin produced by transgenic maize (MON810) and its effect on bacterial communities in the maize rhizosphere (2005) Mol. Ecol., 14, pp. 2539-2551;
Beckie, H.J., Harker, K.N., Hall, L.M., Warwick, S.I., Legere, A., Sikkema, P.H., Clayton, G.W., Simard, M.J., A decade of herbicide-resistant crops in Canada (2006) Can. J. Plant Sci., 86, pp. 1243-1264;
Begg, G.S., Hockaday, S., McNicol, J.W., Askew, M., Squire, G.R., Modelling the persistence of volunteer oilseed rape (Brassica napus) (2006) Ecol. Modell., 198, pp. 195-207;
Behnke, K., Grote, R., Bruggemann, N., Zimmer, I., Zhou, G.W., Elobeid, M., Janz, D., Schnitzler, J.P., Isoprene emission-free poplars-a chance to reduce the impact from poplar plantations on the atmosphere (2012) New Phyt., 194, pp. 70-82;
Beltran, R.S., Kreidler, N., Van Vuren, D.H., Morrison, S.A., Zavaleta, E.S., Newton, K., TershyB, R., Croll, D.A., Passive recovery of vegetation after herbivore eradication on Santa Cruz Island, California (2014) Restor. Ecol., 22, pp. 790-797;
Benbrook, C.M., Impacts of genetically engineered crops on pesticide use in the US-the first sixteen years (2012) Environ. Sci. Eur., 24, p. 24;
Benedict, M., Eckerstorfer, M., Franz, G., Gaugitsch, H., Greiter, A., Heissenberger, A., Knols, B., Rabitsch, W., Defining environmental risk assessment criteria for genetically modified insects to be placed on the EU Market (2010), European Food Safety Authority; ParmaBirch, A.N.E., Griffiths, B.S., Caul, S., Thompson, J., Heckmann, L.H., Krogh, P.H., Cortet, J., The role of laboratory, glasshouse and field scale experiments in understanding the interactions between genetically modified crops and soil ecosystems: a review of the ECOGEN project (2007) Pedobiologia, 51, pp. 251-260;
Blackwood, C.B., Buyer, J.S., Soil microbial communities associated with Bt and non-Bt corn in three soils (2004) J. Environ. Qual., 33, pp. 832-836;
Bleck, G.T., White, B.R., Miller, D.J., Wheeler, M.B., Production of bovine alpha-lactalbumin in the milk of transgenic pigs (1998) J. Anim. Sci., 76, pp. 3072-3078;
Boete, C., Agusto, F.B., Reeves, R.G., Impact of mating behaviour on the success of malaria control through a single inundative release of transgenic mosquitoes (2014) J. Theor. Biol., 347, pp. 33-43;
Bosworth, A.H., Williams, M.K., Albrecht, K.A., Kwiatkowski, R., Beynon, J., Hankinson, T.R., Ronson, C.W., Triplett, E.W., Alfalfa yield response to inoculation with recombinant strains of Rhizobium meliloti with an extra copy of dctABD and/or modified nifA expression (1994) Appl. Environ. Microbiol., 60, pp. 3815-3832;
Brookes, G., Barfoot, P., Global impact of biotech crops: environmental effects, 1996-2008 (2010) AgBioForum, 13, pp. 76-94;
Brophy, B., Smolenski, G., Wheeler, T., Wells, D., L'Huillier, P., Laible, G., Cloned transgenic cattle produce milk with higher levels of beta-casein and kappa-casein (2003) Nat. Biotechnol., 21, pp. 157-161;
Butler, T.M., Fletcher, G.L., Promoter analysis of a growth hormone transgene in Atlantic salmon (2009) Theriogenology, 72, pp. 62-71;
Chambers, C.P., Whiles, M.R., Rosi-Marshall, E.J., Tank, J.L., Royer, T.V., Griffiths, N.A., Evans-White, M.A., Stojak, A.R., Responses of stream macroinvertebrates to Bt maize leaf detritus (2010) Ecol. Appl., 20, pp. 1949-1960;
Cheeke, T.E., Effects of the cultivation of genetically modified Bt crops on nontarget soil organisms (2012) Microbial Ecology in Sustainable Agroecosystems, pp. 153-227. , Boca Raton, CRC Press, T.E. Cheeke, D.C. Coleman, D.H. Wall (Eds.);
Cheeke, T.E., Cruzan, M.B., Rosenstiel, T.N., A field evaluation of arbuscular mycorrhizal fungal colonization in Bacillus thuringiensis toxin-expressing (Bt) and Non- Bt Maize (2013) Appl. Environ. Microbiol., 79, pp. 4078-4086;
Cheeke, T.E., Darby, H., Bever, J.D., Rosenstiel, T.N., Cruzan, M.B., Effect of Bt maize cultivation history on arbuscular mycorrhizal fungal colonization, spore abundance and diversity, and plant growth (2014) Agric. Ecosyst. Environ., 195, pp. 29-35;
Cheeke, T.E., Pace, B.A., Rosenstiel, T.N., Cruzan, M.B., The influence of fertilizer level and spore density on arbuscular mycorrhizal colonization of transgenic Bt 11 maize (Zea mays) in experimental microcosms (2011) FEMS Microbiol. Ecol., 75, pp. 304-312;
Cheeke, T.E., Rosenstiel, T.N., Cruzan, M.B., Evidence of reduced arbuscular mycorrhizal fungal colonization in multiple lines of Bt maize (2012) Am. J. Bot., 99, pp. 700-707;
Chen, D.H., Ye, G.Y., Yang, C.Q., Chen, Y., Wu, Y.K., Effect of introducing Bacillus thuringiensis gene on nitrogen metabolism in cotton (2005) Field Crop. Res., 92 (1), pp. 1-9;
Chen, W.Y., Wight, D.C., Wagner, T.E., Kopchick, J.J., Expression of a mutated bovine growth hormone gene suppresses growth of transgenic mice (1990) Proc. Natl. Acad. Sci. U. S. A., 87, pp. 5061-5065;
Clements, J.E., Wall, R.J., Narayan, O., Hauer, D., Schoborg, R., Sheffer, D., Powell, A., Rexroad, C.E., Development of transgenic sheep that express the visna virus envelope gene (1994) Virology, 200, pp. 370-380;
Constanzo, A., Barberi, P., Functional agrobiodiversity and agroecosystem services in sustainable wheat production. A review (2014) Agron. Sustain. Dev., 34, pp. 327-348;
Conner, A.J., Glare, T.R., Nap, J.P., The release of genetically modified crops into the environment-part II: overview of ecological risk assessment (2003) Plant J., 33, pp. 19-46;
D'Hertefeldt, T., Jørgensen, R.B., Pettersson, L.B., Long-term persistence of GM oilseed rape in the seedbank (2008) Biol. Lett., 4, pp. 314-317;
Damak, S., Su, H., Jay, N.P., Bullock, D.W., Su, H.Y., Improved wool production in transgenic sheep expressing insulin-like growth factor 1 (1996) Biotechnology, 14, pp. 185-188;
de Bello, F., Lavorel, S., Diaz, S., Harrington, R., Cornelissen, J.H.C., Bardgett, R.D., Berg, M.P., Harrison, P.A., Towards an assessment of multiple ecosystem processes and services via functional traits (2010) Biodivers. Conserv., 19, pp. 2873-2893;
de Vaufleury, A., Kramarz, P.E., Binet, P., Cortet, J., Caul, S., Andersen, M.N., Plumey, E., Krogh, P.H., Exposure and effects assessments of Bt -maize on non-target organisms (gastropods, microarthropods, mycorrhizal fungi) in microcosms (2007) Pedobiologia, 51, pp. 185-194;
Denning, C., Burl, S., Ainslie, A., Bracken, J., Dinnyes, A., Fletcher, J., King, T., de Sousa, P., Deletion of the alpha(1,3) galactosyl transferase (GGTA1) gene and the prion protein (PrP) gene in sheep (2001) Nat. Biotechnol., 19, pp. 559-562;
deRuyter, P., Kuipers, O.P., Meijer, W.C., deVos, W.M., Food-grade controlled lysis of Lactococcus lactis for accelerated cheese ripening (1997) Nat. Biotechnol., 15, pp. 976-979;
Devlin, R.H., Biagi, C.A., Yesaki, T.Y., Smailus, D.E., Byatt, J.C., Growth of domesticated transgenic fish (2001) Nature, 409, pp. 781-782;
Devos, Y., De Schrijver, A., De Clercq, P., Kiss, J., Romeis, J., Bt-maize event MON 88017 expressing Cry3Bb1 does not cause harm to non-target organisms (2012) Transgenic Res., 21, pp. 1191-1214;
Dohrmann, A.B., Kuting, M., Junemann, S., Jaenicke, S., Schluter, A., Tebbe, C.C., Importance of rare taxa for bacterial diversity in the rhizosphere of Bt - and conventional maize varieties (2013) ISME J., 7, pp. 37-49;
Downing, K.J., Leslie, G., Thomson, J.A., Biocontrol of the sugarcane borer Eldana saccharina by expression of the Bacillus thuringiensis cry1Ac7 and Serratia marcescens chiA genes in sugarcane-associated bacteria (2000) Appl. Environ. Microbiol., 66, pp. 2804-2810;
Drahos, D.J., Hemming, B.C., Mcpherson, S., Tracking recombinant organisms in the environment-beta-galactosidase as a selectable non-antibiotic marker for fluorescent Pseudomonas (1986) Biotechnology, 4, pp. 439-444;
Du, S.J., Gong, Z., Fletcher, G.L., Shears, M.A., King, M.J., Idler, D.R., Hew, C.L., Growth enhancement in transgenic Atlantic salmon by the use of an all fish chimeric growth hormone gene construct (1992) Nat. Biotechnol., 10, pp. 176-181;
Duan, J.J., Lundgren, J.G., Naranjo, S., Marvier, M., Extrapolating non-target risk of Bt crops from laboratory to field (2010) Biol. Lett., 6, pp. 74-77;
Duc, C., Nentwig, W., Lindfeld, A., No adverse effect of genetically modified antifungal wheat on decomposition dynamics and the soil fauna community-a field study (2011) PLoS One, 6, p. e25014. , doi:25010.21371/journal.pone.0025014;
Dunfield, K.E., Germida, J.J., Seasonal changes in the rhizosphere microbial communities associated with field-grown genetically modified canola (Brassica napus) (2003) Appl. Environ. Microbiol., 69, pp. 7310-7318;
Dunham, R.A., Warr, G.W., Nichols, A., Duncan, P.L., Argue, B., Middleton, D., Kucuktas, H., Enhanced bacterial disease resistance of transgenic channel catfish Ictalurus punctatus possessing cecropin genes (2002) Mar. Biotechnol., 4, pp. 338-344;
Edgerton, M.D., Increasing crop productivity to meet global needs for feed, food, and fuel (2009) Plant Physiol., 149, pp. 7-13;
Ellstrand, N.C., Current knowledge of gene flow in plants: implications for transgene flow (2003) Philo. Trans. R Soc. Lond. Ser. B Biol. Sci., 358, pp. 1163-1170;
Ellstrand, N.C., Meirmans, P., Rong, J., Bartsch, D., Ghosh, A., de Jong, T.J., Haccou, P., Hooftman, D., Introgression of crop alleles into wild or weedy populations (2013) Annu. Rev. Ecol. Evol. Systematics, 44, pp. 325-345;
http://ec.europa.eu/food/dyna/gm_register/gm_register_auth.cfm?pr_id=18, Accessed October 6th 2014EU Register of authorised GMOs (2014), http://ec.europa.eu/food/dyna/gm_register/gm_register_auth.cfm?pr_id=19, Accessed October 6th 2014Fang, H., Dong, B., Yan, H., Tang, F.F., Wang, B.C., Yu, Y.L., Effect of vegetation of transgenic Bt rice lines and their straw amendment on soil enzymes, respiration, functional diversity and community structure of soil microorganisms under field conditions (2012) J. Environ. Sci., 24, p. 1259;
Fletcher, G.L., Shears, M.A., Yaskowiak, E.S., King, M.J., Goddard, S.V., Gene transfer: potential to enhance the genome of Atlantic salmon for aquaculture (2004) Aust. J. Exp. Agric., 44, pp. 1095-1100;
Enviropig or FrankenSwine? Why genetically modifying pigs could cause a load of Manure (2010), http://documents.foodandwaterwatch.org/doc/Enviropig.pdf#_ga=1.175912866.181127406.1412596696, Fact sheet, June 2010. Accessed October 6th 2014Forabosco, F., Lohmus, M., Rydhmer, L., Sundström, L.F., Genetically modified farm animals and fish in agriculture: a review (2013) Livest. Sci., 153, pp. 1-9;
Forsberg, C.W., Meidinger, R.G., Phillips, J.P., (2009) Developments on the EnviropigTM file 28th Centralia Swine Research Update, , http://www.centraliaswineresearch.ca/proconline.html;
Franchi, E., Tosi, C., Scolla, G., Della Penna, G., Rodriguez, F., Pedroni, P.M., Metabolically engineered Rhodobacter sphaeroides RV strains for improved biohydrogen photoproduction combined with disposal of food wastes (2004) Mar. Biotechnol., 6, pp. 552-565;
Freedman, B., Catling, P.M., Lucas, Z., Effects of feral horses on vegetation of Sable Island, Nova Scotia (2011) Can. Field-Nat., 125, pp. 200-212;
Gassmann, A.J., Petzold-Maxwell, J.L., Clifton, E.H., Dunbar, M.W., Hoffmann, A.M., Ingber, D.A., Keweshan, R.S., Field-evolved resistance by western corn rootworm to multiple Bacillus thuringiensis toxins in transgenic maize (2014) Proc. Natl. Acad. Sci. U. S. A., 111, pp. 5141-5146;
Gilbert, N., A hard look at GM crops (2013) Nature, 497, pp. 24-26;
Gliddon, C., The impacts of hybrids between genetically modified crop plants and their related species-biological models and their perspectives (1994) Mol. Ecol., 3, pp. 41-44;
Golovan, S.P., Meidinger, R.G., Ajakaiye, A., Cottrill, M., Wiederkehr, M.Z., Barney, D.J., Plante, C., Forsberg, C.W., Pigs expressing salivary phytase produce low-phosphorus manure (2001) Nat. Biotechnol., 19, p. 741;
Griffiths, B.S., Caul, S., Thompson, J., Birch, A.N.E., Cortet, J., Andersen, M.N., Krogh, P.H., Microbial and microfaunal community structure in cropping systems with genetically modified plants (2007) Pedobiologia, 51, pp. 195-206;
Grime, J.P., Benefits of plant diversity to ecosystems: immediate, filter and founder effects (1998) J. Ecol., 86, pp. 902-910;
Haegele, J.W., Below, F.E., Transgenic corn rootworm protection increases grain yield and nitrogen use of maize (2013) Crop Sci., 53, pp. 585-594;
Haney, R.L., Senseman, S.A., Hons, F.M., Effect of roundup ultra on microbial activity and biomass from selected soils (2002) J. Environ. Qual., 31, pp. 730-735;
Hannula, S.E., de Boer, W., van Veen, J., A 3-year study reveals that plant growth stage, season and field site affect soil fungal communities while cultivar and GM-trait have minor effects (2012) PLoS One, 7, p. e33819. , 33810.31371/journal.pone.0033819;
Harker, K.N., O'Donovan, J.T., Blackshaw, R.E., Beckie, H.J., Mallory-Smith, C., Maxwell, B.D., Our view (2012) Weed Sci., 60, pp. 143-144;
Haro, M.A., de Lorenzo, V., Metabolic engineering of bacteria for environmental applications: construction of Pseudomonas strains for biodegradation of 2-chlorotoluene (2001) J. Biotechnol., 85, pp. 103-113;
Hawes, C., Haughton, A.J., Osborne, J.L., Roy, D.B., Clark, S.J., Perry, J.N., Rothery, P., Squire, G.R., Responses of plants and invertebrate trophic groups to contrasting herbicide regimes in the Farm Scale Evaluations of genetically modified herbicide tolerant crops (2003) Philo. Trans. R. Soc. Lond. Ser. B Biol. Sci., 358, pp. 1899-1913;
Heap, I., The international survey of herbicide resistant weeds (2014), http://www.weedscience.com, Accessed October 6th 2014Hegarty, R.S., Reducing rumen methane emissions through elimination of rumen protozoa (1999) Aust. J. Agric. Res., 50, pp. 1321-1327;
Herrero, O., Ramon, D., Orejas, M., Engineering the Saccharomyces cerevisiae isoprenoid pathway for de novo production of aromatic monoterpenes in wine (2008) Metab. Eng., 10, pp. 78-86;
Hew, C., Poon, R., Xiong, F., Gauthier, S., Shears, M., King, M., Davies, P., Fletcher, G., Liver-specific and seasonal expression of transgenic Atlantic salmon harboring the winter flounder antifreeze protein gene (1999) Transgenic Res., 8, pp. 405-414;
Hook, S.E., Wright, A.D.G., McBride, B.W., Methanogens: methane producers of the rumen and mitigation strategies (2010), ArchaeaIcoz, I., Stotzky, G., Fate and effects of insect-resistant Bt crops in soil ecosystems (2008) Soil Biol. Biochem., 40, pp. 559-586;
Itakura, M., Uchida, Y., Akiyama, H., Hoshino, Y.T., Shimomura, Y., Morimoto, S., Tago, K., Minamisawa, K., Mitigation of nitrous oxide emissions from soils by Bradyrhizobium japonicum inoculation (2013) Nat. Clim. Change, 3, pp. 208-212;
Joutsjoki, V., Luoma, S., Tamminen, M., Kilpi, M., Johansen, E., Palva, A., Recombinant Lactococcus starters as a potential source of additional peptidolytic activity in cheese ripening (2002) J. Appl. Microbiol., 92, pp. 1159-1166;
Kawata, M., Murakami, K., Ishikawa, T., Dispersal and persistence of genetically modified oilseed rape around Japanese harbors (2009) Environ. Sci. Pollut. Res., 16, pp. 120-126;
Kerovuo, J., Tynkkynen, S., Expression of Bacillus subtilis phytase in Lactobacillus plantarum 755 (2000) Lett. Appl. Microbiol., 30, pp. 325-329;
Konishi, K., Yonai, M., Kaneyama, K., Ito, S., Matsuda, H., Yoshioka, H., Nagai, T., Imai, K., Relationships of survival time, productivity and cause of death with telomere lengths of cows produced by somatic cell nuclear transfer (2011) J. Reprod. Dev., 57, pp. 572-578;
Lachnicht, S.L., Hendrix, P.F., Potter, R.L., Coleman, D.C., Crossley, D.A., Winter decomposition of transgenic cotton residue in conventional till and no-till systems (2004) Appl. Soil Ecol., 27, pp. 135-142;
Lai, L., Kang, J.X., Li, R., Wang, J., Witt, W.T., Yong, H.Y., Hao, Y., Dai, Y., Generation of cloned transgenic pigs rich in omega-3 fatty acids (2006) Nat. Biotechnol., 24, pp. 435-436;
Lau, W., Fischbach, M.A., Osbourn, A., Sattely, E.S., Key applications of plant metabolic engineering (2014) PLoS Biol, 12. , e1001879, doi: 1001810.1001371/journal.pbio.1001879;
Légère, A., Simard, M.J., Johnson, E., Stevenson, F.C., Beckie, H., Blackshaw, R.E., Control of volunteer canola with herbicides: effects of plant growth stage and cold acclimation (2006) Weed Technol., 20, pp. 485-493;
Li, L., Pitcher, T.J., Devlin, R.H., Potential risks of trophic impacts by escaped transgenic salmon in marine environments (2015) Environ. Conserv., 42, pp. 152-161;
Li, X.G., Liu, B.A., Cui, J.J., Liu, D.D., Ding, S.A., Gilna, B., Luo, J.Y., Han, Z.M., No evidence of persistent effects of continuously planted transgenic insect-resistant cotton on soil microorganisms (2011) Plant Soil, 339, pp. 247-257;
Lilley, A.K., Bailey, M.J., The acquisition of indigenous plasmids by a genetically marked pseudomonad population colonizing the sugar beet phytosphere is related to local environmental conditions (1997) Appl. Environ. Microbiol., 63, pp. 1577-1583;
Lilley, A.K., Bailey, M.J., Barr, M., Kilshaw, K., Timms-Wilson, T.M., Day, M.J., Norris, S.J., Godfray, H.C.J., Population dynamics and gene transfer in genetically modified bacteria in a model microcosm (2003) Mol. Ecol., 12, pp. 3097-3107;
Liu, J., Yan, G., Shu, C., Zhao, C., Liu, C., Song, F., Zhou, L., Huang, D., Construction of a Bacillus thuringiensis engineered strain with high toxicity and broad pesticidal spectrum against coleopteran insects (2010) Appl. Microbiol. Biotechnol., 87, pp. 243-249;
Liu, W., Lu, H.H., Wu, W., Wei, Q.K., Chen, Y.X., Thies, J.E., Transgenic Bt rice does not affect enzyme activities and microbial composition in the rhizosphere during crop development (2008) Soil Biol. Biochem., 40, pp. 475-486;
Lo, D., Pursel, V., Linton, P.J., Sandgren, E., Behringer, R., Rexroad, C., Palmiter, R.D., Brinster, R.L., Expression of mouse IgA by transgenic mice, pigs and sheep (1991) Eur. J. Immunol., 21, pp. 1001-1006;
Londo, J.P., Bollman, M.A., Sagers, C.L., Lee, E.H., Watrud, L.S., Changes in fitness-associated traits due to the stacking of transgenic glyphosate resistance and insect resistance in Brassica napus L (2011) Heredity, 107, pp. 328-337;
Londo, J.P., Bollman, M.A., Sagers, C.L., Lee, E.H., Watrud, L.S., Glyphosate-drift but not herbivory alters the rate of transgene flow from single and stacked trait transgenic canola (Brassica napus) to nontransgenic B. napusandB. rapa (2011) New Phyt., 191, pp. 840-849;
Londoño-R, L.M., Tarkalson, D., Thies, J.E., In field rates of decomposition and microbial communities colonizing residues vary by depth of residue placement and plant part, but not by crop genotype for residues from two Cry1Ab Bt corn hybrids and their non-transgenic isolines (2013) Soil Biol. Biochem., 57, pp. 349-355;
Lu, H.H., Wu, W.X., Chen, Y.X., Zhang, X.J., Devare, M., Thies, J.E., Decomposition of Bt transgenic rice residues and response of soil microbial community in rapeseed-rice cropping system (2010) Plant Soil, 336, pp. 279-290;
Lu, Y.H., Wu, K.M., Jiang, Y.Y., Xia, B., Li, P., Feng, H.Q., Wyckhuys, K.A.G., Guo, Y.Y., Mirid bug outbreaks in multiple crops correlated with wide scale adoption of Bt cotton in China (2010) Science, 328, pp. 1151-1154;
Lupwayi, N.Z., Hanson, K.G., Harker, K.N., Clayton, G.W., Blackshaw, R.E., O'Donovan, J.T., Johnson, E.N., Monreal, M.A., Soil microbial biomass, functional diversity and enzyme activity in glyphosate-resistant wheat-canola rotations under low-disturbance direct seeding and conventional tillage (2007) Soil Biol. Biochem., 39, pp. 1418-1427;
Lyall, J., Irvine, R.M., Sherman, A., McKinley, T.J., Nunez, A., Purdie, A., Outtrim, L., Tiley, L., Suppression of avian influenza transmission in genetically modified chickens (2011) Science, 331, pp. 223-226;
Marshall, J.M., The cartagena protocol and genetically modified mosquitoes (2010) Nat. Biotechnol., 28, pp. 896-897;
Marvier, M., Using meta-analysis to inform risk assessment and risk management (2011) J. Consum. Prot. Food Saf., 6, pp. 113-118;
Medeiros, E., Phelps, M., Fuentes, F., Bradley, T., Overexpression of follistatin in trout stimulates increased muscling (2009) Am. J. Physiol. Regul. Integr. Comp. Physiol., 297, pp. R235-R242;
(2014), http://www.monsanto.com/products/pages/refuge.aspx, Accessed October 6th 2014(2014), http://www.monsanto.com/products/pages/refuge-in-the-bag-corn-products.aspx, Accessed October 6th 2014Mortensen, D.A., Egan, J.F., Maxwell, B.D., Ryan, M.R., Smith, R.G., Navigating a critical juncture for sustainable weed management (2012) Bioscience, 62, pp. 75-84;
Motavalli, P.P., Kremer, R.J., Fang, M., Means, N.E., Impact of genetically modified crops and their management on soil microbially mediated plant nutrient ransformations (2004) J. Environ. Qual., 33, pp. 816-824;
Mozdziak, P.E., Pophal, S., Borwornpinyo, S., Petitte, J.N., Transgenic chickens expressing beta-galactosidase hydrolyze lactose in the intestine (2003) J. Nutr., 133, pp. 3076-3079;
Mueller, N.D., Gerber, J.S., Johnston, M., Ray, D.K., Ramankutty, N., Foley, J.A., Closing yield gaps through nutrient and water management (2012) Nature, 490, pp. 254-257;
Mungai, N.W., Motavalli, P.P., Nelson, K.A., Kremer, R.J., Differences in yields, residue composition and N mineralization dynamics of Bt and non- Bt maize (2005) Nutr. Cycl. Agroecosyst., 73, pp. 101-109;
Naik, G., Qaim, M., Subramanian, A., Zilberman, D., Bt cotton controversy: some paradoxes explained (2005) Econ. Polit. Wkly., 40, pp. 1514-1517;
Nam, Y.K., Maclean, N., Hwang, G., Kim, D.S., Autotransgenic and allotransgenic manipulation of growth traits in fish for aquaculture: a review (2008) J. Fish Biol., 72 (1), pp. 1-26;
Naranjo, S.E., Impacts of Bt transgenic cotton on integrated pest management (2011) J. Agric. Food Chem., 59, pp. 5842-5851;
Nottle, M.B., Nagashima, H., Verma, P.J., Du, Z.T., Grupen, C.G., McIlfatrick, S.M., Ashman, R.J., Robins, A.J., Production and analysis of transgenic pigs containing a metallothionein porcine growth hormone gene construct (1999) Transgenic Animals in Agriculture, pp. 145-156. , CABI, Wallingford, J.D. Murray, G.B. Anderson, A.M. Oberbauer, M.M. McGloughlin (Eds.);
Oh, Y.K., Raj, S.M., Jung, G.Y., Park, S., Current status of the metabolic engineering of microorganisms for biohydrogen production (2011) Bioresour. Technol., 102, pp. 8357-8367;
Philippot, L., Hallin, S., Towards food, feed and energy crops mitigating climate change (2011) Trends Plant Sci., 16, pp. 476-480;
Philippot, L., Kuffner, M., Cheneby, D., Depret, G., Laguerre, G., Martin-Laurent, F., Genetic structure and activity of the nitrate-reducers community in the rhizosphere of different cultivars of maize (2006) Plant Soil, 287, pp. 177-186;
Phillips, J.P., Golovan, S.P., Meidinger, R.G., Forsberg, C.W., Transgenic enhancement of nutrient cycling: moving toward an environmentally sustainable animal agriculture, Proceedings of the 8th World Congress on Genetics Applied to Livestock Production, Belo Horizonte, Minas Gerais, Brazil, 13-18 August, 2006 (2006), pp. 19-20. , Instituto Prociencia, Minas GeraisPleasants, J.M., Oberhauser, K.S., Milkweed loss in agricultural fields because of herbicide use: effect on the monarch butterfly population (2013) Insect Conserv. Divers., 6, pp. 135-144;
Pursel, V.G., Sutrave, P., Wall, R.J., Kelly, A.M., Hughes, S.H., Transfer of C-Ski gene into swine to enhance muscle development (1992) Theriogenology, 37, p. 278;
Ramsay, G., Thompson, C., Squire, G., Quantifying landscape-scale gene flow in oilseed rape (2003), Department for Environment, Food and Rural Affairs; LondonRanathunge, K., El-Kereamy, A., Gidda, S., Bi, Y.M., Rothstein, S.J., AMT11 transgenic rice plants with enhanced NH<inf>4</inf> permeability show superior growth and higher yield under optimal and suboptimal NH<inf>4</inf> conditions (2014) J. Exp. Bot., 65, pp. 965-979;
Ray, D.K., Ramankutty, N., Mueller, N.D., West, P.C., Foley, J.A., Recent patterns of crop yield growth and stagnation (2012), 3, p. 1293. , Nat. Commun, doi: 1210.1038/ncomms2296Reeves, R.G., Denton, J.A., Santucci, F., Bryk, J., Reed, F.A., Scientific standards and the regulation of genetically modified insects (2012) PLoS Negl. Trop. Dis, 6, p. e1502. , doi: 1510.1371/journal.pntd.0001502;
Reh, W.A., Maga, E.A., Collette, N.M., Moyer, A., Conrad-Brink, J.S., Taylor, S.J., DePeters, E.J., Murray, J.D., Hot topic: using a stearoyl-CoA desaturase transgene to alter milk fatty acid composition (2004) J. Dairy Sci., 87, pp. 3510-3514;
Richardson, D., Felgate, H., Watmough, N., Thomson, A., Baggs, E., Mitigating release of the potent greenhouse gas N<inf>2</inf>O from the nitrogen cycle-could enzymic regulation hold the key? (2009) Trends Biotechnol., 27, pp. 388-397;
Richt, J.A., Kasinathan, P., Hamir, A.N., Castilla, J., Sathiyaseelan, T., Vargas, F., Sathiyaseelan, J., Kuroiwa, Y., Production of cattle lacking prion protein (2007) Nat. Biotechnol., 25, pp. 132-138;
Ripp, S., Nivens, D.E., Ahn, Y., Werner, C., Jarrell, J., Easter, J.P., Cox, C.D., Sayler, G.S., Controlled field release of a bioluminescent genetically engineered microorganism for bioremediation process monitoring and control (2000) Environ. Sci. Technol., 34, pp. 846-853;
Ross, E.M., Moate, P.J., Marett, L., Cocks, B.G., Hayes, B.J., Investigating the effect of two methane-mitigating diets on the rumen microbiome using massively parallel sequencing (2013) J. Dairy Sci., 96. , 1-17;
Saeki, K., Matsumoto, K., Kinoshita, M., Suzuki, I., Tasaka, Y., Kano, K., Taguchi, Y., Iritani, A., Functional expression of a Delta12 fatty acid desaturase gene from spinach in transgenic pigs (2004) Proc. Natl. Acad. Sci. U. S. A, 101, pp. 6361-6366;
Salter, D.W., Crittenden, L.B., Artificial insertion of a dominant gene for resistance to avian leukosis virus into the germ line of the chicken (1989) Theor. Appl. Genet., 77. , 457-461;
Sarkar, B., Patra, A.K., Purakayastha, T.J., Transgenic Bt -cotton affects enzyme activity and nutrient availability in a sub-tropical inceptisol (2008) J. Agron. Crop Sci., 194, pp. 289-296;
Schafer, M.G., Ross, A.A., Londo, J.P., Burdick, C.A., Lee, E.H., Travers, S.E., Van de Water, P.K., Sagers, C.L., The establishment of genetically engineered Canola populations in the US (2011) PLoS One, 6, p. e25736. , doi: 25710.21371/journal.pone.0025736;
Scharfen, E.C., Mills, D.A., Maga, E.A., Use of human lysozyme transgenic goat milk in cheese making: effects on lactic acid bacteria performance (2007) J. Dairy Sci., 90, pp. 4084-4091;
Schmalenberger, A., Tebbe, C.C., Genetic profiling of noncultivated bacteria from the rhizospheres of sugar beet (Beta vulgaris) reveal field and annual variability but no effect of a transgenic herbicide resistance (2003) Can. J. Microbiol., 49, pp. 1-8;
Schwartz, M.W., Brigham, C.A., Hoeksema, J.D., Lyons, K.G., Mills, M.H., van Mantgem, P.J., Linking biodiversity to ecosystem function: implications for conservation ecology (2000) Oecologia, 122, pp. 297-305;
Schwieger, F., Tebbe, C.C., Effect of field inoculation with Sinorhizobium meliloti L33 on the composition of bacterial communities in rhizospheres of a target plant (Medicago sativa) and a non-target plant (Chenopodium album)-linking of 16S rRNA gene-based single-strand conformation polymorphism community profiles to the diversity of cultivated bacteria (2000) Appl. Environ. Microbiol, 66, pp. 3556-3565;
Sessitsch, A., Gyamfi, S., Tscherko, D., Gerzabek, M.H., Kandeler, E., Activity of microorganisms in the rhizosphere of herbicide treated and untreated transgenic glufosinate-tolerant and wildtype oilseed rape grown in containment (2004) Plant Soil, 266, pp. 105-116;
Sester, M., Darmency, H., Colbach, N., Contribution of groundkeepers vs. weed beet to gene escape from sugar beet (Beta vulgaris spp.). Consequences for growing genetically-modified sugar beet-a modelling approach (2012) Field Crop. Res., 135, pp. 46-57;
Shen, R.F., Cai, H., Gong, W.H., Transgenic Bt cotton has no apparent effect on enzymatic activities or functional diversity of microbial communities in rhizosphere soil (2006) Plant Soil, 285, pp. 149-159;
Shi, G.M., Chavas, J.P., Lauer, J., Commercialized transgenic traits, maize productivity and yield risk (2013) Nat. Biotechnol., 31, pp. 111-114;
Shintani, M., Matsui, K., Inoue, J., Hosoyama, A., Ohji, S., Yamazoe, A., Nojiri, H., Ohkuma, M., Single-cell analyses revealed transfer ranges of IncP-1, IncP-7, and IncP-9 plasmids in a soil bacterial community (2014) Appl. Environ. Microbiol., 80, pp. 138-145;
Shu, Y.H., Ma, H.H., Du, Y., Li, Z.X., Feng, Y.J., Wang, J.W., The presence of Bacillus thuringiensis (Bt) protein in earthworms Eisenia fetida has no deleterious effects on their growth and reproduction (2011) Chemosphere, 85, pp. 1648-1656;
Skot, L., Harrison, S.P., Nath, A., Mytton, L.R., Clifford, B.C., Expression of insecticidal activity in Rhizobium containing the delta-endotoxin gene cloned from Bacillus thuringiensis subsp. tenebrionis (1990) Plant Soil, 127, pp. 285-295;
Squire, G.R., Breckling, B., Dietz, P., feilstetter, A., Jørgensen, R.B., Lecomte, J., Pivard, S., Young, M.W., Status of feral oilseed rape in Europe: its minor role as a GM impurity and its potential as a reservoir of transgene persistence (2011) Environ. Sci. Pollut. Res., 18, pp. 111-115;
Squire, G.R., Brooks, D.R., Bohan, D.A., Champion, G.T., Daniels, R.E., Haughton, A.J., Hawes, C., Firbank, L.G., On the rationale and interpretation of the farm scale evaluations of genetically modified herbicide-tolerant crops (2003) Philo. Trans. R. Soc. Lond. Ser. B Biol. Sci., 358, pp. 1779-1799;
Steinfeld, H., Gerber, P., Wassenaar, T., Castel, V., Rosales, M., de Haan, C., (2006) Livestock's long shadow, , United Nations Food and Agriculture Organization, Rome;
Subbarao, G.V., Ishikawa, T., Ito, O., Nakahara, K., Wang, H.Y., Berry, W.L., A biolumiuescence assay to detect nitrification inhibitors released from plant roots: a case study with Brachiaria humidicola (2006) Plant Soil, 288, pp. 101-112;
Subbarao, G.V., Nakahara, K., Hurtado, M.P., Ono, H., Moreta, D.E., Salcedo, A.F., Yoshihashi, A.T., Ito, O., Evidence for biological nitrification inhibition in Brachiaria pastures (2009) Proc. Natl. Acad. Sci. U. S. A., 106, pp. 17302-17307;
Subbarao, G.V., Tomohiro, B., Masahiro, K., Osamu, I., Samejima, H., Wang, H.Y., Pearse, S.J., Berry, W.L., Can biological nitrification inhibition (BNI) genes from perennial Leymus racemosus (Triticeae) combat nitrification in wheat farming? (2007) Plant Soil, 299, pp. 55-64;
Sundström, L.F., Lohmus, M., Devlin, R.H., Migration and growth potential of coho salmon smolts: implications for ecological impacts from growth-enhanced fish (2010) Ecol. Appl., 20, pp. 1372-1383;
Sutton, M.A., Oenema, O., Erisman, J.W., Leip, A., van Grinsven, H., Winiwarter, W., Too much of a good thing (2011) Nature, 472, pp. 159-161;
Swan, C.M., Jensen, P.D., Dively, G.P., Lamp, W.O., Processing of transgenic crop residues in stream ecosystems (2009) J. Appl. Ecol., 46, pp. 1304-1313;
Sybesma, W., van den Born, E., Starrenburg, M., Mierau, I., Kleerebezem, M., de Vos, W.M., Hugenholtz, J., Controlled modulation of folate polyglutamyl tail length by metabolic engineering of Lactococcus lactis (2003) Appl. Environ. Microbiol., 69, pp. 7101-7107;
Tabashnik, B.E., Brevault, T., Carriere, Y., Insect resistance to Bt crops: lessons from the first billion acres (2013) Nat. Biotechnol., 31, pp. 510-521;
Tabashnik, B.E., Sisterson, M.S., Ellsworth, P.C., Dennehy, T.J., Antilla, L., Liesner, L., Whitlow, M., Carriere, Y., Suppressing resistance to Bt cotton with sterile insect releases (2010) Nat. Biotechnol., 28, pp. 1304-1309;
Thomas, D.D., Donnelly, C.A., Wood, R.J., Alphey, L.S., Insect population control using a dominant, repressible, lethal genetic system (2000) Science, 287, pp. 2474-2476;
Timms-Wilson, T.M., Ellis, R.J., Renwick, A., Rhodes, D.J., Mavrodi, D.V., Weller, D.M., Thomashow, L.S., Bailey, M.J., Chromosomal insertion of phenazine-1-carboxylic acid biosynthetic pathway enhances efficacy of damping-off disease control by Pseudomonas fluorescens (2000) Mol. Plant Microbe Interact., 13, pp. 1293-1300;
Tong, J., Wei, H., Liu, X., Hu, W., Bi, M., Wang, Y., Li, Q., Li, N., Production of recombinant human lysozyme in the milk of transgenic pigs (2011) Transgenic Res., 20, pp. 417-419;
Udayasuriyan, V., Nakamura, A., Masaki, H., Uozumi, T., Transfer of an insecticidal protein gene of Bacillus thuringiensis into plant-colonizing Azospirillum (1995) World J. Microbiol. Biotechnol., 11, pp. 163-167;
Valls, M., Atrian, S., de Lorenzo, V., Fernandez, L.A., Engineering a mouse metallothionein on the cell surface of Ralstonia eutropha CH34 for immobilization of heavy metals in soil (2000) Nat. Biotechnol., 18, pp. 661-665;
van Dillewijn, P., Soto, M.J., Villadas, P.J., Toro, N., Construction and environmental release of a Sinorhizobium meliloti strain genetically modified to be more competitive for alfalfa nodulation (2001) Appl. Environ. Microbiol., 67, pp. 3860-3865;
van Dillewijn, P., Villadas, P.J., Toro, N., Effect of a Sinorhizobium meliloti strain with a modified putA gene on the rhizosphere microbial community of alfalfa (2002) Appl. Environ. Microbiol., 68, pp. 4201-4208;
Vauramo, S., Pasonen, H.L., Pappinen, A., Setala, H., Decomposition of leaf litter from chitinase transgenic silver birch (Betula pendula) and effects on decomposer populations in a field trial (2006) Appl. Soil Ecol., 32, pp. 338-349;
Verwaal, R., Wang, J., Meijnen, J.-P., Visser, H., Sandmann, G., van den Berg, J.A., van Ooyen, A.J.J., High-level production of beta-carotene in Saccharomyces cerevisiae by successive transformation with carotenogenic genes from Xanthophyllomyces dendrorhous (2007) Appl. Environ. Microbiol., 73, pp. 4342-4350;
Vicedo, B., Penalver, R., Asins, M.J., Lopez, M.M., Biological control of Agrobacterium tumefaciens, colonization, and pAgK48 transfer with Agrobacterium radiobacter K84 and the Tra-mutant K1060 (1993) Appl. Environ. Microbiol., 59, pp. 309-315;
Wall, R.J., Powell, A.M., Paape, M.J., Kerr, D.E., Bannerman, D.D., Pursel, V.G., Wells, K.D., Hawk, H.W., Genetically enhanced cows resist intramammary Staphylococcus aureus infection (2005) Nat. Biotechnol., 23, pp. 445-451;
Wan, S., Johnson, A.M., Altosaar, I., Expression of nitrous oxide reductase from Pseudomonas stutzeri in transgenic tobacco roots using the root-specific rolD promoter from Agrobacterium rhizogenes (2012) Ecol. Evol, 2, pp. 286-297;
Wang, C.X., Knill, E., Glick, B.R., Defago, G., Effect of transferring 1-aminocyclopropane-1-carboxylic acid (ACC) deaminase genes into Pseudomonas fluorescens strain CHA0 and its gacA derivative CHA96 on their growth-promoting and disease-suppressive capacities (2000) Can. J. Microbiol., 46, pp. 898-907;
Warwick, S.I., Legere, A., Simard, M.J., James, T., Do escaped transgenes persist in nature? The case of an herbicide resistance transgene in a weedy Brassica rapa population (2008) Mol. Ecol., 17, pp. 1387-1395;
Watrud, L.S., King, G., Londo, J.P., Colasanti, R., Smith, B.M., Waschmann, R.S., Lee, E.H., Changes in constructed Brassica communities treated with glyphosate drift (2011) Ecol. Appl., 21, pp. 525-538;
Weih, M., Trade-offs in plants and the prospects for breeding using modern biotechnology (2003) New Phyt., 158, pp. 7-9;
Weih, M., Didon, U.M.E., Rönnberg-Wästljung, A.C., Böjrkman, C., Integrated agricultural research and crop breeding: allelopathic weed control in cereals and long-term productivity in perennial bionmass crops (2008) Agric. Syst., 97, pp. 99-107;
Weih, M., Hoeber, S., Beyer, F.P.F., Traits to ecosystems: the ecological sustainability challenge when developing future energy crops (2014) Front. Energy Res., 2, p. 17;
Whitham, T.G., Bailey, J.K., Schweitzer, J.A., Shuster, S.M., Bangert, R.K., Leroy, C.J., Lonsdorf, E.V., Wooley, S.C., A framework for community and ecosystem genetics: from genes to ecosystems (2006) Nat. Rev. Genet., 7, pp. 510-523;
Wimmer, E.A., Applications of insect transgenesis (2003) Nat. Rev. Genet., 4, pp. 225-232;
Wu, X., Ouyang, H., Duan, B., Pang, D., Zhang, L., Yuan, T., Xue, L., Li, G.P., Production of cloned transgenic cow expressing omega-3 fatty acids (2012) Transgenic Res., 21, pp. 537-543;
Xu, Z., Hennessy, D.A., Sardana, K., Moschini, G., The realized yield effect of genetically engineered crops: US maize and soybean (2013) Crop Sci., 53, pp. 735-745;
Yang, B., Wang, J., Tang, B., Liu, Y., Guo, C., Yang, P., Yu, T., Li, N., Characterization of bioactive recombinant human lysozyme expressed in milk of cloned transgenic cattle (2011) PLoS One, 6, p. e17593;
Yanni, S.F., Whalen, J.K., Ma, B.L., Crop residue chemistry, decomposition rates, and CO<inf>2</inf> evolution in Bt and non- Bt corn agroecosystems in North America: a review (2010) Nutr. Cycl. Agroecosyst., 87, pp. 277-293;
Zapiola, M.L., Campbell, C.K., Butler, M.D., Mallory-Smith, C.A., Escape and establishment of transgenic glyphosate-resistant creeping bentgrass Agrostis stolonifera in Oregon, USA: a 4-year study (2008) J. Appl. Ecol., 45, pp. 486-494;
Zapiola, M.L., Mallory-Smith, C.A., Crossing the divide: gene flow produces intergeneric hybrid in feral transgenic creeping bentgrass population (2012) Mol. Ecol., 21, pp. 4672-4680;
Zeller, S.L., Kalinina, O., Brunner, S., Keller, B., Schmid, B., Transgene x environment interactions in genetically modified wheat (2010) PLoS One, 5. , e11405, doi: 11410.11371/journal.pone.0011405;
Zhang, H.N., Tian, W., Zhao, J., Jin, L., Yang, J., Liu, C.H., Yang, Y.H., Wu, Y.D., Diverse genetic basis of field-evolved resistance to Bt cotton in cotton bollworm from China (2012) Proc. Natl. Acad. Sci. U. S. A., 109, pp. 10275-10280;
Zhao, J.H., Ho, P., Azadi, H., Benefits of Bt cotton counterbalanced by secondary pests? Perceptions of ecological change in China (2011) Environ. Monit. Assess., 173, pp. 985-994;
Zilberman, D., Sexton, S.E., Marra, M., Fernandez-Cornejo, F., The economic impact of genetically engineered crops (2010) Choices Mag. Food Farm Resour., (2). , Issues 25
KW  - Agriculture
KW  - Animalia
KW  - Bacillus thuringiensis
KW  - Bacillus thuringiensis (Bt)
KW  - Biotechnology
KW  - Ecosystem processes
KW  - Ecosystem services
KW  - Herbicide-tolerant (HT)
ER  - 

TY  - JOUR
TI  - Rice and duck, a good combination? Identifying the incentives and triggers for joint rice farming and wild duck conservation
AU  - Pernollet, C.A.
AU  - Simpson, D.
AU  - Gauthier-Clerc, M.
AU  - Guillemain, M.
T2  - Agriculture, Ecosystems and Environment
DA  - 2015///
PY  - 2015
DO  - 10.1016/j.agee.2015.08.018
VL  - 214
SP  - 118
EP  - 132
UR  - http://www.scopus.com/inward/record.url?eid=2-s2.0-84941895755&partnerID=40&md5=290a8de4d909b6840a1641ee022a5017
DB  - Scopus
N1  - <p>CODEN: AEEND</p>
N1  - <p>CODEN: AEEND</p>
N1  - <p>CODEN: AEEND</p>
N1  - <p>CODEN: AEEND</p>
N1  - <p>Correspondence Address: Pernollet, C.A.; Office National de la Chasse et de la Faune Sauvage, CNERA Avifaune migratrice, La Tour du ValatFrance</p>
N1  - <p>Correspondence Address: Pernollet, C.A.; Office National de la Chasse et de la Faune Sauvage, CNERA Avifaune migratrice, La Tour du ValatFrance</p>
N1  - <p>Correspondence Address: Pernollet, C.A.; Office National de la Chasse et de la Faune Sauvage, CNERA Avifaune migratrice, La Tour du ValatFrance</p>
N1  - <p>Correspondence Address: Pernollet, C.A.; Office National de la Chasse et de la Faune Sauvage, CNERA Avifaune migratrice, La Tour du ValatFrance</p>
N1  - <p>Export Date: 2 December 2015</p>
N1  - <p>Export Date: 2 December 2015</p>
N1  - <p>Export Date: 2 December 2015</p>
N1  - <p>Export Date: 2 December 2015</p>
N1  - <p>Export Date: 2 December 2015</p>
N1  - <p>Export Date: 2 December 2015</p>
N1  - <p>Export Date: 2 December 2015</p>
N1  - <p>Export Date: 2 December 2015</p>
N1  - <p>Export Date: 2 December 2015</p>
N1  - <p>Export Date: 3 December 2015</p>
N1  - <p>Export Date: 21 December 2015</p>
N1  - <p>Export Date: 21 December 2015</p>
N1  - <p>References: Acosta, M., Mugica, L., Blanco, D., López-Lanús, B., Dias, R.A., Doodnath, L.W., Hurtado, J., Birds of rice fields in the Americas (2010) Waterbirds, 33, pp. 105-122; <br/>Adzitey, F., Adzitey, S., Duck production: Has a potential to reduce poverty among rural households in Asian communities-a review (2011) Worlds Poult. Res., 1, pp. 7-10;<br/>Ahmadi, N., Bouman, B., Riz et rizicultures, enjeux économiques, écologiques et scientifiques (2013) Cah. Agric., 22, pp. 333-335;<br/>Amano, T., Ushiyama, K., Fujita, G., Higuchi, H., Factors affecting rice grain density unconsumed by white-fronted geese in relation to wheat damage (2004) Agric. Ecosyst. Environ., 102, pp. 403-407;<br/>Amano, T., Ushiyama, K., Moriguchi, S., Fujita, G., Higuchi, H., Decision-making in group foragers with incomplete information: test of individual-based model in geese (2006) Ecol. Monogr., 76, pp. 601-616;<br/>Amano, T., Kusumoto, Y., Tokuoka, Y., Yamada, S., Kim, E.-Y., Yamamoto, S., Spatial and temporal variations in the use of rice-paddy dominated landscapes by birds in Japan (2008) Biol. Conserv., 141, pp. 1704-1716;<br/>Amano, T., Kusumoto, Y., Okamura, H., Baba, Y.G., Hamasaki, K., Tanaka, K., Yamamoto, S., A macro-scale perspective on within farm management: how climate and topography alter the effect of farming practices (2011) Ecol. Lett., 14, pp. 1263-1272;<br/>Amano, T., Avian responses to heterogeneity in rice fields at local, landscape and macro scales (2014) Ornithol. Sci., 7;<br/>Anders, M.M., Van Kessel, K., Eadie, J.M., Agronomic impacts of winter wetland and waterfowl management in ricelands (2008) Conservation in Ricelands of North America, pp. 91-117. , The Rice Foundation, Stuttgart, Arkansas, S.W. Manley (Ed.);<br/>Arzel, C., Guillemain, M., Gurd, D., Elmberg, J., Fritz, H., Arnaud, A., Pin, C., Bosca, F., Experimental functional response and inter-individual variation in foraging rate of teal (Anas crecca) (2007) Behav. Process., 75, pp. 66-71;<br/>Baki, B., Chin, D., Mortimer, M., (2000) Wild and Weedy Rice in Rice Ecosystems in Asia-A Review, , International Rice Research Institute;<br/>Baldassarre, G.A., Bolen, E.G., Field-feeding ecology of waterfowl wintering on the Southern High Plains of Texas (1984) J. Wildl. Manag., 48, pp. 63-71;<br/>Balmford, A., Green, R., Phalan, B., What conservationists need to know about farming (2012) Proc. R. Soc. B, 279, pp. 2714-2724;<br/>Barroga, R., Gicana, N., Barroga, A., Socio-economic evaluation of rice-duck farming system in Bukidnon (2007) Philipp. J. Vet. Anim. Sci., 33, pp. 47-72;<br/>Batzer, D.P., Resh, V., Wetland management strategies that enhance waterfowl habitats can also control mosquitoes (1992) J. Am. Mosq. Control Assoc., 8, pp. 117-125;<br/>Bellio, M., Kingsford, R., Kotagama, S., Natural versus artificial-wetlands and their waterbirds in Sri Lanka (2009) Biol. Conserv., 142, pp. 3076-3085;<br/>Bird, J., Pettygrove, G., Eadie, J., The impact of waterfowl foraging on the decomposition of rice straw: mutual benefits for rice growers and waterfowl (2000) J. Appl. Ecol., 37, pp. 728-741;<br/>Bird, J., Eagle, A., Horwath, W., Hair, M., Zilbert, E., van Kessel, C., Long-term studies find benefits, challenges in alternative rice straw management (2002) Calif. Agric., 56, pp. 69-75;<br/>Important Bird Areas factsheet: Jakhaly rice-fields (2014), accessed October 2014Important Bird Areas factsheet: Doho Rice Scheme (2014), Accessed October 2014Blanco, D.E., López-Lanús, B., Dias, R.A., Azpiroz, A., Rilla, F., (2006) Uso de arroceras por chorlos y playeros migratorios en el sur de América del Sur. Implicancias de conservación y manejo, , Wetlands International, Buenos Aires, Argentina;<br/>Brochet, A.-L., Guillemain, M., Fritz, H., Gauthier-Clerc, M., Green, A.J., The role of migratory ducks in the long-distance dispersal of native plants and the spread of exotic plants in Europe (2009) Ecography, 32, pp. 298-919;<br/>Brochet, A.-L., Gauthier-Clerc, M., Mathevet, R., Béchet, A., Mondain-Monval, J.-Y., Tamisier, A., Marsh management, reserve creation, hunting periods and carrying capacity for wintering ducks and coots (2009) Biodivers. Conserv., 18, pp. 1879-1894;<br/>Brochet, A.-L., Guillemain, M., Gauthier-Clerc, M., Fritz, H., Green, A.J., Endozoochory of Mediterranean aquatic plant seeds by teal after a period of desiccation: determinants of seed survival and influence of retention time on germinability and viability (2010) Aquat. Bot., 93, pp. 99-106;<br/>Brochet, A.-L., Mouronval, J.-B., Aubry, P., Gauthier-Clerc, M., Green, A.J., Fritz, H., Guillemain, M., Diet and feeding habitats of camargue dabbling ducks: what has changed since the 1960? (2012) Waterbirds, 35, pp. 555-576;<br/>Brogi, A., Pernollet, C.A., Gauthier-Clerc, M., Guillemain, M., Waterfowl foraging in winter-flooded rice fields: any agronomic benefits for farmers? (2015) Ambio, , (in press);<br/>Buler, J.J., Barrow, W.C., Randall, L., (2010) An Assessment of Wintering Waterfowl Use of Wetland Reserve Program Restored Wetlands in California Using NEXRAD Weather Radar: Final Report, , Final report to Natural Resources Conservation Service;<br/>Byun, C., Kwon, G.J., Lee, D., Wojdak, J.M., Kim, J.G., Ecological assessment of plant succession and water quality in abandoned rice fields (2008) J. Ecol. Field Biol., 31, pp. 213-223;<br/>Bywater, V., Ribot, R., Buttemer, B., Bennett, A.T.D., Waterfowl utilize different habitat at night: implications for conservation (2014) Ornithol. Sci., 27;<br/>COLTIVAZIONE RISO NATURALE dalla parte della biodiversita (24'). Progetto finanziato nell'ambito del programma regionale di ricerca in campo agricolo 2007-2010 (2010) Regione Lombardia Direzione GeneraleAgricoltura, , Una realizzanione White Fox;<br/>Chamberlain, D.E., Crick, H.Q., Population declines and reproductive performance of skylarks Alauda arvensis in different regions and habitats of the United Kingdom (1999) Ibis, 141, pp. 38-51;<br/>Chan, S.-F., Severinghaus, L.L., Lee, C.-K., The effect of rice field fragmentation on wintering waterbirds at the landscape level (2007) J. Ornithol., 148, pp. 333-342;<br/>Cheng-fang, L., Cou-gui, C., Jin-ping, W., Ming, Z., Wei-ling, Y., Ahmad, S., Nitrogen losses from integrated rice-duck and rice-fish ecosystems in southern China (2008) Plant Soil, 307, pp. 207-217;<br/>Choi, J.H., Yoo, J.C., Use of rice fields by bean geese Anser fabalis and white-fronted geese Anser albifrons wintering in Hangang River Estuary according to post-harvest treatment (2014) Ornithol. Sci., 612;<br/>Comín, F.A., Romero, J.A., Hernández, O., Menéndez, M., Restoration of wetlands from abandoned rice fields for nutrient removal, and biological community and landscape diversity (2001) Restor. Ecol., 9, pp. 201-208;<br/>Cox, R.R., Afton, A.D., Use of habitats by female northern pintails wintering in southwestern Louisiana (1997) J. Wildl. Manag., 61, pp. 435-443;<br/>Czech, H.A., Parsons, K.C., Agricultural wetlands and waterbirds: a review (2002) Waterbirds, pp. 56-65;<br/>Davidson, N.C., How much wetland has the world lost? Long-term and recent trends in global wetland area (2014) Mar. Freshwater Res., 65, pp. 934-941;<br/>Day, J.H., Colwell, M.A., Waterbird communities in rice fields subjected to different post-harvest treatments (1998) Colon. Waterbird, 21, pp. 185-197;<br/>De Grazio, J.W., World bird damage problems (1978) Proceedings of 8th Vertebrate Pest Conference, pp. 9-24. , Davis, California, W.E. Howard (Ed.);<br/>De Mey, Y., Demont, M., Diagne, M., Estimating bird damage to rice in Africa: evidence from the Senegal River Valley (2012) J. Agric. Econ., 63, pp. 175-200;<br/>De Vlaming, V., Proctor, V.W., Dispersal of aquatic organisms: viability of seeds recovered from the droppings of captive killdeer and mallard ducks (1968) Am. J. Bot., 55, pp. 20-26;<br/>Dessborn, L., Brochet, A., Elmberg, J., Legagneux, P., Gauthier-Clerc, M., Guillemain, M., Geographical and temporal patterns in the diet of pintail Anas acuta, wigeon Anas penelope, mallard Anas platyrhynchos and teal Anas crecca in the Western Palearctic (2011) Eur. J. Wildl. Res., 57, pp. 1119-1129;<br/>Movements and resource utilization of four species of ducks captured in the mid-Parana River Basin, Corrientes Province, Argentina (2012) Final Report Submitted to Tudor Farms, Cambridge, Maryland, USA;<br/>Donald, P., Green, R., Heath, M., Agricultural intensification and the collapse of Europe's farmland bird populations (2001) Proc. R. Soc. B, 268, pp. 25-29;<br/>Donald, P.F., Biodiversity impacts of some agricultural commodity production systems (2004) Conserv. Biol., 18, pp. 17-38;<br/>Dufumier, M., Les systèmes de riziculture alternatifs dans le monde (2012) Les dossiers de conférence. 1ère conférence internationale. Les systèmes de production rizicole biologique. 27-30 aot 2012, pp. 27-31. , Montpellier, France, INRA (Ed.);<br/>Duncan, P., Hewison, A., Houte, S., Rosoux, R., Tournebize, T., Dubs, F., Burel, F., Bretagnolle, V., Long-term changes in agricultural practices and wildfowling in an internationally important wetland, and their effects on the guild of wintering ducks (1999) J. Appl. Ecol., 36, pp. 11-23;<br/>Durham, R.S., Afton, A.D., Nest-site selection and success of mottled ducks on agricultural lands in southwest Louisiana (2003) Wildl. Soc. Bull., 31, pp. 433-442;<br/>Eadie, J., Elphick, C., Reinecke, K., Miller, M., Manley, S., Wildlife values of North American ricelands (2008) Conservation in Ricelands of North America, pp. 7-90. , The Rice Foundation, Stuttgart, Arkansas, S.W. Manley (Ed.);<br/>Elphick, C.S., Oring, L.W., Conservation implications of flooding rice fields on winter waterbird communities (2003) Agric. Ecosyst. Environ., 94, pp. 17-29;<br/>Elphick, C.S., Baicich, P., Parsons, K.C., Fasola, M., Mugica, L., The future for research on waterbirds in rice fields (2010) Waterbirds, 33, pp. 231-243;<br/>Elphick, C.S., Taft, O., Lourenço, P.M., Management of rice fields for birds during the non-growing season (2010) Waterbirds, 33, pp. 181-192;<br/>Elphick, C.S., Assessing conservation trade-offs: identifying the effects of flooding rice fields for waterbirds on non-target bird species (2004) Biol. Conserv., 117, pp. 105-110;<br/>Elphick, C.S., Landscape effects on waterbird densities in California rice fields: taxonomic differences, scale-dependence, and conservation implications (2008) Waterbirds, 31, pp. 62-69;<br/>Ernoul, L., Mesléard, F., Gaubert, P., Béchet, A., Limits to agri-environmental schemes uptake to mitigate human-wildlife conflict: lessons learned from Flamingos in the Camargue, southern France (2013) Int. J. Agric. Sustain., 12, pp. 23-36;<br/>World rice statistics (2013) Extracted from the public database, , Accessed on February 2013;<br/>Fasola, M., Ruiz, X., The value of rice fields as substitutes for natural wetlands for waterbirds in the Mediterranean region (1996) Colonial Waterbirds, 19, pp. 122-128;<br/>Feare, C.J., Role of wild birds in the spread of highly pathogenic avian influenza virus H5N1 and implications for global surveillance (2010) Avian Dis., 54, pp. 201-212;<br/>Ferrer, X., Els poblaments hivernals d'anàtids (1986) Història Natural dels Països Catalans, pp. 398-404. , Ocells, Fundació Enciclopèdia Catalana, S.A., Barcelona, Spain, 12, X. Ferrer, A. Martínez i Vilalta, J. Muntaner (Eds.);<br/>Ferreyra, H., Romano, M., Uhart, M., Recent and chronic exposure of wild ducks to lead in human-modified wetlands in Santa Fe Province, Argentina (2009) J. Wildl. Dis., 45, pp. 823-827;<br/>Figuerola, J., Green, A.J., Dispersal of aquatic organisms by waterbirds: a review of past research and priorities for future studies (2002) Freshwater Biol., 47, pp. 483-494;<br/>Finlayson, C., Davidson, N., (1999) Global Review of Wetland Resources and Priorities for Wetland Inventory, p. 15. , Preface iv Summary Report;<br/>Finlayson, C.M., Hollis, T., Dacis, T., Crivelli, A., Managing Mediterranean wetlands and their birds (1992) International Waterfowl and Wetland Research Bureau, , Special Publication 20, Slimbridge, United Kingdom;<br/>Fleskes, J.P., Yee, J.L., Casazza, M.L., Miller, M.R., Takekawa, J.Y., Orthmeyer, D.L., (2005) Waterfowl Distribution, Movements and Habitat Use Relative to Recent Habitat Changes in the Central Valley of California: A Cooperative Project to Investigate Impacts of the Central Valley Habitat Joint Venture and Changing Agricultural Practices on the Ecology of Wintering Waterfowl, , http://www.werc.usgs.gov/ProductDetails.aspx?.ID=3247, Dixon, California, USA, (accessed June 2013);<br/>Fleskes, J.P., Yee, J.L., Yarris, G.S., Miller, M.R., Casazza, M.L., Pintail and mallard survival in California relative to habitat, abundance, and hunting (2007) J. Wildl. Manag., 71, pp. 2238-2248;<br/>Fleskes, J.P., Miller, M.R., Yarris, G.S., Thomas, D.R., Eadie, J.M., Increased winter habitat improves body condition of ducks in the Central Valley of California (2009) 5th North American Duck Symposium, , http://www.northamericanducksymposium.org/docs/fleskes_oral.pdf, Accessed on June 2013;<br/>Fleskes, J.P., Halstead, B.J., Casazza, M.L., Coates, P.S., Kohl, J.D., Skalos, D.A., Waste rice seed in conventional and stripper-head harvested fields in California: implications for wintering waterfowl (2012) J. Fish Wildl. Manag., 3, pp. 266-275;<br/>Fleskes, J.P., Skalos, D.A., Farinha, M.A., Bird use of fields treated postharvest with two types of flooding in Tulare basin, California (2012) J. Fish Wildl. Manag., 3, pp. 164-174;<br/>Fraser, L.H., Keddy, P.A., (2005) The World's Largest Wetlands: Ecology and Conservation, , Cambridge University Press;<br/>Fu, Z.-Q., Huang, H., Chen, C., He, B.-L., Effect of irrigation depths on methane emission in rice-duck complex ecosystems (2006) J. Hunan Agri. Univ., 32, p. 632;<br/>Fujioka, M., Don Lee, S., Kurechi, M., Yoshida, H., Bird use of rice fields in Korea and Japan (2010) Waterbirds, 33, pp. 8-29;<br/>Furuno, T., (2001) The Power of Duck: Integrated Rice and Duck Farming, , Tagari Publications;<br/>Gauthier, G., Giroux, J.F., Reed, A., Béchet, A., Bélanger, L., Interactions between land use, habitat use, and population increase in greater snow geese: what are the consequences for natural wetlands? (2005) Glob. Change Biol., 11, pp. 856-868;<br/>Gauthier-Clerc, M., Lebarbenchon, C., Thomas, F., Recent expansion of highly pathogenic avian influenza H5N1: a critical review (2007) Ibis, 149, pp. 202-214;<br/>Grado, S.C., Hunt, K.M., Hutt, C.P., Santos, X.T., Kaminski, R.M., Economic impacts of waterfowl hunting in Mississippi derived from a state-based mail survey (2011) Hum. Dimens. Wildl., 16, pp. 100-113;<br/>Green, A.J., Elmberg, J., Ecosystem services provided by waterbirds (2014) Biol. Rev., 89, pp. 105-122;<br/>Greer, D.M., Dugger, B.D., Reinecke, K.J., Petrie, M.J., Depletion of rice as food of waterfowl wintering in the Mississippi Alluvial Valley (2009) J. Wildl. Manag., 73, pp. 1125-1133;<br/>Guadagnin, D.L., Peter, A.S., Rolon, A.S., Stenert, C., Maltchik, L., Does non-intentional flooding of rice fields after cultivation contribute to waterbird conservation in Southern Brazil? (2012) Waterbirds, 35, pp. 371-380;<br/>Guijt, I., Hinchcliffe, F., Melnyk, M., The hidden harvest: the value of wild resources in agricultural systems: a summary (1995) IIED;<br/>Guillemain, M., Corbin, J., Fritz, H., Interruptions of terrestrial feeding as a way to decrease the non-digestible fraction of the bolus: field observations and laboratory experiments in Mallard (1999) Wildfowl, 50, pp. 123-132;<br/>Guillemain, M., Fritz, H., Duncan, P., The importance of protected areas as nocturnal feeding grounds for dabbling ducks wintering in western France (2002) Biol. Conserv., 103, pp. 183-198;<br/>Halwart, M., Gupta, M.V., (2004) Culture of Fish in Ricefields, , FAO, The World Fish Center, Rome, Italy, Penang, Malaysia;<br/>Havens, J.H., Kaminski, R.M., Davis, J.B., Riffell, S., Winter abundance of waterfowl and waste rice in managed Arkansas rice fields (2009) Proc. Annu. Conf. Southeastern Assoc. Fish Wildl. Agencies, 63, pp. 41-46;<br/>Heath, M.F., Evans, M.I., Important bird areas in Europe: priority regions for conservation: Southern Europe (2000) Bird Life International Conservation, 2. , Birdlife International, Cambridge, UK;<br/>Hohman, W.L., Moore, J.L., Stark, T.M., Weisbrich, G.A., Coon, R.A., Breeding waterbird use of Louisiana rice fields in relation to planting practices (1994) Proc. Annu. Conf. Southeastern Assoc. Fish Wildl. Agencies, 48, pp. 31-37;<br/>Hohman, W.L., Stark, T.M., Moore, J.L., Food availability and feeding preferences of breeding fulvous whistling-ducks in Louisiana ricefields (1996) Wilson Bull., 108, pp. 137-150;<br/>Horgan, F.G., Overuse of pesticides in Asian rice paddies (2012) IRRI. Side Event, Ramsar CoP 11, , Wetlands International, Bucharest, Romania;<br/>Hossain, S.T., Sugimoto, H., Ahmed, G.J.U., Islam, M.R., Effect of integrated rice-duck farming on rice yield farm productivity, and rice-provisioning ability of farmers (2005) Asian J. Agric. Dev., 2, pp. 79-86;<br/>Huner, J.V., (1994) Freshwater Crayfish Aquaculture in North America, Europe, and Australia: Families Astacidae, Canbaridae and Parastacidae, , The Haworth Press, Binghamton, New York;<br/>IBAs, the global currency for site conservation (2013), Accessed on September 2013Etat des connaissances scientifiques et techniques et perspectives de recherche (2012) Proceedings of the First International Conference Organic Rice Farming and Production Systems;<br/>The IUCN Red List of Threatened Species (2014), accessed February 2013Ibáñez, C., Curcó, A., Riera, X., Ripoll, I., Sánchez, C., Influence on birds of rice field management practices during the growing season: a review and an experiment (2010) Waterbirds, 33, pp. 167-180;<br/>Kaminski, R.M., Davis, J.B., Essig, H.W., Gerard, P.D., Reinecke, K.J., True metabolizable energy for wood ducks from acorns compared to other waterfowl foods (2003) J. Wildl. Manag., 67, pp. 542-550;<br/>Kasahara, S., Koyama, K., Population trends of common wintering waterfowl in Japan: participatory monitoring data from 1996 to 2009 (2010) Ornithol. Sci., 9, pp. 23-36;<br/>Katayama, N., Amano, T., Naoe, S., Yamakita, T., Komatsu, I., Takagawa, S.I., Sato, N., Miyashita, T., Landscape heterogeneity-biodiversity relationship: effect of range size (2014) PLoS One, 9 (3);<br/>Katondo, J., Ecology of Anatidae and their damage to rice crops at Lower Moshi irrigation scheme, northern Tanzania (1996) Gibier Faune Sauvage, 13, pp. 737-750;<br/>King, S., Elphick, C.S., Guadagnin, D., Taft, O., Amano, T., Effects of landscape features on waterbird use of rice fields (2010) Waterbirds, 33, pp. 151-159;<br/>Krapu, G.L., Reinecke, K.J., Foraging ecology and nutrition (1992) Ecology and Management of Breeding Waterfowl, pp. 1-29. , University of Minnesota Press, Minneapolis, B.D.J. Batt, A.D. Afton, M.G. Anderson, C.D. Ankney, D.H. Johnson, J.A. Kadlec, G.L. Krapu (Eds.);<br/>Kross, J.P., Kaminski, R.M., Reinecke, K.J., Pearse, A.T., Conserving waste rice for wintering waterfowl in the Mississippi Alluvial Valley (2008) J. Wildl. Manag., 72, pp. 1383-1387;<br/>Kurechi, M., Restoring rice paddy wetland environments and the local sustainable society-project for achieving co-existence of rice paddy agriculture with waterbirds at Kabukuri-numa, Miyagi Prefecture, Japan (2007) Glob. Environ. Res., 11, pp. 141-152;<br/>Lane, S.J., Azuma, A., Higuchi, H., Wildfowl damage to agriculture in Japan (1998) Agric. Ecosyst. Environ., 70, pp. 69-77;<br/>Lawler, S.P., Dritz, D.A., Effects of rice straw and water management on riceland mosquitoes (2006) J. Med. Entomol., 43, pp. 828-832;<br/>Lawler, S.P., Rice fields as temporary wetlands: a review (2001) Isr. J. Zool., 47, pp. 513-528;<br/>Long, P., Huang, H., Liao, X., Fu, Z., Zheng, H., Chen, A., Chen, C., Mechanism and capacities of reducing ecological cost through rice-duck cultivation (2013) J. Sci. Food Agric., 93, pp. 2881-2891;<br/>Lourenço, P.M., Piersma, T., Waterbird densities in South European rice fields as a function of rice management (2009) Ibis, 151, pp. 196-199;<br/>Mañosa i Rifé, S., (1997) A Review on Rice Farming and Waterbird Conservation in Three Western Mediterranean Areas: the Camargue, the Ebro Delta, and the North-Western Po Plain, , Station Biologique La Tour du Valat Internal Report, Arles, France;<br/>MacMillan, D., Hanley, N., Daw, M., Costs and benefits of wild goose conservation in Scotland (2004) Biol. Conserv., 119, pp. 475-485;<br/>Madsen, J., Fox, A.D., Impacts of hunting disturbance on waterbirds-a review (1995) Wildl. Biol., 1, pp. 193-207;<br/>Malla, G., Climate change and its impact on Nepalese agriculture (2008) J. Agric. Environ., 9, pp. 62-71;<br/>Manley, S.W., Kaminski, R.M., Reinecke, K.J., Gerard, P.D., Waterbird foods in winter-managed ricefields in Mississippi (2004) J. Wildl. Manag., 68, pp. 74-83;<br/>Manley, S.W., Kaminski, R.M., Reinecke, K.J., Gerard, P.D., Agronomic implications of waterfowl management in Mississippi ricefields (2005) Wildl. Soc. Bull., 33, pp. 981-992;<br/>Marty, J.R., Davis, J.B., Kaminski, R.M., Brasher, M.G., Wang, G., Waterbird response to the migratory bird habitat initiative in Coastal Louisiana and Texas (2012) 5th North American Duck Symposium;<br/>Mateo, R., Guitart, R., Green, A.J., Determinants of lead shot, rice and grit ingestion in ducks and coots (2000) J. Wildl. Manag., 64, pp. 939-947;<br/>Mathevet, R., Mesléard, F., The origins and functioning of the private wildfowling lease system in a major Mediterranean wetland: the Camargue (Rhone river delta, southern France) (2002) Land Use Policy, 19, pp. 277-286;<br/>Mathevet, R., Bousquet, F., Le Page, C., Antona, M., Agent-based simulations of interactions between duck population, farming decisions and leasing of hunting rights in the Camargue (Southern France) (2003) Ecol. Model., 165, pp. 107-126;<br/>McNeil, R., Drapeau, P., Goss-Custard, J.D., The occurrence and adaptive significance of nocturnal habits in waterfowl (1992) Biol. Rev., 67, pp. 381-419;<br/>Men, B., (2010) Duck Farming Systems and Avian Influenza in the Mekong Delta of Viet Nam, , Report Submitted to FAO;<br/>Mendez del Villar, P., Bauer, J.M., Le riz en Afrique de l'Ouest: dynamiques, politiques et perspectives (2013) Cah. Agric., 22, pp. 334-336;<br/>Mesléard, F., Grillas, P., Tan Ham, L., Restoration of seasonally-flooded marshes in abandoned ricefields in the Camargue (southern France)-preliminary results on vegetation and use by ducks (1995) Ecol. Eng., 5, pp. 95-106;<br/>Mesléard, F., Garnero, S., Beck, N., Rosecchi, É., Uselessness and indirect negative effects of an insecticide on rice field invertebrates (2005) C. R. Biol., 328, pp. 955-962;<br/>Miles, A.K., Lawler, S.P., Dritz, D., Spring, S., Effects of mosquito larvicide on mallard ducklings and prey (2002) Wildl. Soc. Bull., 30, pp. 675-682;<br/>Miller, M.R., Garr, J.D., Coates, P.S., Changes in the status of harvested rice fields in the Sacramento Valley, California: implications for wintering waterfowl (2010) Wetlands, 30, pp. 939-947;<br/>Miller, M.L., Ringelman, K.M., Schank, J.C., Eadie, J.M., SWAMP: an agent-based model for wetland and waterfowl conservation management (2014) Simulation, 90, pp. 52-68;<br/>Miyabayashi, Y., Mundkur, T., Atlas of key sites for Anatidae in the East Asian Flyway (1999) Wetlands Int.;<br/>Moriguchi, S., Onuma, M., Goka, K., Potential risk map for avian influenza A virus invading Japan (2013) Divers. Distrib., 19, pp. 78-85;<br/>Musters, C., Kruk, M., De Graaf, H., Ter Keurs, W., Breeding birds as a farm product (2001) Conserv. Biol., 15, pp. 363-369;<br/>Muzaffar, S.B., Takekawa, J.Y., Prosser, D.J., Newman, S.H., Xiao, X., Rice production systems and avian influenza: interactions between mixed-farming systems, poultry and wild birds (2010) Waterbirds, 33, pp. 219-230;<br/>Natuhara, Y., Ecosystem services by paddy fields as substitutes of natural wetlands in Japan (2013) Ecol. Eng., 56, pp. 97-106;<br/>Navedo, J.G., Masero, J.A., Sanchez-Guzman, J.M., Abad-Gomez, J.M., Gutierrez, J.S., Sanson, E.G., Villegas, A., Moran, R., International importance of Extremadura, Spain, for overwintering migratory dabbling ducks: a role for reservoirs (2012) Bird Conserv. Int., 22, pp. 316-327;<br/>Navedo, J.G., Hahn, S., Parejo, M., Abad-Gómez, J.M., Gutiérrez, J.S., Villegas, A., Sánchez-Guzmán, J.M., Masero, J.A., Unravelling trophic subsidies of agroecosystems for biodiversity conservation: food consumption and nutrient recycling by waterbirds in Mediterranean rice fields (2015) Sci. Total Environ., 511, pp. 288-297;<br/>Naylor, R., Invasions in agriculture: assessing the cost of the golden apple snail in Asia (1996) Ambio, 25, pp. 443-448;<br/>Nelms, C.O., Twedt, D.J., Seed deterioration in flooded agricultural fields during winter (1996) Wildl. Soc. Bull., 24, pp. 85-88;<br/>Oerke, E.-C., Crop losses to pests (2006) J. Agric. Sci., 144, pp. 31-43;<br/>Oltra, C., Dies, J.I., García, F.J., Dies, B., Catalá, F.J., Anátidas Invernantes en el Parc Natural de L'Albufera de València: Descripción y Factores Ambientales Implicados (2001) Spartina, 4, pp. 1-20;<br/>Ortiz-Monasterio, I., Wassmann, R., Govaerts, B., Hosen, Y., Katayanagi, N., Verhulst, N., Greenhouse gas mitigation in the main cereal systems: rice, wheat, and maize (2010) Climate Change and Crop Production, pp. 151-176. , CABI Publishing, Wallingford, UK, M.P. Reynolds (Ed.);<br/>Parsons, K.C., Mineau, P., Renfrew, R.B., Effects of pesticide use in rice fields on birds (2010) Waterbirds, 33, pp. 193-218;<br/>Pearse, A.T., Kaminski, R.M., Reinecke, K.J., Dinsmore, S.J., Local and landscape associations between wintering dabbling ducks and wetland complexes in Mississippi (2012) Wetlands, 325, pp. 859-869;<br/>Perennou, C., Beltrame, C., Guelmami, A., Vives, P.T., Caessteker, P., Existing areas and past changes of wetland extent in the Mediterranean region: an overview (2012) Ecol. Mediterranea, 38, pp. 53-66;<br/>Pernollet, C.A., Guelmami, A., Green, A.J., Curcó Masip, A., Dies, B., Bogliani, G., Tesio, F., Guillemain, M., A comparison of wintering duck numbers among European rice production areas with contrasting flooding regimes (2015) Biol. Conserv., 186, pp. 214-224;<br/>Petrie, M., Brasher, M., Dale, J., (2014) Estimating the Biological and Economic Contributions that Rice Habitats Make in Support of North American Waterfowl Populations, , A Report to the Rice Foundation from Ducks Unlimited Inc;<br/>Phalan, B., Bertzky, M., Butchart, S.H., Donald, P.F., Scharlemann, J.P., Stattersfield, A.J., Balmford, A., Crop expansion and conservation priorities in tropical countries (2013) PLoS One, 8, p. e51759;<br/>Phillips, J.C., A natural history of the ducks (1923) The Genus Anas, 2. , Houghton Mifflin Co., Boston, USA;<br/>Pierluissi, S., Breeding waterbirds in rice fields: a global review (2010) Waterbirds, 33, pp. 123-132;<br/>Pirot, J.-Y., (1981) Exploitation alimentaire nocturne des grands types de milieux camarguais par cinq espèces de canards de surface en hivernage et en transit, , Rapport Annuel act. 4, O.N.C./C.N.R.S;<br/>Ponçon, N., Balenghien, T., Toty, C., Ferré, J.B., Thomas, C., Dervieux, A., L'Ambert, G., Fontenille, D., Effects of local anthropogenic changes on potential malaria vector Anopheles hyrcanus and West Nile virus vector Culex modestus, Camargue, France (2007) Emerging Infect. Dis., 13, pp. 1810-1815;<br/>Pontius, J., Dilts, R., Bartlett, A., (2002) From Farmer Field School to Community IPM: Ten Years of Ipm Training in Asia, , FAO Community IPM Programme, Food and Agriculture Organization of the United Nations;<br/>Post, D., Taylor, J., Kitchell, J., Olson, M., Schindler, D., Herwig, B., The role of migratory waterfowl as nutrient vectors in a managed wetland (1998) Conserv. Biol., 12, pp. 910-920;<br/>Powers, K.D., Noble, R.E., Chabreck, R.H., Seed distribution by waterfowl in southwestern Louisiana (1978) J. Wildl. Manag., 42, pp. 598-615;<br/>Röling, N.G., Van de Fliert, E., Introducing integrated pest management in rice in Indonesia: a pioneering attempt to facilitate large-scale change (1998) Facilitating Sustainable Agriculture: Participatory Learning and Adaptive Management in Times of Environmental Uncertainty, pp. 153-171. , Cambridge University Press, Cambridge, N.G. Röling, M.A.E. Wagemakers (Eds.);<br/>Rave, D.P., Cordes, C.L., Time-activity budget of Northern Pintails using nonhunted rice fields in Southwest Louisiana (1993) J. Field Ornithol., 64, pp. 211-218;<br/>Rebelo, L.-M., McCartney, M., Finlayson, C., Wetlands of Sub-Saharan Africa: distribution and contribution of agriculture to livelihoods (2010) Wetlands Ecol. Manag., 18, pp. 557-572;<br/>Rendón, M.A., Green, A.J., Aguilera, E., Almaraz, P., Status, distribution and long-term changes in the waterbird community wintering in Donana, south-west Spain (2008) Biol. Conserv., 141, pp. 1371-1388;<br/>Rodenburg, J., Johnson, D., Weed management in rice-based cropping systems in Africa (2009) Adv. Agron., 103, pp. 149-218;<br/>Roh, K., Ko, B., Shim, K., Evaluation of the influence of the rice-duck farming system on regional environment at Hongsung Area (2009) 9th International Conference of The East and Southeast Asia Federation of Soil Science Societies S6P19, pp. 651-652;<br/>Schuyt, K.D., Economic consequences of wetland degradation for local populations in Africa (2005) Ecol. Econ., 53, pp. 177-190;<br/>Sesser, K.A., Reiter, M.E., Skalos, D.A., Strum, K.M., Hickey, C.M., (2014) Waterbird Response to Practices Aimed at Reducing Greenhouse Gas Emissions from Rice Fields in The Sacramento Valley, , Report to the Environmental Defense Fund;<br/>Shimada, T., Bowman, A., Ishida, M., Effects of flooding on a wetland bird community (2000) Ecol. Res., 15, pp. 229-235;<br/>Stafford, J.D., Kaminski, R.M., Reinecke, K.J., Manley, S.W., Waste rice for waterfowl in the Mississippi Alluvial Valley (2006) J. Wildl. Manag., 70, pp. 61-69;<br/>Stafford, J.D., Kaminski, R.M., Reinecke, K.J., Avian foods, foraging and habitat conservation in world rice fields (2010) Waterbirds, 33, pp. 133-150;<br/>Subramanian, S., Nair, N.S., Sundaram, R.N.S., (1996) Technology for Duck-Fish Integrated Faming System in Goa. ICAR Research Complex for Goa Technical Folder 10, , Ela, Old Goa;<br/>Suh, J., Theory and reality of integrated rice-duck farming in Asian developing countries: a systematic review and SWOT analysis (2014) Agric. Syst., 125, pp. 74-81;<br/>Suh, J., An institutional and policy framework to foster integrated rice-duck farming in Asian developing countries (2014) Int. J. Agric. Sustain., pp. 1-14;<br/>Sullivan, B.L., Aycrigg, J.L., Barry, J.H., Bonney, R.E., Bruns, N., Cooper, C.B., Damoulas, T., Kelling, S., The eBird enterprise: an integrated approach to development and application of citizen science (2014) Biol. Conserv., 169, pp. 31-40;<br/>Sundar, K.G., Subramanya, S., Bird use of rice fields in the Indian subcontinent (2010) Waterbirds, 33, pp. 44-70;<br/>Taft, O., Elphick, C., Waterbirds on working lands: literature review and bibliography development (2007) Technical Report, , http://www.audubon.org/bird/waterbirds/downloads.html, New York, New York (accessed January 2013);<br/>Tai, C., Tai, J.-J.L., Future prospects of duck production in Asia (2001) J. Poult. Sci., 38, pp. 99-112;<br/>Tajiri, H., Ohkawara, K., The effects of flooding and plowing on foraging site selection by wintering dabbling ducks in rice fields (2013) Ornithol. Sci., 12, pp. 127-136;<br/>Tajiri, H., Sakurai, Y., Tagome, K., Nakano, Y., Yamamoto, Y., Ikeda, T., Yamamura, Y., Ohkawara, K., Foraging site selection and conservation of the Baikal Teal in rice fields around Katano-kamoike, Kaga City Japan (2014) Ornithol. Sci., 631;<br/>Tamisier, A., Dehorter, O., (1999) Camargue, canards et foulques: Fonctionnement et devenir d'un prestigieux quartier d'hiver, , Centre ornithologique du Gard Nîmes, France;<br/>Taylor, I.R., Schultz, M.C., Waterbird use of rice fields in Australia (2010) Waterbirds, 33, pp. 71-82;<br/>BirdReturns Project (2014), Accessed October 2014Tietje, W., Teer, J., Winter feeding ecology of northern shovelers on freshwater and saline wetlands in south Texas (1996) J. Wildl. Manag., 60, pp. 843-855;<br/>Toral, G.M., Figuerola, J., Unraveling the importance of rice fields for waterbird populations in Europe (2010) Biodivers. Conserv., 19, pp. 3459-3469;<br/>Toral, G.M., Aragonés, D., Bustamante, J., Figuerola, J., Using Landsat images to map habitat availability for waterbirds in rice fields (2011) Ibis, 153, pp. 684-694;<br/>Tourenq, C., Bennetts, R.E., Kowalski, H., Vialet, E., Lucchesi, J.-L., Kayser, Y., Isenmann, P., Are ricefields a good alternative to natural marshes for waterbird communities in the Camargue, southern France? (2001) Biol. Conserv., 100, pp. 335-343;<br/>Tourenq, C., Aulagnier, S., Durieux, L., Lek, S., Mesleard, F., Johnson, A., Martin, J.L., Identifying rice fields at risk from damage by the greater flamingo (2001) J. Appl. Ecol., 38, pp. 170-179;<br/>Tourenq, C., Sadoul, N., Beck, N., Mesléard, F., Martin, J.-L., Effects of cropping practices on the use of rice fields by waterbirds in the Camargue, France (2003) Agric. Ecosyst. Environ., 95, pp. 543-549;<br/>Tréca, B., (1992) Water Birds and Rice Cultivation in West Africa, pp. 297-301. , Proceeding VII, Pan African Ornithological Congress;<br/>Twedt, D.J., Nelms, C.O., Waterfowl density on agricultural fields managed to retain water in winter (1999) Wildl. Soc. Bull., 27, pp. 924-930;<br/>Division of Bird Habitat Conservation (2014) North American Waterfowl Management Plan, , Accessed September 2013;<br/>Van Groenigen, J., Burns, E., Eadie, J., Horwath, W., Van Kessel, C., Effects of foraging waterfowl in winter flooded rice fields on weed stress and residue decomposition (2003) Agric. Ecosyst. Environ., 95, pp. 289-296;<br/>Van Nguyen, N., Ferrero, A., Meeting the challenges of global rice production (2006) Paddy Water Environ., 4 (1), pp. 1-9;<br/>Verhulst, J., Kleijn, D., Berendse, F., Direct and indirect effects of the most widely implemented Dutch agri-environment schemes on breeding waders (2007) J. Appl. Ecol., 44, pp. 70-80;<br/>Vickery, J., Watkinson, A., Sutherland, W., The solutions to the brent goose problem: an economic analysis (1994) J. Appl. Ecol., 31, pp. 371-382;<br/>Wagner, K.K., Schmidt, R.H., Conover, M.R., Compensation programs for wildlife damage in North America (1997) Wildl. Soc. Bull., 25, pp. 312-319;<br/>Washitani, I., Traditional sustainable ecosystem 'SATOYAMA' and biodiversity crisis in Japan: conservation ecological perspective (2001) Glob. Environ. Res., 5, pp. 119-133;<br/>Whelan, C.J., Wenny, D.G., Marquis, R.J., Ecosystem services provided by birds (2008) Ann. N. Y. Acad. Sci., 1134, pp. 25-60;<br/>Wood, C., Qiao, Y., Li, P., Ding, P., Lu, B., Xi, Y., Implications of rice agriculture for wild birds in China (2010) Waterbirds, 33, pp. 30-43;<br/>Wymenga, E., Zwarts, L., Use of rice fields by birds in West Africa (2010) Waterbirds, 33, pp. 97-104;<br/>Yusa, Y., Sugiura, N., Wada, T., Predatory potential of freshwater animals on an invasive agricultural pest, the apple snail Pomacea canaliculata (Gastropoda: Ampullariidae), in southern Japan (2006) Biol. Invasions, 8, pp. 137-147;<br/>Zhang, J.-E., Ouyang, Y., Huang, Z.-X., Characterization of nitrous oxide emission from a rice-duck farming system in south China (2008) Arch. Environ. Contam. Toxicol., 54, pp. 167-172</p>
N1  - <p>References: Acosta, M., Mugica, L., Blanco, D., López-Lanús, B., Dias, R.A., Doodnath, L.W., Hurtado, J., Birds of rice fields in the Americas (2010) Waterbirds, 33, pp. 105-122; <br/>Adzitey, F., Adzitey, S., Duck production: Has a potential to reduce poverty among rural households in Asian communities-a review (2011) Worlds Poult. Res., 1, pp. 7-10;<br/>Ahmadi, N., Bouman, B., Riz et rizicultures, enjeux économiques, écologiques et scientifiques (2013) Cah. Agric., 22, pp. 333-335;<br/>Amano, T., Ushiyama, K., Fujita, G., Higuchi, H., Factors affecting rice grain density unconsumed by white-fronted geese in relation to wheat damage (2004) Agric. Ecosyst. Environ., 102, pp. 403-407;<br/>Amano, T., Ushiyama, K., Moriguchi, S., Fujita, G., Higuchi, H., Decision-making in group foragers with incomplete information: test of individual-based model in geese (2006) Ecol. Monogr., 76, pp. 601-616;<br/>Amano, T., Kusumoto, Y., Tokuoka, Y., Yamada, S., Kim, E.-Y., Yamamoto, S., Spatial and temporal variations in the use of rice-paddy dominated landscapes by birds in Japan (2008) Biol. Conserv., 141, pp. 1704-1716;<br/>Amano, T., Kusumoto, Y., Okamura, H., Baba, Y.G., Hamasaki, K., Tanaka, K., Yamamoto, S., A macro-scale perspective on within farm management: how climate and topography alter the effect of farming practices (2011) Ecol. Lett., 14, pp. 1263-1272;<br/>Amano, T., Avian responses to heterogeneity in rice fields at local, landscape and macro scales (2014) Ornithol. Sci., 7;<br/>Anders, M.M., Van Kessel, K., Eadie, J.M., Agronomic impacts of winter wetland and waterfowl management in ricelands (2008) Conservation in Ricelands of North America, pp. 91-117. , The Rice Foundation, Stuttgart, Arkansas, S.W. Manley (Ed.);<br/>Arzel, C., Guillemain, M., Gurd, D., Elmberg, J., Fritz, H., Arnaud, A., Pin, C., Bosca, F., Experimental functional response and inter-individual variation in foraging rate of teal (Anas crecca) (2007) Behav. Process., 75, pp. 66-71;<br/>Baki, B., Chin, D., Mortimer, M., (2000) Wild and Weedy Rice in Rice Ecosystems in Asia-A Review, , International Rice Research Institute;<br/>Baldassarre, G.A., Bolen, E.G., Field-feeding ecology of waterfowl wintering on the Southern High Plains of Texas (1984) J. Wildl. Manag., 48, pp. 63-71;<br/>Balmford, A., Green, R., Phalan, B., What conservationists need to know about farming (2012) Proc. R. Soc. B, 279, pp. 2714-2724;<br/>Barroga, R., Gicana, N., Barroga, A., Socio-economic evaluation of rice-duck farming system in Bukidnon (2007) Philipp. J. Vet. Anim. Sci., 33, pp. 47-72;<br/>Batzer, D.P., Resh, V., Wetland management strategies that enhance waterfowl habitats can also control mosquitoes (1992) J. Am. Mosq. Control Assoc., 8, pp. 117-125;<br/>Bellio, M., Kingsford, R., Kotagama, S., Natural versus artificial-wetlands and their waterbirds in Sri Lanka (2009) Biol. Conserv., 142, pp. 3076-3085;<br/>Bird, J., Pettygrove, G., Eadie, J., The impact of waterfowl foraging on the decomposition of rice straw: mutual benefits for rice growers and waterfowl (2000) J. Appl. Ecol., 37, pp. 728-741;<br/>Bird, J., Eagle, A., Horwath, W., Hair, M., Zilbert, E., van Kessel, C., Long-term studies find benefits, challenges in alternative rice straw management (2002) Calif. Agric., 56, pp. 69-75;<br/>Important Bird Areas factsheet: Jakhaly rice-fields (2014), accessed October 2014Important Bird Areas factsheet: Doho Rice Scheme (2014), Accessed October 2014Blanco, D.E., López-Lanús, B., Dias, R.A., Azpiroz, A., Rilla, F., (2006) Uso de arroceras por chorlos y playeros migratorios en el sur de América del Sur. Implicancias de conservación y manejo, , Wetlands International, Buenos Aires, Argentina;<br/>Brochet, A.-L., Guillemain, M., Fritz, H., Gauthier-Clerc, M., Green, A.J., The role of migratory ducks in the long-distance dispersal of native plants and the spread of exotic plants in Europe (2009) Ecography, 32, pp. 298-919;<br/>Brochet, A.-L., Gauthier-Clerc, M., Mathevet, R., Béchet, A., Mondain-Monval, J.-Y., Tamisier, A., Marsh management, reserve creation, hunting periods and carrying capacity for wintering ducks and coots (2009) Biodivers. Conserv., 18, pp. 1879-1894;<br/>Brochet, A.-L., Guillemain, M., Gauthier-Clerc, M., Fritz, H., Green, A.J., Endozoochory of Mediterranean aquatic plant seeds by teal after a period of desiccation: determinants of seed survival and influence of retention time on germinability and viability (2010) Aquat. Bot., 93, pp. 99-106;<br/>Brochet, A.-L., Mouronval, J.-B., Aubry, P., Gauthier-Clerc, M., Green, A.J., Fritz, H., Guillemain, M., Diet and feeding habitats of camargue dabbling ducks: what has changed since the 1960? (2012) Waterbirds, 35, pp. 555-576;<br/>Brogi, A., Pernollet, C.A., Gauthier-Clerc, M., Guillemain, M., Waterfowl foraging in winter-flooded rice fields: any agronomic benefits for farmers? (2015) Ambio, , (in press);<br/>Buler, J.J., Barrow, W.C., Randall, L., (2010) An Assessment of Wintering Waterfowl Use of Wetland Reserve Program Restored Wetlands in California Using NEXRAD Weather Radar: Final Report, , Final report to Natural Resources Conservation Service;<br/>Byun, C., Kwon, G.J., Lee, D., Wojdak, J.M., Kim, J.G., Ecological assessment of plant succession and water quality in abandoned rice fields (2008) J. Ecol. Field Biol., 31, pp. 213-223;<br/>Bywater, V., Ribot, R., Buttemer, B., Bennett, A.T.D., Waterfowl utilize different habitat at night: implications for conservation (2014) Ornithol. Sci., 27;<br/>COLTIVAZIONE RISO NATURALE dalla parte della biodiversita (24'). Progetto finanziato nell'ambito del programma regionale di ricerca in campo agricolo 2007-2010 (2010) Regione Lombardia Direzione GeneraleAgricoltura, , Una realizzanione White Fox;<br/>Chamberlain, D.E., Crick, H.Q., Population declines and reproductive performance of skylarks Alauda arvensis in different regions and habitats of the United Kingdom (1999) Ibis, 141, pp. 38-51;<br/>Chan, S.-F., Severinghaus, L.L., Lee, C.-K., The effect of rice field fragmentation on wintering waterbirds at the landscape level (2007) J. Ornithol., 148, pp. 333-342;<br/>Cheng-fang, L., Cou-gui, C., Jin-ping, W., Ming, Z., Wei-ling, Y., Ahmad, S., Nitrogen losses from integrated rice-duck and rice-fish ecosystems in southern China (2008) Plant Soil, 307, pp. 207-217;<br/>Choi, J.H., Yoo, J.C., Use of rice fields by bean geese Anser fabalis and white-fronted geese Anser albifrons wintering in Hangang River Estuary according to post-harvest treatment (2014) Ornithol. Sci., 612;<br/>Comín, F.A., Romero, J.A., Hernández, O., Menéndez, M., Restoration of wetlands from abandoned rice fields for nutrient removal, and biological community and landscape diversity (2001) Restor. Ecol., 9, pp. 201-208;<br/>Cox, R.R., Afton, A.D., Use of habitats by female northern pintails wintering in southwestern Louisiana (1997) J. Wildl. Manag., 61, pp. 435-443;<br/>Czech, H.A., Parsons, K.C., Agricultural wetlands and waterbirds: a review (2002) Waterbirds, pp. 56-65;<br/>Davidson, N.C., How much wetland has the world lost? Long-term and recent trends in global wetland area (2014) Mar. Freshwater Res., 65, pp. 934-941;<br/>Day, J.H., Colwell, M.A., Waterbird communities in rice fields subjected to different post-harvest treatments (1998) Colon. Waterbird, 21, pp. 185-197;<br/>De Grazio, J.W., World bird damage problems (1978) Proceedings of 8th Vertebrate Pest Conference, pp. 9-24. , Davis, California, W.E. Howard (Ed.);<br/>De Mey, Y., Demont, M., Diagne, M., Estimating bird damage to rice in Africa: evidence from the Senegal River Valley (2012) J. Agric. Econ., 63, pp. 175-200;<br/>De Vlaming, V., Proctor, V.W., Dispersal of aquatic organisms: viability of seeds recovered from the droppings of captive killdeer and mallard ducks (1968) Am. J. Bot., 55, pp. 20-26;<br/>Dessborn, L., Brochet, A., Elmberg, J., Legagneux, P., Gauthier-Clerc, M., Guillemain, M., Geographical and temporal patterns in the diet of pintail Anas acuta, wigeon Anas penelope, mallard Anas platyrhynchos and teal Anas crecca in the Western Palearctic (2011) Eur. J. Wildl. Res., 57, pp. 1119-1129;<br/>Movements and resource utilization of four species of ducks captured in the mid-Parana River Basin, Corrientes Province, Argentina (2012) Final Report Submitted to Tudor Farms, Cambridge, Maryland, USA;<br/>Donald, P., Green, R., Heath, M., Agricultural intensification and the collapse of Europe's farmland bird populations (2001) Proc. R. Soc. B, 268, pp. 25-29;<br/>Donald, P.F., Biodiversity impacts of some agricultural commodity production systems (2004) Conserv. Biol., 18, pp. 17-38;<br/>Dufumier, M., Les systèmes de riziculture alternatifs dans le monde (2012) Les dossiers de conférence. 1ère conférence internationale. Les systèmes de production rizicole biologique. 27-30 aot 2012, pp. 27-31. , Montpellier, France, INRA (Ed.);<br/>Duncan, P., Hewison, A., Houte, S., Rosoux, R., Tournebize, T., Dubs, F., Burel, F., Bretagnolle, V., Long-term changes in agricultural practices and wildfowling in an internationally important wetland, and their effects on the guild of wintering ducks (1999) J. Appl. Ecol., 36, pp. 11-23;<br/>Durham, R.S., Afton, A.D., Nest-site selection and success of mottled ducks on agricultural lands in southwest Louisiana (2003) Wildl. Soc. Bull., 31, pp. 433-442;<br/>Eadie, J., Elphick, C., Reinecke, K., Miller, M., Manley, S., Wildlife values of North American ricelands (2008) Conservation in Ricelands of North America, pp. 7-90. , The Rice Foundation, Stuttgart, Arkansas, S.W. Manley (Ed.);<br/>Elphick, C.S., Oring, L.W., Conservation implications of flooding rice fields on winter waterbird communities (2003) Agric. Ecosyst. Environ., 94, pp. 17-29;<br/>Elphick, C.S., Baicich, P., Parsons, K.C., Fasola, M., Mugica, L., The future for research on waterbirds in rice fields (2010) Waterbirds, 33, pp. 231-243;<br/>Elphick, C.S., Taft, O., Lourenço, P.M., Management of rice fields for birds during the non-growing season (2010) Waterbirds, 33, pp. 181-192;<br/>Elphick, C.S., Assessing conservation trade-offs: identifying the effects of flooding rice fields for waterbirds on non-target bird species (2004) Biol. Conserv., 117, pp. 105-110;<br/>Elphick, C.S., Landscape effects on waterbird densities in California rice fields: taxonomic differences, scale-dependence, and conservation implications (2008) Waterbirds, 31, pp. 62-69;<br/>Ernoul, L., Mesléard, F., Gaubert, P., Béchet, A., Limits to agri-environmental schemes uptake to mitigate human-wildlife conflict: lessons learned from Flamingos in the Camargue, southern France (2013) Int. J. Agric. Sustain., 12, pp. 23-36;<br/>World rice statistics (2013) Extracted from the public database, , Accessed on February 2013;<br/>Fasola, M., Ruiz, X., The value of rice fields as substitutes for natural wetlands for waterbirds in the Mediterranean region (1996) Colonial Waterbirds, 19, pp. 122-128;<br/>Feare, C.J., Role of wild birds in the spread of highly pathogenic avian influenza virus H5N1 and implications for global surveillance (2010) Avian Dis., 54, pp. 201-212;<br/>Ferrer, X., Els poblaments hivernals d'anàtids (1986) Història Natural dels Països Catalans, pp. 398-404. , Ocells, Fundació Enciclopèdia Catalana, S.A., Barcelona, Spain, 12, X. Ferrer, A. Martínez i Vilalta, J. Muntaner (Eds.);<br/>Ferreyra, H., Romano, M., Uhart, M., Recent and chronic exposure of wild ducks to lead in human-modified wetlands in Santa Fe Province, Argentina (2009) J. Wildl. Dis., 45, pp. 823-827;<br/>Figuerola, J., Green, A.J., Dispersal of aquatic organisms by waterbirds: a review of past research and priorities for future studies (2002) Freshwater Biol., 47, pp. 483-494;<br/>Finlayson, C., Davidson, N., (1999) Global Review of Wetland Resources and Priorities for Wetland Inventory, p. 15. , Preface iv Summary Report;<br/>Finlayson, C.M., Hollis, T., Dacis, T., Crivelli, A., Managing Mediterranean wetlands and their birds (1992) International Waterfowl and Wetland Research Bureau, , Special Publication 20, Slimbridge, United Kingdom;<br/>Fleskes, J.P., Yee, J.L., Casazza, M.L., Miller, M.R., Takekawa, J.Y., Orthmeyer, D.L., (2005) Waterfowl Distribution, Movements and Habitat Use Relative to Recent Habitat Changes in the Central Valley of California: A Cooperative Project to Investigate Impacts of the Central Valley Habitat Joint Venture and Changing Agricultural Practices on the Ecology of Wintering Waterfowl, , http://www.werc.usgs.gov/ProductDetails.aspx?.ID=3247, Dixon, California, USA, (accessed June 2013);<br/>Fleskes, J.P., Yee, J.L., Yarris, G.S., Miller, M.R., Casazza, M.L., Pintail and mallard survival in California relative to habitat, abundance, and hunting (2007) J. Wildl. Manag., 71, pp. 2238-2248;<br/>Fleskes, J.P., Miller, M.R., Yarris, G.S., Thomas, D.R., Eadie, J.M., Increased winter habitat improves body condition of ducks in the Central Valley of California (2009) 5th North American Duck Symposium, , http://www.northamericanducksymposium.org/docs/fleskes_oral.pdf, Accessed on June 2013;<br/>Fleskes, J.P., Halstead, B.J., Casazza, M.L., Coates, P.S., Kohl, J.D., Skalos, D.A., Waste rice seed in conventional and stripper-head harvested fields in California: implications for wintering waterfowl (2012) J. Fish Wildl. Manag., 3, pp. 266-275;<br/>Fleskes, J.P., Skalos, D.A., Farinha, M.A., Bird use of fields treated postharvest with two types of flooding in Tulare basin, California (2012) J. Fish Wildl. Manag., 3, pp. 164-174;<br/>Fraser, L.H., Keddy, P.A., (2005) The World's Largest Wetlands: Ecology and Conservation, , Cambridge University Press;<br/>Fu, Z.-Q., Huang, H., Chen, C., He, B.-L., Effect of irrigation depths on methane emission in rice-duck complex ecosystems (2006) J. Hunan Agri. Univ., 32, p. 632;<br/>Fujioka, M., Don Lee, S., Kurechi, M., Yoshida, H., Bird use of rice fields in Korea and Japan (2010) Waterbirds, 33, pp. 8-29;<br/>Furuno, T., (2001) The Power of Duck: Integrated Rice and Duck Farming, , Tagari Publications;<br/>Gauthier, G., Giroux, J.F., Reed, A., Béchet, A., Bélanger, L., Interactions between land use, habitat use, and population increase in greater snow geese: what are the consequences for natural wetlands? (2005) Glob. Change Biol., 11, pp. 856-868;<br/>Gauthier-Clerc, M., Lebarbenchon, C., Thomas, F., Recent expansion of highly pathogenic avian influenza H5N1: a critical review (2007) Ibis, 149, pp. 202-214;<br/>Grado, S.C., Hunt, K.M., Hutt, C.P., Santos, X.T., Kaminski, R.M., Economic impacts of waterfowl hunting in Mississippi derived from a state-based mail survey (2011) Hum. Dimens. Wildl., 16, pp. 100-113;<br/>Green, A.J., Elmberg, J., Ecosystem services provided by waterbirds (2014) Biol. Rev., 89, pp. 105-122;<br/>Greer, D.M., Dugger, B.D., Reinecke, K.J., Petrie, M.J., Depletion of rice as food of waterfowl wintering in the Mississippi Alluvial Valley (2009) J. Wildl. Manag., 73, pp. 1125-1133;<br/>Guadagnin, D.L., Peter, A.S., Rolon, A.S., Stenert, C., Maltchik, L., Does non-intentional flooding of rice fields after cultivation contribute to waterbird conservation in Southern Brazil? (2012) Waterbirds, 35, pp. 371-380;<br/>Guijt, I., Hinchcliffe, F., Melnyk, M., The hidden harvest: the value of wild resources in agricultural systems: a summary (1995) IIED;<br/>Guillemain, M., Corbin, J., Fritz, H., Interruptions of terrestrial feeding as a way to decrease the non-digestible fraction of the bolus: field observations and laboratory experiments in Mallard (1999) Wildfowl, 50, pp. 123-132;<br/>Guillemain, M., Fritz, H., Duncan, P., The importance of protected areas as nocturnal feeding grounds for dabbling ducks wintering in western France (2002) Biol. Conserv., 103, pp. 183-198;<br/>Halwart, M., Gupta, M.V., (2004) Culture of Fish in Ricefields, , FAO, The World Fish Center, Rome, Italy, Penang, Malaysia;<br/>Havens, J.H., Kaminski, R.M., Davis, J.B., Riffell, S., Winter abundance of waterfowl and waste rice in managed Arkansas rice fields (2009) Proc. Annu. Conf. Southeastern Assoc. Fish Wildl. Agencies, 63, pp. 41-46;<br/>Heath, M.F., Evans, M.I., Important bird areas in Europe: priority regions for conservation: Southern Europe (2000) Bird Life International Conservation, 2. , Birdlife International, Cambridge, UK;<br/>Hohman, W.L., Moore, J.L., Stark, T.M., Weisbrich, G.A., Coon, R.A., Breeding waterbird use of Louisiana rice fields in relation to planting practices (1994) Proc. Annu. Conf. Southeastern Assoc. Fish Wildl. Agencies, 48, pp. 31-37;<br/>Hohman, W.L., Stark, T.M., Moore, J.L., Food availability and feeding preferences of breeding fulvous whistling-ducks in Louisiana ricefields (1996) Wilson Bull., 108, pp. 137-150;<br/>Horgan, F.G., Overuse of pesticides in Asian rice paddies (2012) IRRI. Side Event, Ramsar CoP 11, , Wetlands International, Bucharest, Romania;<br/>Hossain, S.T., Sugimoto, H., Ahmed, G.J.U., Islam, M.R., Effect of integrated rice-duck farming on rice yield farm productivity, and rice-provisioning ability of farmers (2005) Asian J. Agric. Dev., 2, pp. 79-86;<br/>Huner, J.V., (1994) Freshwater Crayfish Aquaculture in North America, Europe, and Australia: Families Astacidae, Canbaridae and Parastacidae, , The Haworth Press, Binghamton, New York;<br/>IBAs, the global currency for site conservation (2013), Accessed on September 2013Etat des connaissances scientifiques et techniques et perspectives de recherche (2012) Proceedings of the First International Conference Organic Rice Farming and Production Systems;<br/>The IUCN Red List of Threatened Species (2014), accessed February 2013Ibáñez, C., Curcó, A., Riera, X., Ripoll, I., Sánchez, C., Influence on birds of rice field management practices during the growing season: a review and an experiment (2010) Waterbirds, 33, pp. 167-180;<br/>Kaminski, R.M., Davis, J.B., Essig, H.W., Gerard, P.D., Reinecke, K.J., True metabolizable energy for wood ducks from acorns compared to other waterfowl foods (2003) J. Wildl. Manag., 67, pp. 542-550;<br/>Kasahara, S., Koyama, K., Population trends of common wintering waterfowl in Japan: participatory monitoring data from 1996 to 2009 (2010) Ornithol. Sci., 9, pp. 23-36;<br/>Katayama, N., Amano, T., Naoe, S., Yamakita, T., Komatsu, I., Takagawa, S.I., Sato, N., Miyashita, T., Landscape heterogeneity-biodiversity relationship: effect of range size (2014) PLoS One, 9 (3);<br/>Katondo, J., Ecology of Anatidae and their damage to rice crops at Lower Moshi irrigation scheme, northern Tanzania (1996) Gibier Faune Sauvage, 13, pp. 737-750;<br/>King, S., Elphick, C.S., Guadagnin, D., Taft, O., Amano, T., Effects of landscape features on waterbird use of rice fields (2010) Waterbirds, 33, pp. 151-159;<br/>Krapu, G.L., Reinecke, K.J., Foraging ecology and nutrition (1992) Ecology and Management of Breeding Waterfowl, pp. 1-29. , University of Minnesota Press, Minneapolis, B.D.J. Batt, A.D. Afton, M.G. Anderson, C.D. Ankney, D.H. Johnson, J.A. Kadlec, G.L. Krapu (Eds.);<br/>Kross, J.P., Kaminski, R.M., Reinecke, K.J., Pearse, A.T., Conserving waste rice for wintering waterfowl in the Mississippi Alluvial Valley (2008) J. Wildl. Manag., 72, pp. 1383-1387;<br/>Kurechi, M., Restoring rice paddy wetland environments and the local sustainable society-project for achieving co-existence of rice paddy agriculture with waterbirds at Kabukuri-numa, Miyagi Prefecture, Japan (2007) Glob. Environ. Res., 11, pp. 141-152;<br/>Lane, S.J., Azuma, A., Higuchi, H., Wildfowl damage to agriculture in Japan (1998) Agric. Ecosyst. Environ., 70, pp. 69-77;<br/>Lawler, S.P., Dritz, D.A., Effects of rice straw and water management on riceland mosquitoes (2006) J. Med. Entomol., 43, pp. 828-832;<br/>Lawler, S.P., Rice fields as temporary wetlands: a review (2001) Isr. J. Zool., 47, pp. 513-528;<br/>Long, P., Huang, H., Liao, X., Fu, Z., Zheng, H., Chen, A., Chen, C., Mechanism and capacities of reducing ecological cost through rice-duck cultivation (2013) J. Sci. Food Agric., 93, pp. 2881-2891;<br/>Lourenço, P.M., Piersma, T., Waterbird densities in South European rice fields as a function of rice management (2009) Ibis, 151, pp. 196-199;<br/>Mañosa i Rifé, S., (1997) A Review on Rice Farming and Waterbird Conservation in Three Western Mediterranean Areas: the Camargue, the Ebro Delta, and the North-Western Po Plain, , Station Biologique La Tour du Valat Internal Report, Arles, France;<br/>MacMillan, D., Hanley, N., Daw, M., Costs and benefits of wild goose conservation in Scotland (2004) Biol. Conserv., 119, pp. 475-485;<br/>Madsen, J., Fox, A.D., Impacts of hunting disturbance on waterbirds-a review (1995) Wildl. Biol., 1, pp. 193-207;<br/>Malla, G., Climate change and its impact on Nepalese agriculture (2008) J. Agric. Environ., 9, pp. 62-71;<br/>Manley, S.W., Kaminski, R.M., Reinecke, K.J., Gerard, P.D., Waterbird foods in winter-managed ricefields in Mississippi (2004) J. Wildl. Manag., 68, pp. 74-83;<br/>Manley, S.W., Kaminski, R.M., Reinecke, K.J., Gerard, P.D., Agronomic implications of waterfowl management in Mississippi ricefields (2005) Wildl. Soc. Bull., 33, pp. 981-992;<br/>Marty, J.R., Davis, J.B., Kaminski, R.M., Brasher, M.G., Wang, G., Waterbird response to the migratory bird habitat initiative in Coastal Louisiana and Texas (2012) 5th North American Duck Symposium;<br/>Mateo, R., Guitart, R., Green, A.J., Determinants of lead shot, rice and grit ingestion in ducks and coots (2000) J. Wildl. Manag., 64, pp. 939-947;<br/>Mathevet, R., Mesléard, F., The origins and functioning of the private wildfowling lease system in a major Mediterranean wetland: the Camargue (Rhone river delta, southern France) (2002) Land Use Policy, 19, pp. 277-286;<br/>Mathevet, R., Bousquet, F., Le Page, C., Antona, M., Agent-based simulations of interactions between duck population, farming decisions and leasing of hunting rights in the Camargue (Southern France) (2003) Ecol. Model., 165, pp. 107-126;<br/>McNeil, R., Drapeau, P., Goss-Custard, J.D., The occurrence and adaptive significance of nocturnal habits in waterfowl (1992) Biol. Rev., 67, pp. 381-419;<br/>Men, B., (2010) Duck Farming Systems and Avian Influenza in the Mekong Delta of Viet Nam, , Report Submitted to FAO;<br/>Mendez del Villar, P., Bauer, J.M., Le riz en Afrique de l'Ouest: dynamiques, politiques et perspectives (2013) Cah. Agric., 22, pp. 334-336;<br/>Mesléard, F., Grillas, P., Tan Ham, L., Restoration of seasonally-flooded marshes in abandoned ricefields in the Camargue (southern France)-preliminary results on vegetation and use by ducks (1995) Ecol. Eng., 5, pp. 95-106;<br/>Mesléard, F., Garnero, S., Beck, N., Rosecchi, É., Uselessness and indirect negative effects of an insecticide on rice field invertebrates (2005) C. R. Biol., 328, pp. 955-962;<br/>Miles, A.K., Lawler, S.P., Dritz, D., Spring, S., Effects of mosquito larvicide on mallard ducklings and prey (2002) Wildl. Soc. Bull., 30, pp. 675-682;<br/>Miller, M.R., Garr, J.D., Coates, P.S., Changes in the status of harvested rice fields in the Sacramento Valley, California: implications for wintering waterfowl (2010) Wetlands, 30, pp. 939-947;<br/>Miller, M.L., Ringelman, K.M., Schank, J.C., Eadie, J.M., SWAMP: an agent-based model for wetland and waterfowl conservation management (2014) Simulation, 90, pp. 52-68;<br/>Miyabayashi, Y., Mundkur, T., Atlas of key sites for Anatidae in the East Asian Flyway (1999) Wetlands Int.;<br/>Moriguchi, S., Onuma, M., Goka, K., Potential risk map for avian influenza A virus invading Japan (2013) Divers. Distrib., 19, pp. 78-85;<br/>Musters, C., Kruk, M., De Graaf, H., Ter Keurs, W., Breeding birds as a farm product (2001) Conserv. Biol., 15, pp. 363-369;<br/>Muzaffar, S.B., Takekawa, J.Y., Prosser, D.J., Newman, S.H., Xiao, X., Rice production systems and avian influenza: interactions between mixed-farming systems, poultry and wild birds (2010) Waterbirds, 33, pp. 219-230;<br/>Natuhara, Y., Ecosystem services by paddy fields as substitutes of natural wetlands in Japan (2013) Ecol. Eng., 56, pp. 97-106;<br/>Navedo, J.G., Masero, J.A., Sanchez-Guzman, J.M., Abad-Gomez, J.M., Gutierrez, J.S., Sanson, E.G., Villegas, A., Moran, R., International importance of Extremadura, Spain, for overwintering migratory dabbling ducks: a role for reservoirs (2012) Bird Conserv. Int., 22, pp. 316-327;<br/>Navedo, J.G., Hahn, S., Parejo, M., Abad-Gómez, J.M., Gutiérrez, J.S., Villegas, A., Sánchez-Guzmán, J.M., Masero, J.A., Unravelling trophic subsidies of agroecosystems for biodiversity conservation: food consumption and nutrient recycling by waterbirds in Mediterranean rice fields (2015) Sci. Total Environ., 511, pp. 288-297;<br/>Naylor, R., Invasions in agriculture: assessing the cost of the golden apple snail in Asia (1996) Ambio, 25, pp. 443-448;<br/>Nelms, C.O., Twedt, D.J., Seed deterioration in flooded agricultural fields during winter (1996) Wildl. Soc. Bull., 24, pp. 85-88;<br/>Oerke, E.-C., Crop losses to pests (2006) J. Agric. Sci., 144, pp. 31-43;<br/>Oltra, C., Dies, J.I., García, F.J., Dies, B., Catalá, F.J., Anátidas Invernantes en el Parc Natural de L'Albufera de València: Descripción y Factores Ambientales Implicados (2001) Spartina, 4, pp. 1-20;<br/>Ortiz-Monasterio, I., Wassmann, R., Govaerts, B., Hosen, Y., Katayanagi, N., Verhulst, N., Greenhouse gas mitigation in the main cereal systems: rice, wheat, and maize (2010) Climate Change and Crop Production, pp. 151-176. , CABI Publishing, Wallingford, UK, M.P. Reynolds (Ed.);<br/>Parsons, K.C., Mineau, P., Renfrew, R.B., Effects of pesticide use in rice fields on birds (2010) Waterbirds, 33, pp. 193-218;<br/>Pearse, A.T., Kaminski, R.M., Reinecke, K.J., Dinsmore, S.J., Local and landscape associations between wintering dabbling ducks and wetland complexes in Mississippi (2012) Wetlands, 325, pp. 859-869;<br/>Perennou, C., Beltrame, C., Guelmami, A., Vives, P.T., Caessteker, P., Existing areas and past changes of wetland extent in the Mediterranean region: an overview (2012) Ecol. Mediterranea, 38, pp. 53-66;<br/>Pernollet, C.A., Guelmami, A., Green, A.J., Curcó Masip, A., Dies, B., Bogliani, G., Tesio, F., Guillemain, M., A comparison of wintering duck numbers among European rice production areas with contrasting flooding regimes (2015) Biol. Conserv., 186, pp. 214-224;<br/>Petrie, M., Brasher, M., Dale, J., (2014) Estimating the Biological and Economic Contributions that Rice Habitats Make in Support of North American Waterfowl Populations, , A Report to the Rice Foundation from Ducks Unlimited Inc;<br/>Phalan, B., Bertzky, M., Butchart, S.H., Donald, P.F., Scharlemann, J.P., Stattersfield, A.J., Balmford, A., Crop expansion and conservation priorities in tropical countries (2013) PLoS One, 8, p. e51759;<br/>Phillips, J.C., A natural history of the ducks (1923) The Genus Anas, 2. , Houghton Mifflin Co., Boston, USA;<br/>Pierluissi, S., Breeding waterbirds in rice fields: a global review (2010) Waterbirds, 33, pp. 123-132;<br/>Pirot, J.-Y., (1981) Exploitation alimentaire nocturne des grands types de milieux camarguais par cinq espèces de canards de surface en hivernage et en transit, , Rapport Annuel act. 4, O.N.C./C.N.R.S;<br/>Ponçon, N., Balenghien, T., Toty, C., Ferré, J.B., Thomas, C., Dervieux, A., L'Ambert, G., Fontenille, D., Effects of local anthropogenic changes on potential malaria vector Anopheles hyrcanus and West Nile virus vector Culex modestus, Camargue, France (2007) Emerging Infect. Dis., 13, pp. 1810-1815;<br/>Pontius, J., Dilts, R., Bartlett, A., (2002) From Farmer Field School to Community IPM: Ten Years of Ipm Training in Asia, , FAO Community IPM Programme, Food and Agriculture Organization of the United Nations;<br/>Post, D., Taylor, J., Kitchell, J., Olson, M., Schindler, D., Herwig, B., The role of migratory waterfowl as nutrient vectors in a managed wetland (1998) Conserv. Biol., 12, pp. 910-920;<br/>Powers, K.D., Noble, R.E., Chabreck, R.H., Seed distribution by waterfowl in southwestern Louisiana (1978) J. Wildl. Manag., 42, pp. 598-615;<br/>Röling, N.G., Van de Fliert, E., Introducing integrated pest management in rice in Indonesia: a pioneering attempt to facilitate large-scale change (1998) Facilitating Sustainable Agriculture: Participatory Learning and Adaptive Management in Times of Environmental Uncertainty, pp. 153-171. , Cambridge University Press, Cambridge, N.G. Röling, M.A.E. Wagemakers (Eds.);<br/>Rave, D.P., Cordes, C.L., Time-activity budget of Northern Pintails using nonhunted rice fields in Southwest Louisiana (1993) J. Field Ornithol., 64, pp. 211-218;<br/>Rebelo, L.-M., McCartney, M., Finlayson, C., Wetlands of Sub-Saharan Africa: distribution and contribution of agriculture to livelihoods (2010) Wetlands Ecol. Manag., 18, pp. 557-572;<br/>Rendón, M.A., Green, A.J., Aguilera, E., Almaraz, P., Status, distribution and long-term changes in the waterbird community wintering in Donana, south-west Spain (2008) Biol. Conserv., 141, pp. 1371-1388;<br/>Rodenburg, J., Johnson, D., Weed management in rice-based cropping systems in Africa (2009) Adv. Agron., 103, pp. 149-218;<br/>Roh, K., Ko, B., Shim, K., Evaluation of the influence of the rice-duck farming system on regional environment at Hongsung Area (2009) 9th International Conference of The East and Southeast Asia Federation of Soil Science Societies S6P19, pp. 651-652;<br/>Schuyt, K.D., Economic consequences of wetland degradation for local populations in Africa (2005) Ecol. Econ., 53, pp. 177-190;<br/>Sesser, K.A., Reiter, M.E., Skalos, D.A., Strum, K.M., Hickey, C.M., (2014) Waterbird Response to Practices Aimed at Reducing Greenhouse Gas Emissions from Rice Fields in The Sacramento Valley, , Report to the Environmental Defense Fund;<br/>Shimada, T., Bowman, A., Ishida, M., Effects of flooding on a wetland bird community (2000) Ecol. Res., 15, pp. 229-235;<br/>Stafford, J.D., Kaminski, R.M., Reinecke, K.J., Manley, S.W., Waste rice for waterfowl in the Mississippi Alluvial Valley (2006) J. Wildl. Manag., 70, pp. 61-69;<br/>Stafford, J.D., Kaminski, R.M., Reinecke, K.J., Avian foods, foraging and habitat conservation in world rice fields (2010) Waterbirds, 33, pp. 133-150;<br/>Subramanian, S., Nair, N.S., Sundaram, R.N.S., (1996) Technology for Duck-Fish Integrated Faming System in Goa. ICAR Research Complex for Goa Technical Folder 10, , Ela, Old Goa;<br/>Suh, J., Theory and reality of integrated rice-duck farming in Asian developing countries: a systematic review and SWOT analysis (2014) Agric. Syst., 125, pp. 74-81;<br/>Suh, J., An institutional and policy framework to foster integrated rice-duck farming in Asian developing countries (2014) Int. J. Agric. Sustain., pp. 1-14;<br/>Sullivan, B.L., Aycrigg, J.L., Barry, J.H., Bonney, R.E., Bruns, N., Cooper, C.B., Damoulas, T., Kelling, S., The eBird enterprise: an integrated approach to development and application of citizen science (2014) Biol. Conserv., 169, pp. 31-40;<br/>Sundar, K.G., Subramanya, S., Bird use of rice fields in the Indian subcontinent (2010) Waterbirds, 33, pp. 44-70;<br/>Taft, O., Elphick, C., Waterbirds on working lands: literature review and bibliography development (2007) Technical Report, , http://www.audubon.org/bird/waterbirds/downloads.html, New York, New York (accessed January 2013);<br/>Tai, C., Tai, J.-J.L., Future prospects of duck production in Asia (2001) J. Poult. Sci., 38, pp. 99-112;<br/>Tajiri, H., Ohkawara, K., The effects of flooding and plowing on foraging site selection by wintering dabbling ducks in rice fields (2013) Ornithol. Sci., 12, pp. 127-136;<br/>Tajiri, H., Sakurai, Y., Tagome, K., Nakano, Y., Yamamoto, Y., Ikeda, T., Yamamura, Y., Ohkawara, K., Foraging site selection and conservation of the Baikal Teal in rice fields around Katano-kamoike, Kaga City Japan (2014) Ornithol. Sci., 631;<br/>Tamisier, A., Dehorter, O., (1999) Camargue, canards et foulques: Fonctionnement et devenir d'un prestigieux quartier d'hiver, , Centre ornithologique du Gard Nîmes, France;<br/>Taylor, I.R., Schultz, M.C., Waterbird use of rice fields in Australia (2010) Waterbirds, 33, pp. 71-82;<br/>BirdReturns Project (2014), Accessed October 2014Tietje, W., Teer, J., Winter feeding ecology of northern shovelers on freshwater and saline wetlands in south Texas (1996) J. Wildl. Manag., 60, pp. 843-855;<br/>Toral, G.M., Figuerola, J., Unraveling the importance of rice fields for waterbird populations in Europe (2010) Biodivers. Conserv., 19, pp. 3459-3469;<br/>Toral, G.M., Aragonés, D., Bustamante, J., Figuerola, J., Using Landsat images to map habitat availability for waterbirds in rice fields (2011) Ibis, 153, pp. 684-694;<br/>Tourenq, C., Bennetts, R.E., Kowalski, H., Vialet, E., Lucchesi, J.-L., Kayser, Y., Isenmann, P., Are ricefields a good alternative to natural marshes for waterbird communities in the Camargue, southern France? (2001) Biol. Conserv., 100, pp. 335-343;<br/>Tourenq, C., Aulagnier, S., Durieux, L., Lek, S., Mesleard, F., Johnson, A., Martin, J.L., Identifying rice fields at risk from damage by the greater flamingo (2001) J. Appl. Ecol., 38, pp. 170-179;<br/>Tourenq, C., Sadoul, N., Beck, N., Mesléard, F., Martin, J.-L., Effects of cropping practices on the use of rice fields by waterbirds in the Camargue, France (2003) Agric. Ecosyst. Environ., 95, pp. 543-549;<br/>Tréca, B., (1992) Water Birds and Rice Cultivation in West Africa, pp. 297-301. , Proceeding VII, Pan African Ornithological Congress;<br/>Twedt, D.J., Nelms, C.O., Waterfowl density on agricultural fields managed to retain water in winter (1999) Wildl. Soc. Bull., 27, pp. 924-930;<br/>Division of Bird Habitat Conservation (2014) North American Waterfowl Management Plan, , Accessed September 2013;<br/>Van Groenigen, J., Burns, E., Eadie, J., Horwath, W., Van Kessel, C., Effects of foraging waterfowl in winter flooded rice fields on weed stress and residue decomposition (2003) Agric. Ecosyst. Environ., 95, pp. 289-296;<br/>Van Nguyen, N., Ferrero, A., Meeting the challenges of global rice production (2006) Paddy Water Environ., 4 (1), pp. 1-9;<br/>Verhulst, J., Kleijn, D., Berendse, F., Direct and indirect effects of the most widely implemented Dutch agri-environment schemes on breeding waders (2007) J. Appl. Ecol., 44, pp. 70-80;<br/>Vickery, J., Watkinson, A., Sutherland, W., The solutions to the brent goose problem: an economic analysis (1994) J. Appl. Ecol., 31, pp. 371-382;<br/>Wagner, K.K., Schmidt, R.H., Conover, M.R., Compensation programs for wildlife damage in North America (1997) Wildl. Soc. Bull., 25, pp. 312-319;<br/>Washitani, I., Traditional sustainable ecosystem 'SATOYAMA' and biodiversity crisis in Japan: conservation ecological perspective (2001) Glob. Environ. Res., 5, pp. 119-133;<br/>Whelan, C.J., Wenny, D.G., Marquis, R.J., Ecosystem services provided by birds (2008) Ann. N. Y. Acad. Sci., 1134, pp. 25-60;<br/>Wood, C., Qiao, Y., Li, P., Ding, P., Lu, B., Xi, Y., Implications of rice agriculture for wild birds in China (2010) Waterbirds, 33, pp. 30-43;<br/>Wymenga, E., Zwarts, L., Use of rice fields by birds in West Africa (2010) Waterbirds, 33, pp. 97-104;<br/>Yusa, Y., Sugiura, N., Wada, T., Predatory potential of freshwater animals on an invasive agricultural pest, the apple snail Pomacea canaliculata (Gastropoda: Ampullariidae), in southern Japan (2006) Biol. Invasions, 8, pp. 137-147;<br/>Zhang, J.-E., Ouyang, Y., Huang, Z.-X., Characterization of nitrous oxide emission from a rice-duck farming system in south China (2008) Arch. Environ. Contam. Toxicol., 54, pp. 167-172</p>
N1  - <p>References: Acosta, M., Mugica, L., Blanco, D., López-Lanús, B., Dias, R.A., Doodnath, L.W., Hurtado, J., Birds of rice fields in the Americas (2010) Waterbirds, 33, pp. 105-122; <br/>Adzitey, F., Adzitey, S., Duck production: Has a potential to reduce poverty among rural households in Asian communities-a review (2011) Worlds Poult. Res., 1, pp. 7-10;<br/>Ahmadi, N., Bouman, B., Riz et rizicultures, enjeux économiques, écologiques et scientifiques (2013) Cah. Agric., 22, pp. 333-335;<br/>Amano, T., Ushiyama, K., Fujita, G., Higuchi, H., Factors affecting rice grain density unconsumed by white-fronted geese in relation to wheat damage (2004) Agric. Ecosyst. Environ., 102, pp. 403-407;<br/>Amano, T., Ushiyama, K., Moriguchi, S., Fujita, G., Higuchi, H., Decision-making in group foragers with incomplete information: test of individual-based model in geese (2006) Ecol. Monogr., 76, pp. 601-616;<br/>Amano, T., Kusumoto, Y., Tokuoka, Y., Yamada, S., Kim, E.-Y., Yamamoto, S., Spatial and temporal variations in the use of rice-paddy dominated landscapes by birds in Japan (2008) Biol. Conserv., 141, pp. 1704-1716;<br/>Amano, T., Kusumoto, Y., Okamura, H., Baba, Y.G., Hamasaki, K., Tanaka, K., Yamamoto, S., A macro-scale perspective on within farm management: how climate and topography alter the effect of farming practices (2011) Ecol. Lett., 14, pp. 1263-1272;<br/>Amano, T., Avian responses to heterogeneity in rice fields at local, landscape and macro scales (2014) Ornithol. Sci., 7;<br/>Anders, M.M., Van Kessel, K., Eadie, J.M., Agronomic impacts of winter wetland and waterfowl management in ricelands (2008) Conservation in Ricelands of North America, pp. 91-117. , The Rice Foundation, Stuttgart, Arkansas, S.W. Manley (Ed.);<br/>Arzel, C., Guillemain, M., Gurd, D., Elmberg, J., Fritz, H., Arnaud, A., Pin, C., Bosca, F., Experimental functional response and inter-individual variation in foraging rate of teal (Anas crecca) (2007) Behav. Process., 75, pp. 66-71;<br/>Baki, B., Chin, D., Mortimer, M., (2000) Wild and Weedy Rice in Rice Ecosystems in Asia-A Review, , International Rice Research Institute;<br/>Baldassarre, G.A., Bolen, E.G., Field-feeding ecology of waterfowl wintering on the Southern High Plains of Texas (1984) J. Wildl. Manag., 48, pp. 63-71;<br/>Balmford, A., Green, R., Phalan, B., What conservationists need to know about farming (2012) Proc. R. Soc. B, 279, pp. 2714-2724;<br/>Barroga, R., Gicana, N., Barroga, A., Socio-economic evaluation of rice-duck farming system in Bukidnon (2007) Philipp. J. Vet. Anim. Sci., 33, pp. 47-72;<br/>Batzer, D.P., Resh, V., Wetland management strategies that enhance waterfowl habitats can also control mosquitoes (1992) J. Am. Mosq. Control Assoc., 8, pp. 117-125;<br/>Bellio, M., Kingsford, R., Kotagama, S., Natural versus artificial-wetlands and their waterbirds in Sri Lanka (2009) Biol. Conserv., 142, pp. 3076-3085;<br/>Bird, J., Pettygrove, G., Eadie, J., The impact of waterfowl foraging on the decomposition of rice straw: mutual benefits for rice growers and waterfowl (2000) J. Appl. Ecol., 37, pp. 728-741;<br/>Bird, J., Eagle, A., Horwath, W., Hair, M., Zilbert, E., van Kessel, C., Long-term studies find benefits, challenges in alternative rice straw management (2002) Calif. Agric., 56, pp. 69-75;<br/>Important Bird Areas factsheet: Jakhaly rice-fields (2014), accessed October 2014Important Bird Areas factsheet: Doho Rice Scheme (2014), Accessed October 2014Blanco, D.E., López-Lanús, B., Dias, R.A., Azpiroz, A., Rilla, F., (2006) Uso de arroceras por chorlos y playeros migratorios en el sur de América del Sur. Implicancias de conservación y manejo, , Wetlands International, Buenos Aires, Argentina;<br/>Brochet, A.-L., Guillemain, M., Fritz, H., Gauthier-Clerc, M., Green, A.J., The role of migratory ducks in the long-distance dispersal of native plants and the spread of exotic plants in Europe (2009) Ecography, 32, pp. 298-919;<br/>Brochet, A.-L., Gauthier-Clerc, M., Mathevet, R., Béchet, A., Mondain-Monval, J.-Y., Tamisier, A., Marsh management, reserve creation, hunting periods and carrying capacity for wintering ducks and coots (2009) Biodivers. Conserv., 18, pp. 1879-1894;<br/>Brochet, A.-L., Guillemain, M., Gauthier-Clerc, M., Fritz, H., Green, A.J., Endozoochory of Mediterranean aquatic plant seeds by teal after a period of desiccation: determinants of seed survival and influence of retention time on germinability and viability (2010) Aquat. Bot., 93, pp. 99-106;<br/>Brochet, A.-L., Mouronval, J.-B., Aubry, P., Gauthier-Clerc, M., Green, A.J., Fritz, H., Guillemain, M., Diet and feeding habitats of camargue dabbling ducks: what has changed since the 1960? (2012) Waterbirds, 35, pp. 555-576;<br/>Brogi, A., Pernollet, C.A., Gauthier-Clerc, M., Guillemain, M., Waterfowl foraging in winter-flooded rice fields: any agronomic benefits for farmers? (2015) Ambio, , (in press);<br/>Buler, J.J., Barrow, W.C., Randall, L., (2010) An Assessment of Wintering Waterfowl Use of Wetland Reserve Program Restored Wetlands in California Using NEXRAD Weather Radar: Final Report, , Final report to Natural Resources Conservation Service;<br/>Byun, C., Kwon, G.J., Lee, D., Wojdak, J.M., Kim, J.G., Ecological assessment of plant succession and water quality in abandoned rice fields (2008) J. Ecol. Field Biol., 31, pp. 213-223;<br/>Bywater, V., Ribot, R., Buttemer, B., Bennett, A.T.D., Waterfowl utilize different habitat at night: implications for conservation (2014) Ornithol. Sci., 27;<br/>COLTIVAZIONE RISO NATURALE dalla parte della biodiversita (24'). Progetto finanziato nell'ambito del programma regionale di ricerca in campo agricolo 2007-2010 (2010) Regione Lombardia Direzione GeneraleAgricoltura, , Una realizzanione White Fox;<br/>Chamberlain, D.E., Crick, H.Q., Population declines and reproductive performance of skylarks Alauda arvensis in different regions and habitats of the United Kingdom (1999) Ibis, 141, pp. 38-51;<br/>Chan, S.-F., Severinghaus, L.L., Lee, C.-K., The effect of rice field fragmentation on wintering waterbirds at the landscape level (2007) J. Ornithol., 148, pp. 333-342;<br/>Cheng-fang, L., Cou-gui, C., Jin-ping, W., Ming, Z., Wei-ling, Y., Ahmad, S., Nitrogen losses from integrated rice-duck and rice-fish ecosystems in southern China (2008) Plant Soil, 307, pp. 207-217;<br/>Choi, J.H., Yoo, J.C., Use of rice fields by bean geese Anser fabalis and white-fronted geese Anser albifrons wintering in Hangang River Estuary according to post-harvest treatment (2014) Ornithol. Sci., 612;<br/>Comín, F.A., Romero, J.A., Hernández, O., Menéndez, M., Restoration of wetlands from abandoned rice fields for nutrient removal, and biological community and landscape diversity (2001) Restor. Ecol., 9, pp. 201-208;<br/>Cox, R.R., Afton, A.D., Use of habitats by female northern pintails wintering in southwestern Louisiana (1997) J. Wildl. Manag., 61, pp. 435-443;<br/>Czech, H.A., Parsons, K.C., Agricultural wetlands and waterbirds: a review (2002) Waterbirds, pp. 56-65;<br/>Davidson, N.C., How much wetland has the world lost? Long-term and recent trends in global wetland area (2014) Mar. Freshwater Res., 65, pp. 934-941;<br/>Day, J.H., Colwell, M.A., Waterbird communities in rice fields subjected to different post-harvest treatments (1998) Colon. Waterbird, 21, pp. 185-197;<br/>De Grazio, J.W., World bird damage problems (1978) Proceedings of 8th Vertebrate Pest Conference, pp. 9-24. , Davis, California, W.E. Howard (Ed.);<br/>De Mey, Y., Demont, M., Diagne, M., Estimating bird damage to rice in Africa: evidence from the Senegal River Valley (2012) J. Agric. Econ., 63, pp. 175-200;<br/>De Vlaming, V., Proctor, V.W., Dispersal of aquatic organisms: viability of seeds recovered from the droppings of captive killdeer and mallard ducks (1968) Am. J. Bot., 55, pp. 20-26;<br/>Dessborn, L., Brochet, A., Elmberg, J., Legagneux, P., Gauthier-Clerc, M., Guillemain, M., Geographical and temporal patterns in the diet of pintail Anas acuta, wigeon Anas penelope, mallard Anas platyrhynchos and teal Anas crecca in the Western Palearctic (2011) Eur. J. Wildl. Res., 57, pp. 1119-1129;<br/>Movements and resource utilization of four species of ducks captured in the mid-Parana River Basin, Corrientes Province, Argentina (2012) Final Report Submitted to Tudor Farms, Cambridge, Maryland, USA;<br/>Donald, P., Green, R., Heath, M., Agricultural intensification and the collapse of Europe's farmland bird populations (2001) Proc. R. Soc. B, 268, pp. 25-29;<br/>Donald, P.F., Biodiversity impacts of some agricultural commodity production systems (2004) Conserv. Biol., 18, pp. 17-38;<br/>Dufumier, M., Les systèmes de riziculture alternatifs dans le monde (2012) Les dossiers de conférence. 1ère conférence internationale. Les systèmes de production rizicole biologique. 27-30 aot 2012, pp. 27-31. , Montpellier, France, INRA (Ed.);<br/>Duncan, P., Hewison, A., Houte, S., Rosoux, R., Tournebize, T., Dubs, F., Burel, F., Bretagnolle, V., Long-term changes in agricultural practices and wildfowling in an internationally important wetland, and their effects on the guild of wintering ducks (1999) J. Appl. Ecol., 36, pp. 11-23;<br/>Durham, R.S., Afton, A.D., Nest-site selection and success of mottled ducks on agricultural lands in southwest Louisiana (2003) Wildl. Soc. Bull., 31, pp. 433-442;<br/>Eadie, J., Elphick, C., Reinecke, K., Miller, M., Manley, S., Wildlife values of North American ricelands (2008) Conservation in Ricelands of North America, pp. 7-90. , The Rice Foundation, Stuttgart, Arkansas, S.W. Manley (Ed.);<br/>Elphick, C.S., Oring, L.W., Conservation implications of flooding rice fields on winter waterbird communities (2003) Agric. Ecosyst. Environ., 94, pp. 17-29;<br/>Elphick, C.S., Baicich, P., Parsons, K.C., Fasola, M., Mugica, L., The future for research on waterbirds in rice fields (2010) Waterbirds, 33, pp. 231-243;<br/>Elphick, C.S., Taft, O., Lourenço, P.M., Management of rice fields for birds during the non-growing season (2010) Waterbirds, 33, pp. 181-192;<br/>Elphick, C.S., Assessing conservation trade-offs: identifying the effects of flooding rice fields for waterbirds on non-target bird species (2004) Biol. Conserv., 117, pp. 105-110;<br/>Elphick, C.S., Landscape effects on waterbird densities in California rice fields: taxonomic differences, scale-dependence, and conservation implications (2008) Waterbirds, 31, pp. 62-69;<br/>Ernoul, L., Mesléard, F., Gaubert, P., Béchet, A., Limits to agri-environmental schemes uptake to mitigate human-wildlife conflict: lessons learned from Flamingos in the Camargue, southern France (2013) Int. J. Agric. Sustain., 12, pp. 23-36;<br/>World rice statistics (2013) Extracted from the public database, , Accessed on February 2013;<br/>Fasola, M., Ruiz, X., The value of rice fields as substitutes for natural wetlands for waterbirds in the Mediterranean region (1996) Colonial Waterbirds, 19, pp. 122-128;<br/>Feare, C.J., Role of wild birds in the spread of highly pathogenic avian influenza virus H5N1 and implications for global surveillance (2010) Avian Dis., 54, pp. 201-212;<br/>Ferrer, X., Els poblaments hivernals d'anàtids (1986) Història Natural dels Països Catalans, pp. 398-404. , Ocells, Fundació Enciclopèdia Catalana, S.A., Barcelona, Spain, 12, X. Ferrer, A. Martínez i Vilalta, J. Muntaner (Eds.);<br/>Ferreyra, H., Romano, M., Uhart, M., Recent and chronic exposure of wild ducks to lead in human-modified wetlands in Santa Fe Province, Argentina (2009) J. Wildl. Dis., 45, pp. 823-827;<br/>Figuerola, J., Green, A.J., Dispersal of aquatic organisms by waterbirds: a review of past research and priorities for future studies (2002) Freshwater Biol., 47, pp. 483-494;<br/>Finlayson, C., Davidson, N., (1999) Global Review of Wetland Resources and Priorities for Wetland Inventory, p. 15. , Preface iv Summary Report;<br/>Finlayson, C.M., Hollis, T., Dacis, T., Crivelli, A., Managing Mediterranean wetlands and their birds (1992) International Waterfowl and Wetland Research Bureau, , Special Publication 20, Slimbridge, United Kingdom;<br/>Fleskes, J.P., Yee, J.L., Casazza, M.L., Miller, M.R., Takekawa, J.Y., Orthmeyer, D.L., (2005) Waterfowl Distribution, Movements and Habitat Use Relative to Recent Habitat Changes in the Central Valley of California: A Cooperative Project to Investigate Impacts of the Central Valley Habitat Joint Venture and Changing Agricultural Practices on the Ecology of Wintering Waterfowl, , http://www.werc.usgs.gov/ProductDetails.aspx?.ID=3247, Dixon, California, USA, (accessed June 2013);<br/>Fleskes, J.P., Yee, J.L., Yarris, G.S., Miller, M.R., Casazza, M.L., Pintail and mallard survival in California relative to habitat, abundance, and hunting (2007) J. Wildl. Manag., 71, pp. 2238-2248;<br/>Fleskes, J.P., Miller, M.R., Yarris, G.S., Thomas, D.R., Eadie, J.M., Increased winter habitat improves body condition of ducks in the Central Valley of California (2009) 5th North American Duck Symposium, , http://www.northamericanducksymposium.org/docs/fleskes_oral.pdf, Accessed on June 2013;<br/>Fleskes, J.P., Halstead, B.J., Casazza, M.L., Coates, P.S., Kohl, J.D., Skalos, D.A., Waste rice seed in conventional and stripper-head harvested fields in California: implications for wintering waterfowl (2012) J. Fish Wildl. Manag., 3, pp. 266-275;<br/>Fleskes, J.P., Skalos, D.A., Farinha, M.A., Bird use of fields treated postharvest with two types of flooding in Tulare basin, California (2012) J. Fish Wildl. Manag., 3, pp. 164-174;<br/>Fraser, L.H., Keddy, P.A., (2005) The World's Largest Wetlands: Ecology and Conservation, , Cambridge University Press;<br/>Fu, Z.-Q., Huang, H., Chen, C., He, B.-L., Effect of irrigation depths on methane emission in rice-duck complex ecosystems (2006) J. Hunan Agri. Univ., 32, p. 632;<br/>Fujioka, M., Don Lee, S., Kurechi, M., Yoshida, H., Bird use of rice fields in Korea and Japan (2010) Waterbirds, 33, pp. 8-29;<br/>Furuno, T., (2001) The Power of Duck: Integrated Rice and Duck Farming, , Tagari Publications;<br/>Gauthier, G., Giroux, J.F., Reed, A., Béchet, A., Bélanger, L., Interactions between land use, habitat use, and population increase in greater snow geese: what are the consequences for natural wetlands? (2005) Glob. Change Biol., 11, pp. 856-868;<br/>Gauthier-Clerc, M., Lebarbenchon, C., Thomas, F., Recent expansion of highly pathogenic avian influenza H5N1: a critical review (2007) Ibis, 149, pp. 202-214;<br/>Grado, S.C., Hunt, K.M., Hutt, C.P., Santos, X.T., Kaminski, R.M., Economic impacts of waterfowl hunting in Mississippi derived from a state-based mail survey (2011) Hum. Dimens. Wildl., 16, pp. 100-113;<br/>Green, A.J., Elmberg, J., Ecosystem services provided by waterbirds (2014) Biol. Rev., 89, pp. 105-122;<br/>Greer, D.M., Dugger, B.D., Reinecke, K.J., Petrie, M.J., Depletion of rice as food of waterfowl wintering in the Mississippi Alluvial Valley (2009) J. Wildl. Manag., 73, pp. 1125-1133;<br/>Guadagnin, D.L., Peter, A.S., Rolon, A.S., Stenert, C., Maltchik, L., Does non-intentional flooding of rice fields after cultivation contribute to waterbird conservation in Southern Brazil? (2012) Waterbirds, 35, pp. 371-380;<br/>Guijt, I., Hinchcliffe, F., Melnyk, M., The hidden harvest: the value of wild resources in agricultural systems: a summary (1995) IIED;<br/>Guillemain, M., Corbin, J., Fritz, H., Interruptions of terrestrial feeding as a way to decrease the non-digestible fraction of the bolus: field observations and laboratory experiments in Mallard (1999) Wildfowl, 50, pp. 123-132;<br/>Guillemain, M., Fritz, H., Duncan, P., The importance of protected areas as nocturnal feeding grounds for dabbling ducks wintering in western France (2002) Biol. Conserv., 103, pp. 183-198;<br/>Halwart, M., Gupta, M.V., (2004) Culture of Fish in Ricefields, , FAO, The World Fish Center, Rome, Italy, Penang, Malaysia;<br/>Havens, J.H., Kaminski, R.M., Davis, J.B., Riffell, S., Winter abundance of waterfowl and waste rice in managed Arkansas rice fields (2009) Proc. Annu. Conf. Southeastern Assoc. Fish Wildl. Agencies, 63, pp. 41-46;<br/>Heath, M.F., Evans, M.I., Important bird areas in Europe: priority regions for conservation: Southern Europe (2000) Bird Life International Conservation, 2. , Birdlife International, Cambridge, UK;<br/>Hohman, W.L., Moore, J.L., Stark, T.M., Weisbrich, G.A., Coon, R.A., Breeding waterbird use of Louisiana rice fields in relation to planting practices (1994) Proc. Annu. Conf. Southeastern Assoc. Fish Wildl. Agencies, 48, pp. 31-37;<br/>Hohman, W.L., Stark, T.M., Moore, J.L., Food availability and feeding preferences of breeding fulvous whistling-ducks in Louisiana ricefields (1996) Wilson Bull., 108, pp. 137-150;<br/>Horgan, F.G., Overuse of pesticides in Asian rice paddies (2012) IRRI. Side Event, Ramsar CoP 11, , Wetlands International, Bucharest, Romania;<br/>Hossain, S.T., Sugimoto, H., Ahmed, G.J.U., Islam, M.R., Effect of integrated rice-duck farming on rice yield farm productivity, and rice-provisioning ability of farmers (2005) Asian J. Agric. Dev., 2, pp. 79-86;<br/>Huner, J.V., (1994) Freshwater Crayfish Aquaculture in North America, Europe, and Australia: Families Astacidae, Canbaridae and Parastacidae, , The Haworth Press, Binghamton, New York;<br/>IBAs, the global currency for site conservation (2013), Accessed on September 2013Etat des connaissances scientifiques et techniques et perspectives de recherche (2012) Proceedings of the First International Conference Organic Rice Farming and Production Systems;<br/>The IUCN Red List of Threatened Species (2014), accessed February 2013Ibáñez, C., Curcó, A., Riera, X., Ripoll, I., Sánchez, C., Influence on birds of rice field management practices during the growing season: a review and an experiment (2010) Waterbirds, 33, pp. 167-180;<br/>Kaminski, R.M., Davis, J.B., Essig, H.W., Gerard, P.D., Reinecke, K.J., True metabolizable energy for wood ducks from acorns compared to other waterfowl foods (2003) J. Wildl. Manag., 67, pp. 542-550;<br/>Kasahara, S., Koyama, K., Population trends of common wintering waterfowl in Japan: participatory monitoring data from 1996 to 2009 (2010) Ornithol. Sci., 9, pp. 23-36;<br/>Katayama, N., Amano, T., Naoe, S., Yamakita, T., Komatsu, I., Takagawa, S.I., Sato, N., Miyashita, T., Landscape heterogeneity-biodiversity relationship: effect of range size (2014) PLoS One, 9 (3);<br/>Katondo, J., Ecology of Anatidae and their damage to rice crops at Lower Moshi irrigation scheme, northern Tanzania (1996) Gibier Faune Sauvage, 13, pp. 737-750;<br/>King, S., Elphick, C.S., Guadagnin, D., Taft, O., Amano, T., Effects of landscape features on waterbird use of rice fields (2010) Waterbirds, 33, pp. 151-159;<br/>Krapu, G.L., Reinecke, K.J., Foraging ecology and nutrition (1992) Ecology and Management of Breeding Waterfowl, pp. 1-29. , University of Minnesota Press, Minneapolis, B.D.J. Batt, A.D. Afton, M.G. Anderson, C.D. Ankney, D.H. Johnson, J.A. Kadlec, G.L. Krapu (Eds.);<br/>Kross, J.P., Kaminski, R.M., Reinecke, K.J., Pearse, A.T., Conserving waste rice for wintering waterfowl in the Mississippi Alluvial Valley (2008) J. Wildl. Manag., 72, pp. 1383-1387;<br/>Kurechi, M., Restoring rice paddy wetland environments and the local sustainable society-project for achieving co-existence of rice paddy agriculture with waterbirds at Kabukuri-numa, Miyagi Prefecture, Japan (2007) Glob. Environ. Res., 11, pp. 141-152;<br/>Lane, S.J., Azuma, A., Higuchi, H., Wildfowl damage to agriculture in Japan (1998) Agric. Ecosyst. Environ., 70, pp. 69-77;<br/>Lawler, S.P., Dritz, D.A., Effects of rice straw and water management on riceland mosquitoes (2006) J. Med. Entomol., 43, pp. 828-832;<br/>Lawler, S.P., Rice fields as temporary wetlands: a review (2001) Isr. J. Zool., 47, pp. 513-528;<br/>Long, P., Huang, H., Liao, X., Fu, Z., Zheng, H., Chen, A., Chen, C., Mechanism and capacities of reducing ecological cost through rice-duck cultivation (2013) J. Sci. Food Agric., 93, pp. 2881-2891;<br/>Lourenço, P.M., Piersma, T., Waterbird densities in South European rice fields as a function of rice management (2009) Ibis, 151, pp. 196-199;<br/>Mañosa i Rifé, S., (1997) A Review on Rice Farming and Waterbird Conservation in Three Western Mediterranean Areas: the Camargue, the Ebro Delta, and the North-Western Po Plain, , Station Biologique La Tour du Valat Internal Report, Arles, France;<br/>MacMillan, D., Hanley, N., Daw, M., Costs and benefits of wild goose conservation in Scotland (2004) Biol. Conserv., 119, pp. 475-485;<br/>Madsen, J., Fox, A.D., Impacts of hunting disturbance on waterbirds-a review (1995) Wildl. Biol., 1, pp. 193-207;<br/>Malla, G., Climate change and its impact on Nepalese agriculture (2008) J. Agric. Environ., 9, pp. 62-71;<br/>Manley, S.W., Kaminski, R.M., Reinecke, K.J., Gerard, P.D., Waterbird foods in winter-managed ricefields in Mississippi (2004) J. Wildl. Manag., 68, pp. 74-83;<br/>Manley, S.W., Kaminski, R.M., Reinecke, K.J., Gerard, P.D., Agronomic implications of waterfowl management in Mississippi ricefields (2005) Wildl. Soc. Bull., 33, pp. 981-992;<br/>Marty, J.R., Davis, J.B., Kaminski, R.M., Brasher, M.G., Wang, G., Waterbird response to the migratory bird habitat initiative in Coastal Louisiana and Texas (2012) 5th North American Duck Symposium;<br/>Mateo, R., Guitart, R., Green, A.J., Determinants of lead shot, rice and grit ingestion in ducks and coots (2000) J. Wildl. Manag., 64, pp. 939-947;<br/>Mathevet, R., Mesléard, F., The origins and functioning of the private wildfowling lease system in a major Mediterranean wetland: the Camargue (Rhone river delta, southern France) (2002) Land Use Policy, 19, pp. 277-286;<br/>Mathevet, R., Bousquet, F., Le Page, C., Antona, M., Agent-based simulations of interactions between duck population, farming decisions and leasing of hunting rights in the Camargue (Southern France) (2003) Ecol. Model., 165, pp. 107-126;<br/>McNeil, R., Drapeau, P., Goss-Custard, J.D., The occurrence and adaptive significance of nocturnal habits in waterfowl (1992) Biol. Rev., 67, pp. 381-419;<br/>Men, B., (2010) Duck Farming Systems and Avian Influenza in the Mekong Delta of Viet Nam, , Report Submitted to FAO;<br/>Mendez del Villar, P., Bauer, J.M., Le riz en Afrique de l'Ouest: dynamiques, politiques et perspectives (2013) Cah. Agric., 22, pp. 334-336;<br/>Mesléard, F., Grillas, P., Tan Ham, L., Restoration of seasonally-flooded marshes in abandoned ricefields in the Camargue (southern France)-preliminary results on vegetation and use by ducks (1995) Ecol. Eng., 5, pp. 95-106;<br/>Mesléard, F., Garnero, S., Beck, N., Rosecchi, É., Uselessness and indirect negative effects of an insecticide on rice field invertebrates (2005) C. R. Biol., 328, pp. 955-962;<br/>Miles, A.K., Lawler, S.P., Dritz, D., Spring, S., Effects of mosquito larvicide on mallard ducklings and prey (2002) Wildl. Soc. Bull., 30, pp. 675-682;<br/>Miller, M.R., Garr, J.D., Coates, P.S., Changes in the status of harvested rice fields in the Sacramento Valley, California: implications for wintering waterfowl (2010) Wetlands, 30, pp. 939-947;<br/>Miller, M.L., Ringelman, K.M., Schank, J.C., Eadie, J.M., SWAMP: an agent-based model for wetland and waterfowl conservation management (2014) Simulation, 90, pp. 52-68;<br/>Miyabayashi, Y., Mundkur, T., Atlas of key sites for Anatidae in the East Asian Flyway (1999) Wetlands Int.;<br/>Moriguchi, S., Onuma, M., Goka, K., Potential risk map for avian influenza A virus invading Japan (2013) Divers. Distrib., 19, pp. 78-85;<br/>Musters, C., Kruk, M., De Graaf, H., Ter Keurs, W., Breeding birds as a farm product (2001) Conserv. Biol., 15, pp. 363-369;<br/>Muzaffar, S.B., Takekawa, J.Y., Prosser, D.J., Newman, S.H., Xiao, X., Rice production systems and avian influenza: interactions between mixed-farming systems, poultry and wild birds (2010) Waterbirds, 33, pp. 219-230;<br/>Natuhara, Y., Ecosystem services by paddy fields as substitutes of natural wetlands in Japan (2013) Ecol. Eng., 56, pp. 97-106;<br/>Navedo, J.G., Masero, J.A., Sanchez-Guzman, J.M., Abad-Gomez, J.M., Gutierrez, J.S., Sanson, E.G., Villegas, A., Moran, R., International importance of Extremadura, Spain, for overwintering migratory dabbling ducks: a role for reservoirs (2012) Bird Conserv. Int., 22, pp. 316-327;<br/>Navedo, J.G., Hahn, S., Parejo, M., Abad-Gómez, J.M., Gutiérrez, J.S., Villegas, A., Sánchez-Guzmán, J.M., Masero, J.A., Unravelling trophic subsidies of agroecosystems for biodiversity conservation: food consumption and nutrient recycling by waterbirds in Mediterranean rice fields (2015) Sci. Total Environ., 511, pp. 288-297;<br/>Naylor, R., Invasions in agriculture: assessing the cost of the golden apple snail in Asia (1996) Ambio, 25, pp. 443-448;<br/>Nelms, C.O., Twedt, D.J., Seed deterioration in flooded agricultural fields during winter (1996) Wildl. Soc. Bull., 24, pp. 85-88;<br/>Oerke, E.-C., Crop losses to pests (2006) J. Agric. Sci., 144, pp. 31-43;<br/>Oltra, C., Dies, J.I., García, F.J., Dies, B., Catalá, F.J., Anátidas Invernantes en el Parc Natural de L'Albufera de València: Descripción y Factores Ambientales Implicados (2001) Spartina, 4, pp. 1-20;<br/>Ortiz-Monasterio, I., Wassmann, R., Govaerts, B., Hosen, Y., Katayanagi, N., Verhulst, N., Greenhouse gas mitigation in the main cereal systems: rice, wheat, and maize (2010) Climate Change and Crop Production, pp. 151-176. , CABI Publishing, Wallingford, UK, M.P. Reynolds (Ed.);<br/>Parsons, K.C., Mineau, P., Renfrew, R.B., Effects of pesticide use in rice fields on birds (2010) Waterbirds, 33, pp. 193-218;<br/>Pearse, A.T., Kaminski, R.M., Reinecke, K.J., Dinsmore, S.J., Local and landscape associations between wintering dabbling ducks and wetland complexes in Mississippi (2012) Wetlands, 325, pp. 859-869;<br/>Perennou, C., Beltrame, C., Guelmami, A., Vives, P.T., Caessteker, P., Existing areas and past changes of wetland extent in the Mediterranean region: an overview (2012) Ecol. Mediterranea, 38, pp. 53-66;<br/>Pernollet, C.A., Guelmami, A., Green, A.J., Curcó Masip, A., Dies, B., Bogliani, G., Tesio, F., Guillemain, M., A comparison of wintering duck numbers among European rice production areas with contrasting flooding regimes (2015) Biol. Conserv., 186, pp. 214-224;<br/>Petrie, M., Brasher, M., Dale, J., (2014) Estimating the Biological and Economic Contributions that Rice Habitats Make in Support of North American Waterfowl Populations, , A Report to the Rice Foundation from Ducks Unlimited Inc;<br/>Phalan, B., Bertzky, M., Butchart, S.H., Donald, P.F., Scharlemann, J.P., Stattersfield, A.J., Balmford, A., Crop expansion and conservation priorities in tropical countries (2013) PLoS One, 8, p. e51759;<br/>Phillips, J.C., A natural history of the ducks (1923) The Genus Anas, 2. , Houghton Mifflin Co., Boston, USA;<br/>Pierluissi, S., Breeding waterbirds in rice fields: a global review (2010) Waterbirds, 33, pp. 123-132;<br/>Pirot, J.-Y., (1981) Exploitation alimentaire nocturne des grands types de milieux camarguais par cinq espèces de canards de surface en hivernage et en transit, , Rapport Annuel act. 4, O.N.C./C.N.R.S;<br/>Ponçon, N., Balenghien, T., Toty, C., Ferré, J.B., Thomas, C., Dervieux, A., L'Ambert, G., Fontenille, D., Effects of local anthropogenic changes on potential malaria vector Anopheles hyrcanus and West Nile virus vector Culex modestus, Camargue, France (2007) Emerging Infect. Dis., 13, pp. 1810-1815;<br/>Pontius, J., Dilts, R., Bartlett, A., (2002) From Farmer Field School to Community IPM: Ten Years of Ipm Training in Asia, , FAO Community IPM Programme, Food and Agriculture Organization of the United Nations;<br/>Post, D., Taylor, J., Kitchell, J., Olson, M., Schindler, D., Herwig, B., The role of migratory waterfowl as nutrient vectors in a managed wetland (1998) Conserv. Biol., 12, pp. 910-920;<br/>Powers, K.D., Noble, R.E., Chabreck, R.H., Seed distribution by waterfowl in southwestern Louisiana (1978) J. Wildl. Manag., 42, pp. 598-615;<br/>Röling, N.G., Van de Fliert, E., Introducing integrated pest management in rice in Indonesia: a pioneering attempt to facilitate large-scale change (1998) Facilitating Sustainable Agriculture: Participatory Learning and Adaptive Management in Times of Environmental Uncertainty, pp. 153-171. , Cambridge University Press, Cambridge, N.G. Röling, M.A.E. Wagemakers (Eds.);<br/>Rave, D.P., Cordes, C.L., Time-activity budget of Northern Pintails using nonhunted rice fields in Southwest Louisiana (1993) J. Field Ornithol., 64, pp. 211-218;<br/>Rebelo, L.-M., McCartney, M., Finlayson, C., Wetlands of Sub-Saharan Africa: distribution and contribution of agriculture to livelihoods (2010) Wetlands Ecol. Manag., 18, pp. 557-572;<br/>Rendón, M.A., Green, A.J., Aguilera, E., Almaraz, P., Status, distribution and long-term changes in the waterbird community wintering in Donana, south-west Spain (2008) Biol. Conserv., 141, pp. 1371-1388;<br/>Rodenburg, J., Johnson, D., Weed management in rice-based cropping systems in Africa (2009) Adv. Agron., 103, pp. 149-218;<br/>Roh, K., Ko, B., Shim, K., Evaluation of the influence of the rice-duck farming system on regional environment at Hongsung Area (2009) 9th International Conference of The East and Southeast Asia Federation of Soil Science Societies S6P19, pp. 651-652;<br/>Schuyt, K.D., Economic consequences of wetland degradation for local populations in Africa (2005) Ecol. Econ., 53, pp. 177-190;<br/>Sesser, K.A., Reiter, M.E., Skalos, D.A., Strum, K.M., Hickey, C.M., (2014) Waterbird Response to Practices Aimed at Reducing Greenhouse Gas Emissions from Rice Fields in The Sacramento Valley, , Report to the Environmental Defense Fund;<br/>Shimada, T., Bowman, A., Ishida, M., Effects of flooding on a wetland bird community (2000) Ecol. Res., 15, pp. 229-235;<br/>Stafford, J.D., Kaminski, R.M., Reinecke, K.J., Manley, S.W., Waste rice for waterfowl in the Mississippi Alluvial Valley (2006) J. Wildl. Manag., 70, pp. 61-69;<br/>Stafford, J.D., Kaminski, R.M., Reinecke, K.J., Avian foods, foraging and habitat conservation in world rice fields (2010) Waterbirds, 33, pp. 133-150;<br/>Subramanian, S., Nair, N.S., Sundaram, R.N.S., (1996) Technology for Duck-Fish Integrated Faming System in Goa. ICAR Research Complex for Goa Technical Folder 10, , Ela, Old Goa;<br/>Suh, J., Theory and reality of integrated rice-duck farming in Asian developing countries: a systematic review and SWOT analysis (2014) Agric. Syst., 125, pp. 74-81;<br/>Suh, J., An institutional and policy framework to foster integrated rice-duck farming in Asian developing countries (2014) Int. J. Agric. Sustain., pp. 1-14;<br/>Sullivan, B.L., Aycrigg, J.L., Barry, J.H., Bonney, R.E., Bruns, N., Cooper, C.B., Damoulas, T., Kelling, S., The eBird enterprise: an integrated approach to development and application of citizen science (2014) Biol. Conserv., 169, pp. 31-40;<br/>Sundar, K.G., Subramanya, S., Bird use of rice fields in the Indian subcontinent (2010) Waterbirds, 33, pp. 44-70;<br/>Taft, O., Elphick, C., Waterbirds on working lands: literature review and bibliography development (2007) Technical Report, , http://www.audubon.org/bird/waterbirds/downloads.html, New York, New York (accessed January 2013);<br/>Tai, C., Tai, J.-J.L., Future prospects of duck production in Asia (2001) J. Poult. Sci., 38, pp. 99-112;<br/>Tajiri, H., Ohkawara, K., The effects of flooding and plowing on foraging site selection by wintering dabbling ducks in rice fields (2013) Ornithol. Sci., 12, pp. 127-136;<br/>Tajiri, H., Sakurai, Y., Tagome, K., Nakano, Y., Yamamoto, Y., Ikeda, T., Yamamura, Y., Ohkawara, K., Foraging site selection and conservation of the Baikal Teal in rice fields around Katano-kamoike, Kaga City Japan (2014) Ornithol. Sci., 631;<br/>Tamisier, A., Dehorter, O., (1999) Camargue, canards et foulques: Fonctionnement et devenir d'un prestigieux quartier d'hiver, , Centre ornithologique du Gard Nîmes, France;<br/>Taylor, I.R., Schultz, M.C., Waterbird use of rice fields in Australia (2010) Waterbirds, 33, pp. 71-82;<br/>BirdReturns Project (2014), Accessed October 2014Tietje, W., Teer, J., Winter feeding ecology of northern shovelers on freshwater and saline wetlands in south Texas (1996) J. Wildl. Manag., 60, pp. 843-855;<br/>Toral, G.M., Figuerola, J., Unraveling the importance of rice fields for waterbird populations in Europe (2010) Biodivers. Conserv., 19, pp. 3459-3469;<br/>Toral, G.M., Aragonés, D., Bustamante, J., Figuerola, J., Using Landsat images to map habitat availability for waterbirds in rice fields (2011) Ibis, 153, pp. 684-694;<br/>Tourenq, C., Bennetts, R.E., Kowalski, H., Vialet, E., Lucchesi, J.-L., Kayser, Y., Isenmann, P., Are ricefields a good alternative to natural marshes for waterbird communities in the Camargue, southern France? (2001) Biol. Conserv., 100, pp. 335-343;<br/>Tourenq, C., Aulagnier, S., Durieux, L., Lek, S., Mesleard, F., Johnson, A., Martin, J.L., Identifying rice fields at risk from damage by the greater flamingo (2001) J. Appl. Ecol., 38, pp. 170-179;<br/>Tourenq, C., Sadoul, N., Beck, N., Mesléard, F., Martin, J.-L., Effects of cropping practices on the use of rice fields by waterbirds in the Camargue, France (2003) Agric. Ecosyst. Environ., 95, pp. 543-549;<br/>Tréca, B., (1992) Water Birds and Rice Cultivation in West Africa, pp. 297-301. , Proceeding VII, Pan African Ornithological Congress;<br/>Twedt, D.J., Nelms, C.O., Waterfowl density on agricultural fields managed to retain water in winter (1999) Wildl. Soc. Bull., 27, pp. 924-930;<br/>Division of Bird Habitat Conservation (2014) North American Waterfowl Management Plan, , Accessed September 2013;<br/>Van Groenigen, J., Burns, E., Eadie, J., Horwath, W., Van Kessel, C., Effects of foraging waterfowl in winter flooded rice fields on weed stress and residue decomposition (2003) Agric. Ecosyst. Environ., 95, pp. 289-296;<br/>Van Nguyen, N., Ferrero, A., Meeting the challenges of global rice production (2006) Paddy Water Environ., 4 (1), pp. 1-9;<br/>Verhulst, J., Kleijn, D., Berendse, F., Direct and indirect effects of the most widely implemented Dutch agri-environment schemes on breeding waders (2007) J. Appl. Ecol., 44, pp. 70-80;<br/>Vickery, J., Watkinson, A., Sutherland, W., The solutions to the brent goose problem: an economic analysis (1994) J. Appl. Ecol., 31, pp. 371-382;<br/>Wagner, K.K., Schmidt, R.H., Conover, M.R., Compensation programs for wildlife damage in North America (1997) Wildl. Soc. Bull., 25, pp. 312-319;<br/>Washitani, I., Traditional sustainable ecosystem 'SATOYAMA' and biodiversity crisis in Japan: conservation ecological perspective (2001) Glob. Environ. Res., 5, pp. 119-133;<br/>Whelan, C.J., Wenny, D.G., Marquis, R.J., Ecosystem services provided by birds (2008) Ann. N. Y. Acad. Sci., 1134, pp. 25-60;<br/>Wood, C., Qiao, Y., Li, P., Ding, P., Lu, B., Xi, Y., Implications of rice agriculture for wild birds in China (2010) Waterbirds, 33, pp. 30-43;<br/>Wymenga, E., Zwarts, L., Use of rice fields by birds in West Africa (2010) Waterbirds, 33, pp. 97-104;<br/>Yusa, Y., Sugiura, N., Wada, T., Predatory potential of freshwater animals on an invasive agricultural pest, the apple snail Pomacea canaliculata (Gastropoda: Ampullariidae), in southern Japan (2006) Biol. Invasions, 8, pp. 137-147;<br/>Zhang, J.-E., Ouyang, Y., Huang, Z.-X., Characterization of nitrous oxide emission from a rice-duck farming system in south China (2008) Arch. Environ. Contam. Toxicol., 54, pp. 167-172</p>
[truncated: 2,513,928 more chars]
